# Supplementary material for: Global Proteomic Changes Induced by the Epstein-Barr Virus Oncoproteins Latent Membrane Protein 1 and 2A
Source: PubMed Central journal article supplement (PMC6016245; doi:10.1128/mbio.00959-18), 2018-06-19
Supplement: mbo003183928st2.pdf [file mbo003183928st2.pdf]

## Supplemental Table-2

### LMP1-no Inhibitors: Autophagy (P = 1)

| Symbol | Entrez Gene Name | LMP1 no Inhs |             | LMP2 no Inhs |             | LMP1 with Inhs |             | LMP2 with Inhs |             |
|--------|------------------|--------------|-------------|--------------|-------------|----------------|-------------|----------------|-------------|
|        |                  | p-value      | Fold Change | p-value      | Fold Change | p-value        | Fold Change | p-value        | Fold Change |
| None   |                  |              |             |              |             |                |             |                |             |

### LMP2-no Inhibitors: Autophagy (P = 1)

| Symbol | Entrez Gene Name                  | LMP1 no Inhs |             | LMP2 no Inhs |             | LMP1 with Inhs |             | LMP2 with Inhs |             |
|--------|-----------------------------------|--------------|-------------|--------------|-------------|----------------|-------------|----------------|-------------|
|        |                                   | p-value      | Fold Change | p-value      | Fold Change | p-value        | Fold Change | p-value        | Fold Change |
| RAB7A  | RAB7A, member RAS oncogene family | 8.84E-02     | -1.314      | 4.01E-02     | -1.687      | 4.68E-02       | -1.305      | 3.69E-02       | -1.902      |

### LMP1-with Inhibitors: Autophagy (P = 0.00219)

| Symbol   | Entrez Gene Name                                                            | LMP1 no Inhs |             | LMP2 no Inhs |             | LMP1 with Inhs |             | LMP2 with Inhs |             |
|----------|-----------------------------------------------------------------------------|--------------|-------------|--------------|-------------|----------------|-------------|----------------|-------------|
|          |                                                                             | p-value      | Fold Change | p-value      | Fold Change | p-value        | Fold Change | p-value        | Fold Change |
| ARSA     | arylsulfatase A                                                             | 1.00E+00     | 0           | 1.00E+00     | 0           | 5.36E-03       | -1.419      | 7.43E-01       | 1.121       |
| ATG2A    | autophagy related 2A                                                        | 1.00E+00     | 0           | 1.00E+00     | 0           | 9.39E-03       | -3.435      | 2.44E-02       | -1.216      |
| BAG3     | BCL2-associated athanogene 3                                                | 3.91E-01     | 1.292       | 1.46E-01     | 1.807       | 1.74E-03       | 1.712       | 2.66E-01       | -1.176      |
| CASP1    | caspase 1, apoptosis-related cysteine peptidase                             | 1.00E+00     | 1.079       | 1.57E-01     | -1.776      | 3.91E-02       | 1.376       | 4.70E-01       | -1.299      |
| CAST     | calpastatin                                                                 | 5.69E-01     | 1.357       | 1.59E-01     | 2.535       | 6.79E-03       | 1.556       | 2.02E-01       | 1.279       |
| EIF2S1   | eukaryotic translation initiation factor 2, subunit 1 alpha, 35kDa          | 1.87E-01     | 1.365       | 7.04E-01     | 1.067       | 2.93E-03       | -1.354      | 7.24E-01       | -1.028      |
| HDAC2    | histone deacetylase 2                                                       | 1.00E+00     | -3.841      | 1.00E+00     | -1.241      | 4.63E-02       | -1.22       | 4.45E-01       | -1.123      |
| IKBKG    | inhibitor of kappa light polypeptide gene enhancer in B-cells, kinase gamma | 1.00E+00     | 1.673       | 1.00E+00     | 1.769       | 5.03E-03       | 1.742       | 2.19E-01       | 1.327       |
| MAP1LC3B | microtubule-associated protein 1 light chain 3 beta                         |              |             |              |             | 2.18E-02       | 4.19        | 1.00E+00       |             |
| MAP2K2   | mitogen-activated protein kinase kinase 2                                   | 1.00E+00     | -1.03       | 1.00E+00     | 1.079       | 2.57E-02       | -1.397      | 2.02E-02       | -1.306      |
| MTMR3    | myotubularin related protein 3                                              |              |             |              |             | 1.29E-02       | 6.957       | 1.00E+00       | -11.459     |
| PLA2G4A  | phospholipase A2, group IVA (cytosolic, calcium-dependent)                  | 1.00E+00     | 0           | 1.00E+00     | 0           | 4.44E-02       | -1.379      | 3.22E-01       | 1.211       |
| RAB7A    | RAB7A, member RAS oncogene family                                           | 8.84E-02     | -1.314      | 4.01E-02     | -1.687      | 4.68E-02       | -1.305      | 3.69E-02       | -1.902      |
| RB1CC1   | RB1-inducible coiled-coil 1                                                 | 1.00E+00     | 0           | 1.00E+00     | 0           | 3.58E-02       | 1.808       | 5.38E-02       | 1.256       |
| SMYD3    | SET and MYND domain containing 3                                            | 1.00E+00     | 0           | 1.00E+00     | 0           | 1.27E-02       | -1.56       | 4.29E-01       | 1.101       |
| SOD1     | superoxide dismutase 1, soluble                                             | 4.63E-01     | 2.67        | 7.65E-01     | 1.356       | 1.68E-02       | 2.011       | 6.23E-01       | -1.434      |
| TBC1D4   | TBC1 domain family, member 4                                                | 5.93E-01     | -1.311      | 3.31E-01     | 1.669       | 3.87E-02       | -1.69       | 7.34E-01       | -1.071      |
| TBK1     | TANK-binding kinase 1                                                       | 1.00E+00     | 1.058       | 1.00E+00     | 0           | 4.25E-02       | -1.305      | 3.19E-01       | -1.093      |
| TLR3     | toll-like receptor 3                                                        |              |             |              |             | 4.57E-02       | -1.3        | 4.35E-02       | -2.468      |
| TOP1MT   | topoisomerase (DNA) I, mitochondrial                                        |              |             |              |             | 3.86E-02       | 1.338       | 7.10E-02       | 2.347       |
| ULK3     | unc-51 like kinase 3                                                        |              |             |              |             | 4.74E-02       | 2.199       | 3.33E-01       | 1.17        |

### LMP2-with Inhs Autophagy (P = 1)

| Symbol | Entrez Gene Name                          | LMP1 no Inhs |             | LMP2 no Inhs |             | LMP1 with Inhs |             | LMP2 with Inhs |             |
|--------|-------------------------------------------|--------------|-------------|--------------|-------------|----------------|-------------|----------------|-------------|
|        |                                           | p-value      | Fold Change | p-value      | Fold Change | p-value        | Fold Change | p-value        | Fold Change |
| ATG2A  | autophagy related 2A                      | 1.00E+00     | 0           | 1.00E+00     | 0           | 9.39E-03       | -3.435      | 2.44E-02       | -1.216      |
| MAP2K2 | mitogen-activated protein kinase kinase 2 | 1.00E+00     | -1.03       | 1.00E+00     | 1.079       | 2.57E-02       | -1.397      | 2.02E-02       | -1.306      |
| RAB7A  | RAB7A, member RAS oncogene family         | 8.84E-02     | -1.314      | 4.01E-02     | -1.687      | 4.68E-02       | -1.305      | 3.69E-02       | -1.902      |
| TLR3   | toll-like receptor 3                      |              |             |              |             | 4.57E-02       | -1.3        | 4.35E-02       | -2.468      |

**LMP1 - no inhibitors: Autophagy (manually curated)**

| <b>Symbol</b>            | <b>Entrez Gene Name</b>                   | <b>p-value</b> | <b>Fold Change</b> |
|--------------------------|-------------------------------------------|----------------|--------------------|
| VBP1                     | von Hippel-Lindau binding protein 1       | 1.50E-02       | -4.055781694       |
| CLIC4                    | chloride intracellular channel 4          | 4.78E-02       | 1.729643845        |
| UBE2V1;TMEM189 (UBE2V1B) | ubiquitin-conjugating enzyme E2 variant 1 | 1.10E-03       | 1.739125446        |
| NDRG1                    | N-myc downstream regulated 1              | 1.89E-04       | 2.06599963         |

**LMP2 - no inhibitors: Autophagy (manually curated)**

| <b>Symbol</b> | <b>Entrez Gene Name</b>      | <b>p-value</b> | <b>Fold Change</b> |
|---------------|------------------------------|----------------|--------------------|
| NDRG1         | N-myc downstream regulated 1 | 3.24E-02       | 2.278556272        |

**LMP1 - with inhibitors: Autophagy (manually curated)**

| <b>Symbol</b> | <b>Entrez Gene Name</b>                    | <b>p-value</b> | <b>Fold Change</b> |
|---------------|--------------------------------------------|----------------|--------------------|
| ELMO2         | Engulfment and cell motility protein 2     | 3.89E-02       | 1.267055971        |
| RAB8A         | Ras-related protein Rab-8A                 | 2.23E-02       | 1.300652663        |
| RAB8B         | Ras-related protein Rab-8B                 | 3.45E-02       | 1.900816849        |
| RAC2          | Ras-related C3 botulinum toxin substrate 2 | 1.04E-03       | 1.398859457        |
| TMEM59        | Transmembrane protein 59                   | 3.67E-02       | 1.527766906        |
| WDR6          | WD repeat-containing protein 6             | 2.82E-02       | -1.777276375       |

**LMP2 - with inhibitors: Autophagy (manually curated)**

| <b>Symbol</b> | <b>Entrez Gene Name</b>           | <b>p-value</b> | <b>Fold Change</b> |
|---------------|-----------------------------------|----------------|--------------------|
| LAMTOR4       | Ragulator complex protein LAMTOR4 | 6.46E-03       | -1.623568981       |
| RAB1B         | Ras-related protein Rab-1B        | 3.47E-02       | -1.29326287        |
| RAB38         | Ras-related protein Rab-38        | 8.78E-03       | 1.575185125        |





**LMP1 - no inhibitors: Fusion of Autophagosomes (P = 1)**

Symbol Entrez Gene Name  
None

| LMP1 no Inhs |             | LMP2 no Inhs |             | LMP1 with Inhs |             | LMP2 with Inhs |             |
|--------------|-------------|--------------|-------------|----------------|-------------|----------------|-------------|
| p-value      | Fold Change | p-value      | Fold Change | p-value        | Fold Change | p-value        | Fold Change |

**LMP2 - no inhibitors: Fusion of Autophagosomes (P = 0.0154)**

Symbol Entrez Gene Name  
RAB7A RAB7A, member RAS oncogene family

| LMP1 no Inhs |             | LMP2 no Inhs |             | LMP1 with Inhs |             | LMP2 with Inhs |             |
|--------------|-------------|--------------|-------------|----------------|-------------|----------------|-------------|
| p-value      | Fold Change | p-value      | Fold Change | p-value        | Fold Change | p-value        | Fold Change |
| 8.84E-02     | -1.314      | 4.01E-02     | -1.687      | 4.68E-02       | -1.305      | 3.69E-02       | -1.902      |

**LMP1 - with inhibitors: Fusion of Autophagosomes (P = 1)**

Symbol Entrez Gene Name  
RAB7A RAB7A, member RAS oncogene family

| LMP1 no Inhs |             | LMP2 no Inhs |             | LMP1 with Inhs |             | LMP2 with Inhs |             |
|--------------|-------------|--------------|-------------|----------------|-------------|----------------|-------------|
| p-value      | Fold Change | p-value      | Fold Change | p-value        | Fold Change | p-value        | Fold Change |
| 8.84E-02     | -1.314      | 4.01E-02     | -1.687      | 4.68E-02       | -1.305      | 3.69E-02       | -1.902      |

**LMP2 - with inhibitors: Fusion of Autophagosomes (P = 1)**

Symbol Entrez Gene Name  
RAB7A RAB7A, member RAS oncogene family

| LMP1 no Inhs |             | LMP2 no Inhs |             | LMP1 with Inhs |             | LMP2 with Inhs |             |
|--------------|-------------|--------------|-------------|----------------|-------------|----------------|-------------|
| p-value      | Fold Change | p-value      | Fold Change | p-value        | Fold Change | p-value        | Fold Change |
| 8.84E-02     | -1.314      | 4.01E-02     | -1.687      | 4.68E-02       | -1.305      | 3.69E-02       | -1.902      |

**LMP1-no Inhibitors: Endocytosis (P = 1)**

| Symbol | Entrez Gene Name | LMP1 no Inhs |             | LMP2 no Inhs |             | LMP1 with Inhs |             | LMP2 with Inhs |             |
|--------|------------------|--------------|-------------|--------------|-------------|----------------|-------------|----------------|-------------|
|        |                  | p-value      | Fold Change | p-value      | Fold Change | p-value        | Fold Change | p-value        | Fold Change |
| None   |                  |              |             |              |             |                |             |                |             |

**LMP2-no Inhibitors: Endocytosis (P = 1)**

| Symbol | Entrez Gene Name | LMP1 no Inhs |             | LMP2 no Inhs |             | LMP1 with Inhs |             | LMP2 with Inhs |             |
|--------|------------------|--------------|-------------|--------------|-------------|----------------|-------------|----------------|-------------|
|        |                  | p-value      | Fold Change | p-value      | Fold Change | p-value        | Fold Change | p-value        | Fold Change |
| None   |                  |              |             |              |             |                |             |                |             |

**LMP1-with Inhibitors: Endocytosis (P = 0.000229)**

| Symbol   | Entrez Gene Name                                                                        | LMP1 no Inhs |             | LMP2 no Inhs |             | LMP1 with Inhs |             | LMP2 with Inhs |             |
|----------|-----------------------------------------------------------------------------------------|--------------|-------------|--------------|-------------|----------------|-------------|----------------|-------------|
|          |                                                                                         | p-value      | Fold Change | p-value      | Fold Change | p-value        | Fold Change | p-value        | Fold Change |
| ACTN4    | actinin, alpha 4                                                                        | 3.46E-01     | 1.264       | 9.40E-01     | 1.023       | 3.67E-04       | 2.025       | 5.14E-01       | 1.040       |
| AP1S1    | adaptor-related protein complex 1, sigma 1 subunit                                      | 1.00E00      | -1.237      | 1.00E00      | 1.223       | 5.48E-03       | -1.441      | 5.03E-02       | -1.487      |
| ATG2A    | autophagy related 2A                                                                    | 1.00E00      | 0.000       | 1.00E00      | 0.000       | 9.39E-03       | -3.435      | 2.44E-02       | -1.216      |
| ATP6V0D1 | ATPase, H+ transporting, lysosomal 38kDa, V0 subunit d1                                 | 1.00E00      | 0.000       | 1.00E00      | 0.000       | 3.25E-02       | 1.934       | 4.54E-02       | 1.720       |
| CAP1     | CAP, adenylate cyclase-associated protein 1 (yeast)                                     | 1.00E00      | 3.389       | 1.00E00      | -4.715      | 4.49E-02       | 3.202       | 8.22E-01       | -1.155      |
| CCNT1    | cyclin T1                                                                               | 1.00E00      | 0.000       | 1.00E00      | 0.000       | 3.29E-02       | -2.021      | 2.75E-01       | -1.373      |
| CD44     | CD44 molecule (Indian blood group)                                                      | 4.40E-01     | -2.277      | 1.34E-01     | -3.127      | 5.16E-03       | -1.316      | 4.93E-01       | -1.089      |
| CDK5     | cyclin-dependent kinase 5                                                               | 1.00E00      | 0.000       | 1.00E00      | 0.000       | 1.64E-02       | -1.426      | 2.70E-01       | 1.029       |
| CLIC3    | chloride intracellular channel 3                                                        |              |             |              |             | 1.54E-03       | 5.988       | 2.17E-02       | -8.334      |
| CYTH2    | cytohesin 2                                                                             | 1.00E00      | 1.312       | 1.00E00      | 0.000       | 3.25E-02       | 2.162       | 6.74E-01       | -1.104      |
| EPB41L2  | erythrocyte membrane protein band 4.1-like 2                                            | 1.00E00      | 0.000       | 1.00E00      | 0.000       | 5.58E-03       | -1.850      | 1.00E00        | 1.520       |
| EZR      | ezrin                                                                                   | 4.70E-01     | 1.533       | 6.72E-01     | 1.354       | 3.55E-02       | 2.326       | 9.76E-01       | -1.012      |
| HP       | haptoglobin                                                                             |              |             |              |             | 2.21E-02       | 1.965       | 6.28E-01       | -1.086      |
| HSPA8    | heat shock 70kDa protein 8                                                              | 7.91E-01     | 1.055       | 3.99E-01     | 1.176       | 4.62E-02       | -2.934      | 5.98E-01       | 2.678       |
| ICAM1    | intercellular adhesion molecule 1                                                       | 1.00E00      | 1.102       | 1.00E00      | 0.000       | 1.20E-02       | 4.093       | 4.97E-01       | -1.175      |
| LGALS3   | lectin, galactoside-binding, soluble, 3                                                 | 2.19E-01     | 1.602       | 5.08E-01     | -1.695      | 1.83E-02       | 2.188       | 6.11E-01       | 1.139       |
| MYO6     | myosin VI                                                                               | 7.07E-01     | 1.104       | 2.96E-01     | -1.384      | 2.53E-02       | 1.468       | 7.71E-02       | -1.689      |
| PAK1     | p21 protein (Cdc42/Rac)-activated kinase 1                                              |              |             |              |             | 3.34E-02       | -1.594      | 1.00E00        |             |
| PLA2G4A  | phospholipase A2, group IVA (cytosolic, calcium-dependent)                              | 1.00E00      | 0.000       | 1.00E00      | 0.000       | 4.44E-02       | -1.379      | 3.22E-01       | 1.211       |
| RAB7A    | RAB7A, member RAS oncogene family                                                       | 8.84E-02     | -1.314      | 4.01E-02     | -1.687      | 4.68E-02       | -1.305      | 3.69E-02       | -1.902      |
| RAC2     | ras-related C3 botulinum toxin substrate 2 (rho family, small GTP binding protein Rac2) | 1.00E00      | 0.000       | 1.00E00      | 0.000       | 1.04E-03       | 1.399       | 7.67E-02       | -1.210      |
| RUFY1    | RUN and FYVE domain containing 1                                                        | 7.78E-01     | -1.071      | 5.71E-01     | -1.496      | 1.42E-03       | -1.445      | 6.14E-01       | 1.079       |
| SNX3     | sorting nexin 3                                                                         | 5.64E-01     | -1.325      | 9.25E-01     | 1.030       | 1.45E-02       | -1.306      | 4.88E-02       | -1.335      |
| TLR3     | toll-like receptor 3                                                                    |              |             |              |             | 4.57E-02       | -1.300      | 4.35E-02       | -2.468      |

**LMP2-with Inhibitors: Endocytosis (P = 0.000263)**

| Symbol   | Entrez Gene Name                                                          | LMP1 no Inhs |             | LMP2 no Inhs |             | LMP1 with Inhs |             | LMP2 with Inhs |             |
|----------|---------------------------------------------------------------------------|--------------|-------------|--------------|-------------|----------------|-------------|----------------|-------------|
|          |                                                                           | p-value      | Fold Change | p-value      | Fold Change | p-value        | Fold Change | p-value        | Fold Change |
| ANXA6    | annexin A6                                                                | 1.00E00      | 0.000       | 1.00E00      | 0.000       | 9.17E-01       | 1.062       | 3.45E-02       | -1.977      |
| ATG2A    | autophagy related 2A                                                      | 1.00E00      | 0.000       | 1.00E00      | 0.000       | 9.39E-03       | -3.435      | 2.44E-02       | -1.216      |
| ATP5B    | ATP synthase, H+ transporting, mitochondrial F1 complex, beta polypeptide | 3.44E-01     | -1.221      | 8.35E-01     | 1.103       | 1.00E00        | -1.570      | 1.52E-02       | -2.313      |
| ATP6V0D1 | ATPase, H+ transporting, lysosomal 38kDa, V0 subunit d1                   | 1.00E00      | 0.000       | 1.00E00      | 0.000       | 3.25E-02       | 1.934       | 4.54E-02       | 1.720       |
| ATP6V1F  | ATPase, H+ transporting, lysosomal 14kDa, V1 subunit F                    | 1.00E00      | 0.000       | 1.00E00      | 0.000       | 6.61E-01       | 1.174       | 2.08E-02       | -1.398      |
| ATP6V1H  | ATPase, H+ transporting, lysosomal 50/57kDa, V1 subunit H                 | 2.75E-01     | -2.373      | 1.00E00      | -1.701      | 4.91E-01       | 1.126       | 1.63E-02       | -1.311      |
| CD2AP    | CD2-associated protein                                                    | 6.28E-01     | 1.300       | 1.59E-01     | 2.012       | 8.76E-01       | 1.007       | 1.93E-02       | -1.208      |
| CLIC3    | chloride intracellular channel 3                                          |              |             |              |             | 1.54E-03       | 5.988       | 2.17E-02       | -8.334      |

|        |                                                                   |          |        |          |        |          |        |          |        |
|--------|-------------------------------------------------------------------|----------|--------|----------|--------|----------|--------|----------|--------|
| DYRK1A | dual-specificity tyrosine-(Y)-phosphorylation regulated kinase 1A |          |        |          |        | 7.80E-02 | -1.271 | 3.54E-02 | -1.395 |
| FMR1   | fragile X mental retardation 1                                    | 7.18E-02 | -2.219 | 3.05E-01 | -1.654 | 3.63E-01 | -1.454 | 3.98E-02 | -1.650 |
| NKAP   | NFKB activating protein                                           | 1.00E00  | 0.000  | 1.00E00  | 0.000  | 5.51E-01 | 1.185  | 3.79E-02 | 1.518  |
| PDLIM7 | PDZ and LIM domain 7 (enigma)                                     | 2.42E-01 | 1.589  | 4.20E-01 | -1.346 | 7.52E-01 | -1.132 | 5.62E-03 | -1.875 |
| RAB7A  | RAB7A, member RAS oncogene family                                 | 8.84E-02 | -1.314 | 4.01E-02 | -1.687 | 4.68E-02 | -1.305 | 3.69E-02 | -1.902 |
| SCAMP2 | secretory carrier membrane protein 2                              | 1.00E00  | -1.884 | 1.00E00  | 0.000  | 7.57E-01 | -1.075 | 8.07E-03 | -2.146 |
| SCARB2 | scavenger receptor class B, member 2                              | 1.00E00  | 0.000  | 1.00E00  | 0.000  | 5.73E-02 | 2.970  | 4.44E-02 | 2.514  |
| SNX3   | sorting nexin 3                                                   | 5.64E-01 | -1.325 | 9.25E-01 | 1.030  | 1.45E-02 | -1.306 | 4.88E-02 | -1.335 |
| STIM1  | stromal interaction molecule 1                                    | 1.00E00  | 0.000  | 1.00E00  | 0.000  | 4.59E-01 | 1.167  | 3.48E-02 | -1.984 |
| TLN1   | talin 1                                                           | 6.90E-01 | 1.081  | 1.64E-01 | -1.316 | 7.06E-02 | 1.063  | 2.74E-02 | -1.154 |
| TLR3   | toll-like receptor 3                                              |          |        |          |        | 4.57E-02 | -1.300 | 4.35E-02 | -2.468 |

**LMP1 - no inhibitors: Endocytosis (manually curated)**

| Symbol         | Entrez Gene Name                                        | p-value  | Fold Change  |
|----------------|---------------------------------------------------------|----------|--------------|
| CENPF          | centromere protein F, 350/400kDa                        | 3.29E-02 | -2.717499934 |
| ATP6V1C1       | ATPase, H+ transporting, lysosomal 42kDa, V1 subunit C1 | 4.86E-02 | -1.907228897 |
| SEC23B         | Sec23 homolog B (S. cerevisiae)                         | 1.06E-02 | -1.810327859 |
| EHD4           | EH-domain containing 4                                  | 3.96E-02 | -1.275960793 |
| ESYT2 (E-Syt2) | extended synaptotagmin-like protein 2                   | 4.36E-03 | -1.209342592 |
| MAP4           | microtubule-associated protein 4                        | 3.74E-02 | 1.492165958  |
| RAB1B;RAB1C    | RAB1B, member RAS oncogene family                       | 2.65E-02 | 1.584738721  |
| UBE2V1;TMEM189 | ubiquitin-conjugating enzyme E2 variant 1               | 1.10E-03 | 1.739125446  |
| HSPB1          | heat shock 27kDa protein 1                              | 1.20E-02 | 3.426533995  |

**LMP2 - no inhibitors: Endocytosis (manually curated)**

| Symbol          | Entrez Gene Name                        | p-value     | Fold Change  |
|-----------------|-----------------------------------------|-------------|--------------|
| MYOF            | myoferlin                               | 0.018898616 | -2.037951898 |
| EHD4            | EH-domain containing 4                  | 0.022249487 | -1.300305845 |
| SNX5            | sorting nexin 5                         | 0.039402157 | 1.383029568  |
| SPG20 (Spartin) | spastic paraplegia 20 (Troyer syndrome) | 0.001199997 | 2.185767576  |
| RIN1            | Ras and Rab interactor 1                | 0.011817075 | 2.719666969  |

**LMP1 - with inhibitors: Endocytosis (manually curated)**

| Symbol         | Entrez Gene Name                             | p-value  | Fold Change  |
|----------------|----------------------------------------------|----------|--------------|
| ACTR1A         | Alpha-centractin                             | 1.81E-02 | -2.395098694 |
| ATP6V1B1       | V-type proton ATPase subunit B               | 2.21E-02 | 3.881224741  |
| CCT8           | T-complex protein 1 subunit theta            | 9.35E-03 | -1.291184584 |
| COPS6          | COP9 signalosome complex subunit 6           | 5.68E-03 | -1.935473811 |
| CPNE2          | Copine-2                                     | 1.96E-02 | 1.790844494  |
| DCTN2          | Dynactin subunit 2                           | 7.02E-07 | 1.41671649   |
| CAST           | Isoform 5 of Calpastatin                     | 6.79E-03 | 1.555674618  |
| DPYSL2 (CRMP2) | Dihydropyrimidinase-related protein 2        | 2.49E-03 | 1.350911587  |
| HSP90AA1       | Heat shock protein HSP 90-alpha              | 3.43E-02 | -1.334943391 |
| NISCH          | Nischarin                                    | 4.48E-02 | -1.51707755  |
| RAB11FIP1      | Rab11 family-interacting protein 1           | 2.21E-02 | 2.94610588   |
| RAB8A          | Ras-related protein Rab-8A                   | 2.23E-02 | 1.300652663  |
| RAB8B          | Ras-related protein Rab-8B                   | 3.45E-02 | 1.900816849  |
| RABEP2         | Rab GTPase-binding effector protein 2        | 3.52E-03 | 1.433408397  |
| SEC61B         | Protein transport protein Sec61 subunit beta | 1.98E-02 | -1.829414207 |
| SNX24          | Isoform 2 of Sorting nexin-24                | 7.27E-03 | 1.582019087  |
| SYNGR2         | Synaptogyrin-2                               | 2.59E-03 | 1.884764     |
| TBC1D13        | Isoform 2 of TBC1 domain family member 13    | 2.44E-02 | 3.209758156  |
| TBC1D4         | Isoform 2 of TBC1 domain family member 4     | 3.87E-02 | -1.690175505 |
| TBC1D8         | TBC1 domain family member 8                  | 4.02E-02 | 7.102937893  |
| TBK1           | Serine/threonine-protein kinase TBK1         | 4.25E-02 | -1.305041485 |
| TM9SF2         | Transmembrane 9 superfamily member 2         | 8.18E-03 | 1.671112068  |
| TMEM59         | Transmembrane protein 59                     | 3.67E-02 | 1.527766906  |
| VAMP5          | Vesicle-associated membrane protein 5        | 4.68E-02 | -1.960523711 |

**LMP2 - with inhibitors: Endocytosis (manually curated)**

| Symbol | Entrez Gene Name | p-value | Fold Change |
|--------|------------------|---------|-------------|
|--------|------------------|---------|-------------|



|                        |                                                 |          |              |
|------------------------|-------------------------------------------------|----------|--------------|
| AP4S1                  | AP-4 complex subunit sigma-1                    | 3.58E-02 | 1.652048133  |
| CTSA                   | cathepsin A (Lysosomal protective protein)      | 5.14E-03 | -3.701413478 |
| CTSH                   | Pro-cathepsin H                                 | 5.12E-04 | -2.389562152 |
| EXOC3                  | Exocyst complex component 3                     | 3.09E-02 | -1.456172244 |
| EXOC5                  | Exocyst complex component 5                     | 1.07E-02 | -2.130538312 |
| EXOC6B                 | Exocyst complex component 6B                    | 4.85E-02 | -1.809070274 |
| LAMTOR4                | Ragulator complex protein LAMTOR4               | 6.46E-03 | -1.623568981 |
| RAB1B                  | Ras-related protein Rab-1B                      | 3.47E-02 | -1.29326287  |
| RAB38                  | Ras-related protein Rab-38                      | 8.78E-03 | 1.575185125  |
| SCRN1                  | Secernin-1                                      | 6.02E-05 | -2.200461935 |
| SDCBP (MDA-9/Syntenin) | Syntenin-1                                      | 2.26E-03 | -1.419647959 |
| SNX24                  | Sorting nexin-24                                | 4.15E-02 | -1.626506406 |
| SYNJ2                  | Synaptojanin-2                                  | 4.39E-02 | 1.937258143  |
| TMED4                  | Transmembrane emp24 domain-containing protein 4 | 3.37E-03 | -1.475541002 |
| TMEM192                | Transmembrane protein 192                       | 3.72E-02 | 1.936598107  |
| TMEM63B                | Transmembrane protein 63B                       | 2.85E-03 | 5.755350433  |
| TRAPPC1                | Trafficking protein particle complex subunit 1  | 2.03E-02 | -1.473162003 |
| VPS37B                 | Vacuolar protein sorting-associated protein 37B | 1.85E-02 | -1.485121003 |

**LMP1-no Inhibitors: Fusion of Late Endosomes (P = 1)**

**Symbol** **Entrez Gene Name**  
None

| LMP1 no Inhs |             | LMP2 no Inhs |             | LMP1 with Inhs |             | LMP2 with Inhs |             |
|--------------|-------------|--------------|-------------|----------------|-------------|----------------|-------------|
| p-value      | Fold Change | p-value      | Fold Change | p-value        | Fold Change | p-value        | Fold Change |

**LMP2-no Inhibitors: Fusion of Late Endosomes (P = 0.0176)**

**Symbol** **Entrez Gene Name**  
RAB7A RAB7A, member RAS oncogene family

| LMP1 no Inhs |             | LMP2 no Inhs |             | LMP1 with Inhs |             | LMP2 with Inhs |             |
|--------------|-------------|--------------|-------------|----------------|-------------|----------------|-------------|
| p-value      | Fold Change | p-value      | Fold Change | p-value        | Fold Change | p-value        | Fold Change |
| 8.84E-02     | -1.314      | 4.01E-02     | -1.687      | 4.68E-02       | -1.305      | 3.69E-02       | -1.902      |

**LMP1-with Inhibitors: Fusion of Late Endosomes (P = 1)**

**Symbol** **Entrez Gene Name**  
RAB7A RAB7A, member RAS oncogene family

| p-value  | Fold Change | p-value  | Fold Change | p-value  | Fold Change | p-value  | Fold Change |
|----------|-------------|----------|-------------|----------|-------------|----------|-------------|
| 8.84E-02 | -1.314      | 4.01E-02 | -1.687      | 4.68E-02 | -1.305      | 3.69E-02 | -1.902      |

**LMP2-with Inhibitors: Fusion of Late Endosomes (P = 0.0095)**

**Symbol** **Entrez Gene Name**  
C20orf24 chromosome 20 open reading frame 24  
RAB7A RAB7A, member RAS oncogene family  
STX8 syntaxin 8

| LMP1 no Inhs |             | LMP2 no Inhs |             | LMP1 with Inhs |             | LMP2 with Inhs |             |
|--------------|-------------|--------------|-------------|----------------|-------------|----------------|-------------|
| p-value      | Fold Change | p-value      | Fold Change | p-value        | Fold Change | p-value        | Fold Change |
|              |             |              |             | 2.01E-01       | -1.450      | 4.27E-02       | -1.390      |
| 8.84E-02     | -1.314      | 4.01E-02     | -1.687      | 4.68E-02       | -1.305      | 3.69E-02       | -1.902      |
| 1.00E00      | -3.941      | 1.00E00      | -1.525      | 7.26E-01       | -1.081      | 2.91E-02       | -1.653      |

**LMP1-no Inhibitors: Endocytosis by Tumor cell lines (P = 1)**

none

**LMP2-no Inhibitors: Endocytosis by Tumor cell lines (P = 1)**

none

**LMP1-with Inhibitors: Endocytosis by Tumor cell lines (P = 1)**

| Symbol   | Entrez Gene Name                                        |
|----------|---------------------------------------------------------|
| ATP6V0D1 | ATPase, H+ transporting, lysosomal 38kDa, V0 subunit d1 |
| CLIC3    | chloride intracellular channel 3                        |

| LMP1 no Inhs |             | LMP2 no Inhs |             | LMP1 with Inhs |             | LMP2 with Inhs |             |
|--------------|-------------|--------------|-------------|----------------|-------------|----------------|-------------|
| p-value      | Fold Change | p-value      | Fold Change | p-value        | Fold Change | p-value        | Fold Change |
| 1.00E+00     | 0           | 1.00E+00     | 0           | 3.25E-02       | 1.934       | 4.54E-02       | 1.72        |
|              |             |              |             | 1.54E-03       | 5.988       | 2.17E-02       | -8.334      |

**LMP2-with Inhibitors: Endocytosis by Tumor cell lines (P = 0.013)**

| Symbol   | Entrez Gene Name                                        |
|----------|---------------------------------------------------------|
| ATP6V0D1 | ATPase, H+ transporting, lysosomal 38kDa, V0 subunit d1 |
| ATP6V1F  | ATPase, H+ transporting, lysosomal 14kDa, V1 subunit F  |
| CLIC3    | chloride intracellular channel 3                        |
| NKAP     | NFKB activating protein                                 |
| SCARB2   | scavenger receptor class B, member 2                    |

| LMP1 no Inhs |             | LMP2 no Inhs |             | LMP1 with Inhs |             | LMP2 with Inhs |             |
|--------------|-------------|--------------|-------------|----------------|-------------|----------------|-------------|
| p-value      | Fold Change | p-value      | Fold Change | p-value        | Fold Change | p-value        | Fold Change |
| 1.00E+00     | 0           | 1.00E+00     | 0           | 3.25E-02       | 1.934       | 4.54E-02       | 1.72        |
|              |             |              |             | 6.61E-01       | 1.174       | 2.08E-02       | -1.398      |
|              |             |              |             | 1.54E-03       | 5.988       | 2.17E-02       | -8.334      |
|              |             |              |             | 5.51E-01       | 1.185       | 3.79E-02       | 1.518       |
|              |             |              |             | 5.73E-02       | 2.97        | 4.44E-02       | 2.514       |

**LMP1-no Inhibitors: Caveolar-Mediated Endocytosis (P = 0.3477)**

| Symbol | Entrez Gene Name |
|--------|------------------|
| FLOT2  | flotillin 2      |

**LMP2-no Inhibitors: Caveolar-Mediated Endocytosis (P = 1)**

None

**LMP1-with Inhibitors: Caveolar-Mediated Endocytosis (P = 0.0496)**

| Symbol | Entrez Gene Name                                            |
|--------|-------------------------------------------------------------|
| ACTG1  | actin, gamma 1                                              |
| FLNB   | filamin B, beta                                             |
| HLA-B  | major histocompatibility complex, class I, B                |
| ITGA5  | integrin, alpha 5 (fibronectin receptor, alpha polypeptide) |
| ITGB4  | integrin, beta 4                                            |

**LMP2-with Inhibitors: Caveolar-Mediated Endocytosis (P = 0.4151)**

| Symbol | Entrez Gene Name                                                                         |
|--------|------------------------------------------------------------------------------------------|
| ITGA5  | integrin, alpha 5 (fibronectin receptor, alpha polypeptide)                              |
| ITGAE  | integrin, alpha E (antigen CD103, human mucosal lymphocyte antigen 1; alpha polypeptide) |

| LMP1 no Inhs |             | LMP2 no Inhs |             | LMP1 with Inhs |             | LMP2 with Inhs |             |
|--------------|-------------|--------------|-------------|----------------|-------------|----------------|-------------|
| p-value      | Fold Change | p-value      | Fold Change | p-value        | Fold Change | p-value        | Fold Change |
| 3.55E-02     | -1.664      | 3.63E-01     | -2.093      | 6.31E-01       | 1.078       | 9.33E-01       | 1.015       |

| LMP1 no Inhs |             | LMP2 no Inhs |             | LMP1 with Inhs |             | LMP2 with Inhs |             |
|--------------|-------------|--------------|-------------|----------------|-------------|----------------|-------------|
| p-value      | Fold Change | p-value      | Fold Change | p-value        | Fold Change | p-value        | Fold Change |
| 4.38E-01     | 2.212       | 9.31E-01     | 1.090       | 6.29E-03       | 1.182       | 1.00E00        | -1.548      |
| 1.24E-01     | 1.607       | 6.49E-01     | 1.104       | 3.33E-02       | 1.281       | 1.84E-01       | -3.752      |
| 1.00E00      | -2.445      | 1.00E00      | -1.504      | 2.06E-02       | 4.993       | 1.00E00        | 1.329       |
| 3.64E-01     | -2.172      | 1.00E00      | -3.726      | 4.33E-02       | -2.098      | 2.27E-02       | -2.119      |
| 5.06E-01     | -1.180      | 7.55E-01     | -1.092      | 3.98E-02       | -1.164      | 1.00E00        | -1.292      |

| LMP1 no Inhs |             | LMP2 no Inhs |             | LMP1 with Inhs |             | LMP2 with Inhs |             |
|--------------|-------------|--------------|-------------|----------------|-------------|----------------|-------------|
| p-value      | Fold Change | p-value      | Fold Change | p-value        | Fold Change | p-value        | Fold Change |
| 3.64E-01     | -2.172      | 1.00E00      | -3.726      | 4.33E-02       | -2.098      | 2.27E-02       | -2.119      |
|              |             |              |             | 7.25E-01       | -1.098      | 4.70E-02       | -1.586      |

**LMP1-no Inhibitors: Viral Entry via Endocytic Pathway (P = 0.422)**

| Symbol | Entrez Gene Name        |
|--------|-------------------------|
| CLTA   | clathrin, light chain A |

| LMP1 no Inhs |             | LMP2 no Inhs |             | LMP1 with Inhs |             | LMP2 with Inhs |             |
|--------------|-------------|--------------|-------------|----------------|-------------|----------------|-------------|
| p-value      | Fold Change | p-value      | Fold Change | p-value        | Fold Change | p-value        | Fold Change |
| 4.43E-02     | -2.209      | 4.56E-01     | -1.644      | 9.74E-01       | -1.024      | 9.20E-01       | 1.084       |

**LMP2-no Inhibitors: Viral Entry via Endocytic Pathway (P = 1)**

None

**LMP1-with Inhibitors: Viral Entry via Endocytic Pathway (P = 0.043)**

| Symbol | Entrez Gene Name                                                                        |
|--------|-----------------------------------------------------------------------------------------|
| ACTG1  | actin, gamma 1                                                                          |
| FLNB   | filamin B, beta                                                                         |
| HLA-B  | major histocompatibility complex, class I, B                                            |
| ITGA5  | integrin, alpha 5 (fibronectin receptor, alpha polypeptide)                             |
| ITGB4  | integrin, beta 4                                                                        |
| RAC2   | ras-related C3 botulinum toxin substrate 2 (rho family, small GTP binding protein Rac2) |

| LMP1 no Inhs |             | LMP2 no Inhs |             | LMP1 with Inhs |             | LMP2 with Inhs |             |
|--------------|-------------|--------------|-------------|----------------|-------------|----------------|-------------|
| p-value      | Fold Change | p-value      | Fold Change | p-value        | Fold Change | p-value        | Fold Change |
| 4.38E-01     | 2.212       | 9.31E-01     | 1.090       | 6.29E-03       | 1.182       | 1.00E00        | -1.548      |
| 1.24E-01     | 1.607       | 6.49E-01     | 1.104       | 3.33E-02       | 1.281       | 1.84E-01       | -3.752      |
| 1.00E00      | -2.445      | 1.00E00      | -1.504      | 2.06E-02       | 4.993       | 1.00E00        | 1.329       |
| 3.64E-01     | -2.172      | 1.00E00      | -3.726      | 4.33E-02       | -2.098      | 2.27E-02       | -2.119      |
| 5.06E-01     | -1.180      | 7.55E-01     | -1.092      | 3.98E-02       | -1.164      | 1.00E00        | -1.292      |
| 1.00E00      | 0.000       | 1.00E00      | 0.000       | 1.04E-03       | 1.399       | 7.67E-02       | -1.210      |

**LMP2-with Inhibitors: Viral Entry via Endocytic Pathway (P = 1)**

| Symbol | Entrez Gene Name                                            |
|--------|-------------------------------------------------------------|
| ITGA5  | integrin, alpha 5 (fibronectin receptor, alpha polypeptide) |

| LMP1 no Inhs |             | LMP2 no Inhs |             | LMP1 with Inhs |             | LMP2 with Inhs |             |
|--------------|-------------|--------------|-------------|----------------|-------------|----------------|-------------|
| p-value      | Fold Change | p-value      | Fold Change | p-value        | Fold Change | p-value        | Fold Change |
| 3.64E-01     | -2.172      | 1.00E00      | -3.726      | 4.33E-02       | -2.098      | 2.27E-02       | -2.119      |

**LMP1-no Inhibitors: Clathrin-Mediated Endocytosis (P = 0.136)**

| Symbol | Entrez Gene Name                                    |
|--------|-----------------------------------------------------|
| ARPC4  | actin related protein 2/3 complex, subunit 4, 20kDa |
| CLTA   | clathrin, light chain A                             |
| MYO1E  | myosin IE                                           |

**LMP2-no Inhibitors: Clathrin-Mediated Endocytosis (P = 0.151)**

| Symbol | Entrez Gene Name                  |
|--------|-----------------------------------|
| RAB7A  | RAB7A, member RAS oncogene family |

**LMP1-with Inhibitors: Clathrin-Mediated Endocytosis (P = 0.04)**

| Symbol | Entrez Gene Name                                            |
|--------|-------------------------------------------------------------|
| ACTG1  | actin, gamma 1                                              |
| ARPC1A | actin related protein 2/3 complex, subunit 1A, 41kDa        |
| HSPA8  | heat shock 70kDa protein 8                                  |
| ITGA5  | integrin, alpha 5 (fibronectin receptor, alpha polypeptide) |
| ITGB4  | integrin, beta 4                                            |
| MET    | MET proto-oncogene, receptor tyrosine kinase                |
| MYO6   | myosin VI                                                   |
| RAB7A  | RAB7A, member RAS oncogene family                           |

**LMP2-with Inhibitors: Clathrin-Mediated Endocytosis (P = 0.0028)**

| Symbol | Entrez Gene Name                                            |
|--------|-------------------------------------------------------------|
| ACTR2  | ARP2 actin-related protein 2 homolog (yeast)                |
| CD2AP  | CD2-associated protein                                      |
| CHP1   | calcineurin-like EF-hand protein 1                          |
| ITGA5  | integrin, alpha 5 (fibronectin receptor, alpha polypeptide) |
| PPP3R1 | protein phosphatase 3, regulatory subunit B, alpha          |
| RAB7A  | RAB7A, member RAS oncogene family                           |

| LMP1 no Inhs |             | LMP2 no Inhs |             | LMP1 with Inhs |             | LMP2 with Inhs |             |
|--------------|-------------|--------------|-------------|----------------|-------------|----------------|-------------|
| p-value      | Fold Change | p-value      | Fold Change | p-value        | Fold Change | p-value        | Fold Change |
| 1.11E-02     | -1.511      | 9.32E-01     | -1.010      | 5.30E-01       | -1.042      | 2.83E-01       | 1.177       |
| 4.43E-02     | -2.209      | 4.56E-01     | -1.644      | 9.74E-01       | -1.024      | 9.20E-01       | 1.084       |
| 5.17E-04     | 2.221       | 1.00E00      | 2.228       | 5.39E-01       | 1.315       | 9.06E-01       | -1.033      |

| LMP1 no Inhs |             | LMP2 no Inhs |             | LMP1 with Inhs |             | LMP2 with Inhs |             |
|--------------|-------------|--------------|-------------|----------------|-------------|----------------|-------------|
| p-value      | Fold Change | p-value      | Fold Change | p-value        | Fold Change | p-value        | Fold Change |
| 8.84E-02     | -1.314      | 4.01E-02     | -1.687      | 4.68E-02       | -1.305      | 3.69E-02       | -1.902      |

| LMP1 no Inhs |             | LMP2 no Inhs |             | LMP1 with Inhs |             | LMP2 with Inhs |             |
|--------------|-------------|--------------|-------------|----------------|-------------|----------------|-------------|
| p-value      | Fold Change | p-value      | Fold Change | p-value        | Fold Change | p-value        | Fold Change |
| 4.38E-01     | 2.212       | 9.31E-01     | 1.090       | 6.29E-03       | 1.182       | 1.00E00        | -1.548      |
| 3.33E-01     | 1.922       | 7.89E-01     | 1.212       | 3.81E-02       | 1.382       | 2.37E-01       | -1.175      |
| 7.91E-01     | 1.055       | 3.99E-01     | 1.176       | 4.62E-02       | -2.934      | 5.98E-01       | 2.678       |
| 3.64E-01     | -2.172      | 1.00E00      | -3.726      | 4.33E-02       | -2.098      | 2.27E-02       | -2.119      |
| 5.06E-01     | -1.180      | 7.55E-01     | -1.092      | 3.98E-02       | -1.164      | 1.00E00        | -1.292      |
| 1.00E00      | 0.000       | 1.00E00      | 0.000       | 4.99E-02       | -1.277      | 6.91E-01       | 1.046       |
| 7.07E-01     | 1.104       | 2.96E-01     | -1.384      | 2.53E-02       | 1.468       | 7.71E-02       | -1.689      |
| 8.84E-02     | -1.314      | 4.01E-02     | -1.687      | 4.68E-02       | -1.305      | 3.69E-02       | -1.902      |

| LMP1 no Inhs |             | LMP2 no Inhs |             | LMP1 with Inhs |             | LMP2 with Inhs |             |
|--------------|-------------|--------------|-------------|----------------|-------------|----------------|-------------|
| p-value      | Fold Change | p-value      | Fold Change | p-value        | Fold Change | p-value        | Fold Change |
| 3.55E-01     | 1.594       | 9.05E-01     | -1.028      | 8.73E-01       | -1.010      | 4.13E-02       | -1.124      |
| 6.28E-01     | 1.300       | 1.59E-01     | 2.012       | 8.76E-01       | 1.007       | 1.93E-02       | -1.208      |
|              |             |              |             | 9.61E-01       | 1.008       | 5.71E-03       | -1.477      |
| 3.64E-01     | -2.172      | 1.00E00      | -3.726      | 4.33E-02       | -2.098      | 2.27E-02       | -2.119      |
| 1.00E00      | 0.000       | 1.00E00      | 0.000       | 1.33E-01       | -1.373      | 1.02E-02       | -1.585      |
| 8.84E-02     | -1.314      | 4.01E-02     | -1.687      | 4.68E-02       | -1.305      | 3.69E-02       | -1.902      |

**LMP1-no Inhibitors: Viral Exit from Cells (P = 1)**

None

**LMP2-no Inhibitors: Viral Exit from Cells (P = 0.0864)**

**Symbol** **Entrez Gene Name**  
 CHMP4B charged multivesicular body protein 4B

| LMP1 no Inhs |             | LMP2 no Inhs |             | LMP1 with Inhs |             | LMP2 with Inhs |             |
|--------------|-------------|--------------|-------------|----------------|-------------|----------------|-------------|
| p-value      | Fold Change | p-value      | Fold Change | p-value        | Fold Change | p-value        | Fold Change |
| 1.18E-01     | -2.014      | 1.76E-02     | -1.900      | 2.24E-01       | 1.859       | 6.93E-01       | 1.222       |

**LMP1-with Inhibitors: Viral Exit from Cells (P = 1)**

**Symbol** **Entrez Gene Name**  
 ACTG1 actin, gamma 1

| LMP1 no Inhs |             | LMP2 no Inhs |             | LMP1 with Inhs |             | LMP2 with Inhs |             |
|--------------|-------------|--------------|-------------|----------------|-------------|----------------|-------------|
| p-value      | Fold Change | p-value      | Fold Change | p-value        | Fold Change | p-value        | Fold Change |
| 4.38E-01     | 2.212       | 9.31E-01     | 1.090       | 6.29E-03       | 1.182       | 1.00E00        | -1.548      |

**LMP2-with Inhibitors: Viral Exit from Cells (P = 0.0431)**

**Symbol** **Entrez Gene Name**  
 CHMP3 charged multivesicular body protein 3  
 PDCD6IP programmed cell death 6 interacting protein  
 VPS4A vacuolar protein sorting 4 homolog A (S. cerevisiae)

| LMP1 no Inhs |             | LMP2 no Inhs |             | LMP1 with Inhs |             | LMP2 with Inhs |             |
|--------------|-------------|--------------|-------------|----------------|-------------|----------------|-------------|
| p-value      | Fold Change | p-value      | Fold Change | p-value        | Fold Change | p-value        | Fold Change |
| 1.00E00      | -1.412      | 1.00E00      | 1.152       | 2.51E-01       | -1.233      | 3.16E-03       | -1.427      |
| 1.16E-01     | 1.678       | 5.08E-01     | 1.196       | 1.39E-01       | -1.067      | 2.27E-02       | -1.149      |
| 9.14E-01     | 1.023       | 8.11E-01     | -1.087      | 1.52E-01       | -1.253      | 4.18E-02       | -1.437      |

**LMP1-no Inhibitors: Macropinocytosis (P = 1)**

None

**LMP2-no Inhibitors: Macropinocytosis (P = 0.033)**

**Symbol Entrez Gene Name**

SNX5 sorting nexin 5

| LMP1 no Inhs |             | LMP2 no Inhs |             | LMP1 with Inhs |             | LMP2 with Inhs |             |
|--------------|-------------|--------------|-------------|----------------|-------------|----------------|-------------|
| p-value      | Fold Change | p-value      | Fold Change | p-value        | Fold Change | p-value        | Fold Change |
| 6.37E-01     | -1.110      | 3.94E-02     | 1.383       | 3.59E-01       | -1.231      | 9.97E-01       | 1.001       |

**LMP1-with Inhibitors: Macropinocytosis (P = 1)**

**Symbol Entrez Gene Name**

ACTN4 actinin, alpha 4  
 ANKFY1 ankyrin repeat and FYVE domain containing 1  
 ITGA5 integrin, alpha 5 (fibronectin receptor, alpha polypeptide)  
 ITGB4 integrin, beta 4  
 MET MET proto-oncogene, receptor tyrosine kinase  
 PAK1 p21 protein (Cdc42/Rac)-activated kinase 1

| LMP1 no Inhs |             | LMP2 no Inhs |             | LMP1 with Inhs |             | LMP2 with Inhs |             |
|--------------|-------------|--------------|-------------|----------------|-------------|----------------|-------------|
| p-value      | Fold Change | p-value      | Fold Change | p-value        | Fold Change | p-value        | Fold Change |
| 3.46E-01     | 1.264       | 9.40E-01     | 1.023       | 3.67E-04       | 2.025       | 5.14E-01       | 1.040       |
| 2.94E-01     | -1.400      | 1.00E00      | 1.026       | 2.63E-02       | 1.360       | 9.71E-01       | -1.007      |
| 3.64E-01     | -2.172      | 1.00E00      | -3.726      | 4.33E-02       | -2.098      | 2.27E-02       | -2.119      |
| 5.06E-01     | -1.180      | 7.55E-01     | -1.092      | 3.98E-02       | -1.164      | 1.00E00        | -1.292      |
| 1.00E00      | 0.000       | 1.00E00      | 0.000       | 4.99E-02       | -1.277      | 6.91E-01       | 1.046       |
|              |             |              |             | 3.34E-02       | -1.594      | 1.00E00        |             |

**LMP2-with Inhibitors: Macropinocytosis (P = 1)**

**Symbol Entrez Gene Name**

ITGA5 integrin, alpha 5 (fibronectin receptor, alpha polypeptide)

| LMP1 no Inhs |             | LMP2 no Inhs |             | LMP1 with Inhs |             | LMP2 with Inhs |             |
|--------------|-------------|--------------|-------------|----------------|-------------|----------------|-------------|
| p-value      | Fold Change | p-value      | Fold Change | p-value        | Fold Change | p-value        | Fold Change |
| 3.64E-01     | -2.172      | 1.00E00      | -3.726      | 4.33E-02       | -2.098      | 2.27E-02       | -2.119      |



**Fc-gamma receptor-mediated phagocytosis in macrophages and monocytes**

**LMP1-no Inhibitors: FcR-Phagocytosis (P = 0.426)**

| Symbol | Entrez Gene Name                                    |
|--------|-----------------------------------------------------|
| ARPC4  | actin related protein 2/3 complex, subunit 4, 20kDa |

| LMP1 no Inhs |             | LMP2 no Inhs |             | LMP1 with Inhs |             | LMP2 with Inhs |             |
|--------------|-------------|--------------|-------------|----------------|-------------|----------------|-------------|
| p-value      | Fold Change | p-value      | Fold Change | p-value        | Fold Change | p-value        | Fold Change |
| 1.11E-02     | -1.511      | 9.32E-01     | -1.010      | 5.30E-01       | -1.042      | 2.83E-01       | 1.177       |

**LMP2-no Inhibitors: FcR-Phagocytosis (P = 0.180)**

| Symbol | Entrez Gene Name                      |
|--------|---------------------------------------|
| VAMP3  | vesicle-associated membrane protein 3 |

| LMP1 no Inhs |             | LMP2 no Inhs |             | LMP1 with Inhs |             | LMP2 with Inhs |             |
|--------------|-------------|--------------|-------------|----------------|-------------|----------------|-------------|
| p-value      | Fold Change | p-value      | Fold Change | p-value        | Fold Change | p-value        | Fold Change |
| 5.35E-01     | -1.358      | 1.14E-03     | -1.687      | 2.83E-01       | -1.167      | 5.43E-02       | 1.295       |

**LMP1-withInhibitors: FcR-Phagocytosis (P = 0.043)**

| Symbol | Entrez Gene Name                                                                        |
|--------|-----------------------------------------------------------------------------------------|
| ACTG1  | actin, gamma 1                                                                          |
| ARPC1A | actin related protein 2/3 complex, subunit 1A, 41kDa                                    |
| EZR    | ezrin                                                                                   |
| NCK1   | NCK adaptor protein 1                                                                   |
| PAK1   | p21 protein (Cdc42/Rac)-activated kinase 1                                              |
| RAC2   | ras-related C3 botulinum toxin substrate 2 (rho family, small GTP binding protein Rac2) |

| LMP1 no Inhs |             | LMP2 no Inhs |             | LMP1 with Inhs |             | LMP2 with Inhs |             |
|--------------|-------------|--------------|-------------|----------------|-------------|----------------|-------------|
| p-value      | Fold Change | p-value      | Fold Change | p-value        | Fold Change | p-value        | Fold Change |
| 4.38E-01     | 2.212       | 9.31E-01     | 1.090       | 6.29E-03       | 1.182       | 1.00E00        | -1.548      |
| 3.33E-01     | 1.922       | 7.89E-01     | 1.212       | 3.81E-02       | 1.382       | 2.37E-01       | -1.175      |
| 4.70E-01     | 1.533       | 6.72E-01     | 1.354       | 3.55E-02       | 2.326       | 9.76E-01       | -1.012      |
| 1.00E00      | 1.371       | 1.00E00      | 1.688       | 3.97E-03       | 1.850       | 3.49E-01       | 1.681       |
| 1.00E00      | 0.000       | 1.00E00      | 0.000       | 3.34E-02       | -1.594      | 1.00E00        |             |
|              |             |              |             | 1.04E-03       | 1.399       | 7.67E-02       | -1.210      |

**LMP2-with Inhibitors: FcR-Phagocytosis (P = 0.114)**

| Symbol  | Entrez Gene Name                                  |
|---------|---------------------------------------------------|
| ACTR2   | ARP2 actin-related protein 2 homolog (yeast)      |
| PXN     | paxillin                                          |
| RPS6KB1 | ribosomal protein S6 kinase, 70kDa, polypeptide 1 |
| TLN1    | talin 1                                           |

| LMP1 no Inhs |             | LMP2 no Inhs |             | LMP1 with Inhs |             | LMP2 with Inhs |             |
|--------------|-------------|--------------|-------------|----------------|-------------|----------------|-------------|
| p-value      | Fold Change | p-value      | Fold Change | p-value        | Fold Change | p-value        | Fold Change |
| 3.55E-01     | 1.594       | 9.05E-01     | -1.028      | 8.73E-01       | -1.010      | 4.13E-02       | -1.124      |
| 2.26E-01     | 1.287       | 1.27E-01     | -1.543      | 3.24E-01       | 1.546       | 1.68E-02       | -1.271      |
| 1.00E00      | 1.861       | 1.00E00      | 1.983       | 1.04E-01       | -1.675      | 3.62E-02       | -1.878      |
| 6.90E-01     | 1.081       | 1.64E-01     | -1.316      | 7.06E-02       | 1.063       | 2.74E-02       | -1.154      |
