# Supplementary material for: Global Proteomic Changes Induced by the Epstein-Barr Virus Oncoproteins Latent Membrane Protein 1 and 2A
Source: PubMed Central journal article supplement (PMC6016245; doi:10.1128/mbio.00959-18), 2018-06-19
Supplement: mbo003183928st3.pdf [file mbo003183928st3.pdf]

## Supplemental Table-3

| <b>LMP1-no Inhibitors: EIF2 signaling (P = 0.0046)</b> |                                                                     | <b>LMP1 no Inhs</b> |                    | <b>LMP2 no Inhs</b> |                    | <b>LMP1 with Inhs</b> |                    | <b>LMP2 with Inhs</b> |                    |
|--------------------------------------------------------|---------------------------------------------------------------------|---------------------|--------------------|---------------------|--------------------|-----------------------|--------------------|-----------------------|--------------------|
| <b>Symbol</b>                                          | <b>Entrez Gene Name</b>                                             | <b>p-value</b>      | <b>Fold Change</b> | <b>p-value</b>      | <b>Fold Change</b> | <b>p-value</b>        | <b>Fold Change</b> | <b>p-value</b>        | <b>Fold Change</b> |
| EIF2AK2                                                | eukaryotic translation initiation factor 2-alpha kinase 2           | 3.04E-02            | -1.756             | 5.90E-01            | 1.081              | 5.77E-01              | -1.088             | 3.84E-01              | -1.125             |
| EIF2B4                                                 | eukaryotic translation initiation factor 2B, subunit 4 delta, 67kDa | 1.95E-02            | 1.233              | 1.00E00             | 1.446              | 3.35E-01              | -1.208             | 5.09E-01              | -1.133             |
| EIF3L                                                  | eukaryotic translation initiation factor 3, subunit L               | 7.50E-04            | -1.578             | 3.03E-01            | -1.421             | 1.52E-01              | -1.223             | 1.01E-01              | -1.191             |
| EIF4A1                                                 | eukaryotic translation initiation factor 4A1                        | 2.22E-02            | -1.494             | 6.00E-01            | -1.108             | 5.36E-03              | -1.474             | 2.21E-03              | -1.518             |
| RPL12                                                  | ribosomal protein L12                                               | 2.67E-02            | -1.352             | 2.12E-01            | -1.700             | 8.90E-01              | 1.051              | 6.08E-01              | 1.225              |

  

| <b>LMP2-noinhibitors: EIF2 signaling (P = 0.342)</b> |                         | <b>LMP1 no Inhs</b> |                    | <b>LMP2 no Inhs</b> |                    | <b>LMP1 with Inhs</b> |                    | <b>LMP2 with Inhs</b> |                    |
|------------------------------------------------------|-------------------------|---------------------|--------------------|---------------------|--------------------|-----------------------|--------------------|-----------------------|--------------------|
| <b>Symbol</b>                                        | <b>Entrez Gene Name</b> | <b>p-value</b>      | <b>Fold Change</b> | <b>p-value</b>      | <b>Fold Change</b> | <b>p-value</b>        | <b>Fold Change</b> | <b>p-value</b>        | <b>Fold Change</b> |
| RPS25                                                | ribosomal protein S25   | 1.52E-01            | 1.140              | 3.99E-02            | 1.423              | 8.54E-01              | -1.043             | 4.58E-01              | -1.207             |

  

| <b>LMP1-with Inhibitors: EIF2 signaling (P = 0.00019)</b> |                                                                    | <b>LMP1 no Inhs</b> |                    | <b>LMP2 no Inhs</b> |                    | <b>LMP1 with Inhs</b> |                    | <b>LMP2 with Inhs</b> |                    |
|-----------------------------------------------------------|--------------------------------------------------------------------|---------------------|--------------------|---------------------|--------------------|-----------------------|--------------------|-----------------------|--------------------|
| <b>Symbol</b>                                             | <b>Entrez Gene Name</b>                                            | <b>p-value</b>      | <b>Fold Change</b> | <b>p-value</b>      | <b>Fold Change</b> | <b>p-value</b>        | <b>Fold Change</b> | <b>p-value</b>        | <b>Fold Change</b> |
| AGO2                                                      | argonaute RISC catalytic component 2                               | 1.00E00             | 1.578              | 1.00E00             | 1.280              | 1.64E-02              | -1.539             | 1.37E-01              | -1.335             |
| EIF2A                                                     | eukaryotic translation initiation factor 2A, 65kDa                 | 9.33E-01            | -1.021             | 3.74E-01            | 1.287              | 2.67E-02              | -1.316             | 5.59E-02              | -1.223             |
| EIF2S1                                                    | eukaryotic translation initiation factor 2, subunit 1 alpha, 35kDa | 1.87E-01            | 1.365              | 7.04E-01            | 1.067              | 2.93E-03              | -1.354             | 7.24E-01              | -1.028             |
| EIF2S3                                                    | eukaryotic translation initiation factor 2, subunit 3 gamma, 52kDa | 5.73E-01            | -1.064             | 7.36E-01            | 1.157              | 3.03E-02              | -1.424             | 3.71E-01              | -1.114             |
| EIF3B                                                     | eukaryotic translation initiation factor 3, subunit B              | 3.42E-01            | -1.386             | 8.48E-01            | 1.074              | 1.02E-02              | -1.676             | 2.12E-03              | -1.435             |
| EIF3C                                                     | eukaryotic translation initiation factor 3, subunit C              | 5.73E-01            | -1.271             | 7.02E-01            | -1.177             | 9.18E-03              | -1.354             | 1.15E-01              | -1.170             |
| EIF3E                                                     | eukaryotic translation initiation factor 3, subunit E              | 2.79E-01            | 1.270              | 5.54E-01            | -1.191             | 4.88E-02              | -1.981             | 2.96E-02              | -1.483             |
| EIF4A1                                                    | eukaryotic translation initiation factor 4A1                       | 2.22E-02            | -1.494             | 6.00E-01            | -1.108             | 5.36E-03              | -1.474             | 2.21E-03              | -1.518             |
| EIF4G3                                                    | eukaryotic translation initiation factor 4 gamma, 3                | 1.00E00             | -1.319             | 1.00E00             | 1.355              | 2.49E-02              | 1.703              | 1.09E-01              | -1.517             |
| MAP2K2                                                    | mitogen-activated protein kinase kinase 2                          | 1.00E00             | -1.030             | 1.00E00             | 1.079              | 2.57E-02              | -1.397             | 2.02E-02              | -1.306             |
| PPP1CC                                                    | protein phosphatase 1, catalytic subunit, gamma isozyme            | 1.00E00             | 0.000              | 1.00E00             | -3.795             | 3.37E-02              | 1.428              | 2.43E-03              | 1.450              |
| RPL8                                                      | ribosomal protein L8                                               | 6.23E-01            | -1.990             | 8.60E-01            | -1.250             | 2.05E-02              | -1.439             | 6.73E-03              | -1.280             |
| RPL9                                                      | ribosomal protein L9                                               | 2.39E-01            | -1.319             | 4.97E-01            | -1.221             | 1.47E-03              | -1.543             | 2.01E-02              | -1.259             |
| RPL31                                                     | ribosomal protein L31                                              | 9.13E-01            | 1.098              | 9.27E-01            | -1.066             | 2.51E-02              | -1.318             | 7.37E-02              | -1.195             |
| RPL32                                                     | ribosomal protein L32                                              | 6.55E-01            | -1.348             | 7.98E-01            | -1.100             | 6.12E-03              | -1.235             | 1.22E-01              | -1.203             |

  

| <b>LMP2-with Inhibitors: EIF2 signaling (P = 1.656 x 10<sup>-5</sup>)</b> |                                                         | <b>LMP1 no Inhs</b> |                    | <b>LMP2 no Inhs</b> |                    | <b>LMP1 with Inhs</b> |                    | <b>LMP2 with Inhs</b> |                    |
|---------------------------------------------------------------------------|---------------------------------------------------------|---------------------|--------------------|---------------------|--------------------|-----------------------|--------------------|-----------------------|--------------------|
| <b>Symbol</b>                                                             | <b>Entrez Gene Name</b>                                 | <b>p-value</b>      | <b>Fold Change</b> | <b>p-value</b>      | <b>Fold Change</b> | <b>p-value</b>        | <b>Fold Change</b> | <b>p-value</b>        | <b>Fold Change</b> |
| EIF5                                                                      | eukaryotic translation initiation factor 5              | 3.46E-01            | 1.602              | 6.89E-01            | 1.275              | 1.22E-01              | -1.603             | 4.54E-02              | -1.458             |
| EIF3B                                                                     | eukaryotic translation initiation factor 3, subunit B   | 3.42E-01            | -1.386             | 8.48E-01            | 1.074              | 1.02E-02              | -1.676             | 2.12E-03              | -1.435             |
| EIF3E                                                                     | eukaryotic translation initiation factor 3, subunit E   | 2.79E-01            | 1.270              | 5.54E-01            | -1.191             | 4.88E-02              | -1.981             | 2.96E-02              | -1.483             |
| EIF3K                                                                     | eukaryotic translation initiation factor 3, subunit K   | 4.74E-01            | -1.416             | 6.92E-01            | -1.129             | 3.06E-01              | -1.210             | 4.08E-02              | -1.481             |
| EIF3M                                                                     | eukaryotic translation initiation factor 3, subunit M   | 8.12E-01            | -1.073             | 1.13E-01            | -1.587             | 2.70E-01              | -1.202             | 4.54E-02              | -1.495             |
| EIF4A1                                                                    | eukaryotic translation initiation factor 4A1            | 2.22E-02            | -1.494             | 6.00E-01            | -1.108             | 5.36E-03              | -1.474             | 2.21E-03              | -1.518             |
| EIF4A2                                                                    | eukaryotic translation initiation factor 4A2            | 1.00E00             | 0.000              | 1.00E00             | 0.000              | 5.80E-01              | 1.224              | 4.97E-02              | -2.874             |
| MAP2K2                                                                    | mitogen-activated protein kinase kinase 2               | 1.00E00             | -1.030             | 1.00E00             | 1.079              | 2.57E-02              | -1.397             | 2.02E-02              | -1.306             |
| PPP1CC                                                                    | protein phosphatase 1, catalytic subunit, gamma isozyme | 1.00E00             | 0.000              | 1.00E00             | -3.795             | 3.37E-02              | 1.428              | 2.43E-03              | 1.450              |
| RPL8                                                                      | ribosomal protein L8                                    | 6.23E-01            | -1.990             | 8.60E-01            | -1.250             | 2.05E-02              | -1.439             | 6.73E-03              | -1.280             |
| RPL9                                                                      | ribosomal protein L9                                    | 2.39E-01            | -1.319             | 4.97E-01            | -1.221             | 1.47E-03              | -1.543             | 2.01E-02              | -1.259             |
| RPL26                                                                     | ribosomal protein L26                                   | 6.22E-01            | -1.402             | 8.23E-01            | 1.176              | 5.30E-01              | 1.102              | 1.21E-02              | 1.300              |
| RPS27                                                                     | ribosomal protein S27                                   | 8.41E-01            | 1.058              | 2.67E-01            | -2.025             | 4.95E-01              | 1.154              | 3.28E-02              | 1.640              |
| RPS15A                                                                    | ribosomal protein S15a                                  | 6.98E-02            | -1.702             | 3.15E-01            | -1.182             | 9.19E-01              | -1.093             | 2.40E-03              | 1.238              |

| <b>LMP1-no Inhibitors: eIF4-p70S6K signaling (P = 0.056)</b> |                                                                     | <b>LMP1 no Inhs</b> |                    | <b>LMP2 no Inhs</b> |                    | <b>LMP1 with Inhs</b> |                    | <b>LMP2 with Inhs</b> |                    |
|--------------------------------------------------------------|---------------------------------------------------------------------|---------------------|--------------------|---------------------|--------------------|-----------------------|--------------------|-----------------------|--------------------|
| <b>Symbol</b>                                                | <b>Entrez Gene Name</b>                                             | <b>p-value</b>      | <b>Fold Change</b> | <b>p-value</b>      | <b>Fold Change</b> | <b>p-value</b>        | <b>Fold Change</b> | <b>p-value</b>        | <b>Fold Change</b> |
| EIF2B4                                                       | eukaryotic translation initiation factor 2B, subunit 4 delta, 67kDa | 1.95E-02            | 1.233              | 1.00E00             | 1.446              | 3.35E-01              | -1.208             | 5.09E-01              | -1.133             |
| EIF3L                                                        | eukaryotic translation initiation factor 3, subunit L               | 7.50E-04            | -1.578             | 3.03E-01            | -1.421             | 1.52E-01              | -1.223             | 1.01E-01              | -1.191             |
| EIF4A1                                                       | eukaryotic translation initiation factor 4A1                        | 2.22E-02            | -1.494             | 6.00E-01            | -1.108             | 5.36E-03              | -1.474             | 2.21E-03              | -1.518             |

  

| <b>LMP2-no Inhibitors: eIF4-p70S6K signaling (P = 0.284)</b> |                         | <b>LMP1 no Inhs</b> |                    | <b>LMP2 no Inhs</b> |                    | <b>LMP1 with Inhs</b> |                    | <b>LMP2 with Inhs</b> |                    |
|--------------------------------------------------------------|-------------------------|---------------------|--------------------|---------------------|--------------------|-----------------------|--------------------|-----------------------|--------------------|
| <b>Symbol</b>                                                | <b>Entrez Gene Name</b> | <b>p-value</b>      | <b>Fold Change</b> | <b>p-value</b>      | <b>Fold Change</b> | <b>p-value</b>        | <b>Fold Change</b> | <b>p-value</b>        | <b>Fold Change</b> |
| RPS25                                                        | ribosomal protein S25   | 1.52E-01            | 1.140              | 3.99E-02            | 1.423              | 8.54E-01              | -1.043             | 4.58E-01              | -1.207             |

  

| <b>LMP1-with Inhibitors: eIF4-p70S6K signaling (P = 0.00256)</b> |                                                                    | <b>LMP1 no Inhs</b> |                    | <b>LMP2 no Inhs</b> |                    | <b>LMP1 with Inhs</b> |                    | <b>LMP2 with Inhs</b> |                    |
|------------------------------------------------------------------|--------------------------------------------------------------------|---------------------|--------------------|---------------------|--------------------|-----------------------|--------------------|-----------------------|--------------------|
| <b>Symbol</b>                                                    | <b>Entrez Gene Name</b>                                            | <b>p-value</b>      | <b>Fold Change</b> | <b>p-value</b>      | <b>Fold Change</b> | <b>p-value</b>        | <b>Fold Change</b> | <b>p-value</b>        | <b>Fold Change</b> |
| AGO2                                                             | argonaute RISC catalytic component 2                               | 1.00E00             | 1.578              | 1.00E00             | 1.280              | 1.64E-02              | -1.539             | 1.37E-01              | -1.335             |
| EIF2A                                                            | eukaryotic translation initiation factor 2A, 65kDa                 | 9.33E-01            | -1.021             | 3.74E-01            | 1.287              | 2.67E-02              | -1.316             | 5.59E-02              | -1.223             |
| EIF2S1                                                           | eukaryotic translation initiation factor 2, subunit 1 alpha, 35kDa | 1.87E-01            | 1.365              | 7.04E-01            | 1.067              | 2.93E-03              | -1.354             | 7.24E-01              | -1.028             |
| EIF2S3                                                           | eukaryotic translation initiation factor 2, subunit 3 gamma, 52kDa | 5.73E-01            | -1.064             | 7.36E-01            | 1.157              | 3.03E-02              | -1.424             | 3.71E-01              | -1.114             |
| EIF3B                                                            | eukaryotic translation initiation factor 3, subunit B              | 3.42E-01            | -1.386             | 8.48E-01            | 1.074              | 1.02E-02              | -1.676             | 2.12E-03              | -1.435             |
| EIF3C                                                            | eukaryotic translation initiation factor 3, subunit C              | 5.73E-01            | -1.271             | 7.02E-01            | -1.177             | 9.18E-03              | -1.354             | 1.15E-01              | -1.170             |
| EIF3E                                                            | eukaryotic translation initiation factor 3, subunit E              | 2.79E-01            | 1.270              | 5.54E-01            | -1.191             | 4.88E-02              | -1.981             | 2.96E-02              | -1.483             |
| EIF4A1                                                           | eukaryotic translation initiation factor 4A1                       | 2.22E-02            | -1.494             | 6.00E-01            | -1.108             | 5.36E-03              | -1.474             | 2.21E-03              | -1.518             |
| EIF4G3                                                           | eukaryotic translation initiation factor 4 gamma, 3                | 1.00E00             | -1.319             | 1.00E00             | 1.355              | 2.49E-02              | 1.703              | 1.09E-01              | -1.517             |
| ITGA5                                                            | integrin, alpha 5 (fibronectin receptor, alpha polypeptide)        | 3.64E-01            | -2.172             | 1.00E00             | -3.726             | 4.33E-02              | -2.098             | 2.27E-02              | -2.119             |
| MAP2K2                                                           | mitogen-activated protein kinase kinase 2                          | 1.00E00             | -1.030             | 1.00E00             | 1.079              | 2.57E-02              | -1.397             | 2.02E-02              | -1.306             |

  

| <b>LMP2-with Inhibitors: eIF4-p70S6K signaling (P = 6.5 x 10<sup>-6</sup>)</b> |                                                               | <b>LMP1 no Inhs</b> |                    | <b>LMP2 no Inhs</b> |                    | <b>LMP1 with Inhs</b> |                    | <b>LMP2 with Inhs</b> |                    |
|--------------------------------------------------------------------------------|---------------------------------------------------------------|---------------------|--------------------|---------------------|--------------------|-----------------------|--------------------|-----------------------|--------------------|
| <b>Symbol</b>                                                                  | <b>Entrez Gene Name</b>                                       | <b>p-value</b>      | <b>Fold Change</b> | <b>p-value</b>      | <b>Fold Change</b> | <b>p-value</b>        | <b>Fold Change</b> | <b>p-value</b>        | <b>Fold Change</b> |
| EIF3B                                                                          | eukaryotic translation initiation factor 3, subunit B         | 3.42E-01            | -1.386             | 8.48E-01            | 1.074              | 1.02E-02              | -1.676             | 2.12E-03              | -1.435             |
| EIF3E                                                                          | eukaryotic translation initiation factor 3, subunit E         | 2.79E-01            | 1.270              | 5.54E-01            | -1.191             | 4.88E-02              | -1.981             | 2.96E-02              | -1.483             |
| EIF3K                                                                          | eukaryotic translation initiation factor 3, subunit K         | 4.74E-01            | -1.416             | 6.92E-01            | -1.129             | 3.06E-01              | -1.210             | 4.08E-02              | -1.481             |
| EIF3M                                                                          | eukaryotic translation initiation factor 3, subunit M         | 8.12E-01            | -1.073             | 1.13E-01            | -1.587             | 2.70E-01              | -1.202             | 4.54E-02              | -1.495             |
| EIF4A1                                                                         | eukaryotic translation initiation factor 4A1                  | 2.22E-02            | -1.494             | 6.00E-01            | -1.108             | 5.36E-03              | -1.474             | 2.21E-03              | -1.518             |
| EIF4A2                                                                         | eukaryotic translation initiation factor 4A2                  | 1.00E00             | 0.000              | 1.00E00             | 0.000              | 5.80E-01              | 1.224              | 4.97E-02              | -2.874             |
| EIF4EBP2                                                                       | eukaryotic translation initiation factor 4E binding protein 2 |                     |                    |                     |                    | 2.53E-01              | 1.480              | 2.60E-02              | -4.372             |
| ITGA5                                                                          | integrin, alpha 5 (fibronectin receptor, alpha polypeptide)   | 3.64E-01            | -2.172             | 1.00E00             | -3.726             | 4.33E-02              | -2.098             | 2.27E-02              | -2.119             |
| MAP2K2                                                                         | mitogen-activated protein kinase kinase 2                     | 1.00E00             | -1.030             | 1.00E00             | 1.079              | 2.57E-02              | -1.397             | 2.02E-02              | -1.306             |
| PPP2R2A                                                                        | protein phosphatase 2, regulatory subunit B, alpha            | 4.81E-01            | 1.459              | 8.73E-01            | 1.147              | 2.85E-01              | -1.232             | 7.48E-03              | -1.358             |
| RPS27                                                                          | ribosomal protein S27                                         | 8.41E-01            | 1.058              | 2.67E-01            | -2.025             | 4.95E-01              | 1.154              | 3.28E-02              | 1.640              |
| RPS15A                                                                         | ribosomal protein S15a                                        | 6.98E-02            | -1.702             | 3.15E-01            | -1.182             | 9.19E-01              | -1.093             | 2.40E-03              | 1.238              |
| RPS6KB1                                                                        | ribosomal protein S6 kinase, 70kDa, polypeptide 1             | 1.00E00             | 1.861              | 1.00E00             | 1.983              | 1.04E-01              | -1.675             | 3.62E-02              | -1.878             |

|                                                              |                                                                    | LMP1 no Inhs |             | LMP2 no Inhs |             | LMP1 with Inhs |             | LMP2 with Inhs |             |
|--------------------------------------------------------------|--------------------------------------------------------------------|--------------|-------------|--------------|-------------|----------------|-------------|----------------|-------------|
| Symbol                                                       | Entrez Gene Name                                                   | p-value      | Fold Change | p-value      | Fold Change | p-value        | Fold Change | p-value        | Fold Change |
| <b>LMP1-no Inhibitor: Expression of mRNA (P = 1)</b>         |                                                                    |              |             |              |             |                |             |                |             |
| AGO2                                                         | argonaute RISC catalytic component 2                               | 1.00E+00     | 1.578       | 1.00E+00     | 1.28        | 1.64E-02       | -1.539      | 1.37E-01       | -1.335      |
| DARS                                                         | aspartyl-tRNA synthetase                                           | 9.00E-01     | -1.035      | 8.33E-01     | 1.067       | 4.73E-02       | -1.295      | 2.76E-01       | -1.181      |
| EIF2A                                                        | eukaryotic translation initiation factor 2A, 65kDa                 | 9.33E-01     | -1.021      | 3.74E-01     | 1.287       | 2.67E-02       | -1.316      | 5.59E-02       | -1.223      |
| EIF2S1                                                       | eukaryotic translation initiation factor 2, subunit 1 alpha, 35kDa | 1.87E-01     | 1.365       | 7.04E-01     | 1.067       | 2.93E-03       | -1.354      | 7.24E-01       | -1.028      |
| EIF2S3                                                       | eukaryotic translation initiation factor 2, subunit 3 gamma, 52kDa | 5.73E-01     | -1.064      | 7.36E-01     | 1.157       | 3.03E-02       | -1.424      | 3.71E-01       | -1.114      |
| EIF3B                                                        | eukaryotic translation initiation factor 3, subunit B              | 3.42E-01     | -1.386      | 8.48E-01     | 1.074       | 1.02E-02       | -1.676      | 2.12E-03       | -1.435      |
| EIF3C                                                        | eukaryotic translation initiation factor 3, subunit C              | 5.73E-01     | -1.271      | 7.02E-01     | -1.177      | 9.18E-03       | -1.354      | 1.15E-01       | -1.17       |
| EIF3E                                                        | eukaryotic translation initiation factor 3, subunit E              | 2.79E-01     | 1.27        | 5.54E-01     | -1.191      | 4.88E-02       | -1.981      | 2.96E-02       | -1.483      |
| EIF4G3                                                       | eukaryotic translation initiation factor 4 gamma, 3                | 1.00E+00     | -1.319      | 1.00E+00     | 1.355       | 2.49E-02       | 1.703       | 1.09E-01       | -1.517      |
| EIF4H                                                        | eukaryotic translation initiation factor 4H                        | 4.51E-01     | -1.362      | 5.80E-01     | -1.527      | 2.09E-03       | -1.36       | 1.23E-02       | -1.316      |
| EPRS                                                         | glutamyl-prolyl-tRNA synthetase                                    | 8.40E-02     | -1.28       | 4.72E-01     | -1.176      | 3.69E-02       | -1.214      | 6.05E-01       | 1.029       |
| FARSB                                                        | phenylalanyl-tRNA synthetase, beta subunit                         | 1.46E-02     | -1.791      | 5.16E-01     | -1.186      | 3.76E-02       | -1.225      | 8.77E-01       | 1.013       |
| FXR1                                                         | fragile X mental retardation, autosomal homolog 1                  | 5.43E-01     | -1.461      | 8.26E-01     | 1.117       | 1.51E-02       | -1.295      | 8.38E-03       | -1.647      |
| GRB7                                                         | growth factor receptor-bound protein 7                             | 1.00E+00     | 0           | 1.00E+00     | 0           | 3.20E-02       | 1.867       | 1.00E+00       | 1.058       |
| GTF2H3                                                       | general transcription factor IIH, polypeptide 3, 34kDa             |              |             |              |             | 1.85E-02       | -2.117      | 3.93E-01       | -1.393      |
| PABPC4                                                       | poly(A) binding protein, cytoplasmic 4 (inducible form)            | 7.73E-01     | -1.126      | 7.92E-01     | 1.027       | 6.62E-03       | -1.267      | 7.58E-01       | -1.046      |
| TIMP3                                                        | TIMP metalloproteinase inhibitor 3                                 | 1.00E+00     | -2.697      | 1.00E+00     | 0           | 4.13E-03       | -1.852      | 4.38E-01       | -1.628      |
| <b>LMP2-no Inhibitor: Expression of mRNA (P = 1)</b>         |                                                                    |              |             |              |             |                |             |                |             |
| <b>LMP1-with Inhibitor: Expression of mRNA (P = 0.00069)</b> |                                                                    |              |             |              |             |                |             |                |             |
| <b>LMP2-with Inhibitor: Expression of mRNA (P = 0.00148)</b> |                                                                    |              |             |              |             |                |             |                |             |
| ATF1                                                         | activating transcription factor 1                                  |              |             |              |             | 5.54E-01       | 1.108       | 3.67E-02       | 1.33        |
| DAPK3                                                        | death-associated protein kinase 3                                  | 1.00E+00     | 0           | 1.00E+00     | 0           | 2.18E-01       | 1.285       | 4.16E-02       | -1.518      |
| EIF5                                                         | eukaryotic translation initiation factor 5                         | 3.46E-01     | 1.602       | 6.89E-01     | 1.275       | 1.22E-01       | -1.603      | 4.54E-02       | -1.458      |
| EIF3B                                                        | eukaryotic translation initiation factor 3, subunit B              | 3.42E-01     | -1.386      | 8.48E-01     | 1.074       | 1.02E-02       | -1.676      | 2.12E-03       | -1.435      |
| EIF3E                                                        | eukaryotic translation initiation factor 3, subunit E              | 2.79E-01     | 1.27        | 5.54E-01     | -1.191      | 4.88E-02       | -1.981      | 2.96E-02       | -1.483      |
| EIF3K                                                        | eukaryotic translation initiation factor 3, subunit K              | 4.74E-01     | -1.416      | 6.92E-01     | -1.129      | 3.06E-01       | -1.21       | 4.08E-02       | -1.481      |
| EIF4A2                                                       | eukaryotic translation initiation factor 4A2                       | 1.00E+00     | 0           | 1.00E+00     | 0           | 5.80E-01       | 1.224       | 4.97E-02       | -2.874      |
| EIF4EBP2                                                     | eukaryotic translation initiation factor 4E binding protein 2      |              |             |              |             | 2.53E-01       | 1.48        | 2.60E-02       | -4.372      |
| EIF4H                                                        | eukaryotic translation initiation factor 4H                        | 4.51E-01     | -1.362      | 5.80E-01     | -1.527      | 2.09E-03       | -1.36       | 1.23E-02       | -1.316      |
| FMR1                                                         | fragile X mental retardation 1                                     | 7.18E-02     | -2.219      | 3.05E-01     | -1.654      | 3.63E-01       | -1.454      | 3.98E-02       | -1.65       |
| FXR1                                                         | fragile X mental retardation, autosomal homolog 1                  | 5.43E-01     | -1.461      | 8.26E-01     | 1.117       | 1.51E-02       | -1.295      | 8.38E-03       | -1.647      |
| IGF2BP3                                                      | insulin-like growth factor 2 mRNA binding protein 3                | 7.30E-01     | 1.216       | 3.56E-03     | -1.963      | 5.05E-01       | -1.102      | 1.29E-02       | -2.325      |
| MTIF3                                                        | mitochondrial translational initiation factor 3                    |              |             |              |             | 4.09E-01       | 1.248       | 2.99E-02       | 1.596       |

**LMP1-no Inhibitors: Translation of Protein (P = 0.00025)**

| Symbol  | Entrez Gene Name                                                    | LMP1 no Inhs |             | LMP2 no Inhs |             | LMP1 with Inhs |             | LMP2 with Inhs |             |
|---------|---------------------------------------------------------------------|--------------|-------------|--------------|-------------|----------------|-------------|----------------|-------------|
|         |                                                                     | p-value      | Fold Change | p-value      | Fold Change | p-value        | Fold Change | p-value        | Fold Change |
| EIF2AK2 | eukaryotic translation initiation factor 2-alpha kinase 2           | 3.04E-02     | -1.756      | 5.90E-01     | 1.081       | 5.77E-01       | -1.088      | 3.84E-01       | -1.125      |
| EIF2B4  | eukaryotic translation initiation factor 2B, subunit 4 delta, 67kDa | 1.95E-02     | 1.233       | 1.00E+00     | 1.446       | 3.35E-01       | -1.208      | 5.09E-01       | -1.133      |
| EIF3L   | eukaryotic translation initiation factor 3, subunit L               | 7.50E-04     | -1.578      | 3.03E-01     | -1.421      | 1.52E-01       | -1.223      | 1.01E-01       | -1.191      |
| EIF4A1  | eukaryotic translation initiation factor 4A1                        | 2.22E-02     | -1.494      | 6.00E-01     | -1.108      | 5.36E-03       | -1.474      | 2.21E-03       | -1.518      |
| FARSB   | phenylalanyl-tRNA synthetase, beta subunit                          | 1.46E-02     | -1.791      | 5.16E-01     | -1.186      | 3.76E-02       | -1.225      | 8.77E-01       | 1.013       |
| HSPB1   | heat shock 27kDa protein 1                                          | 1.20E-02     | 3.427       | 2.30E-01     | 1.936       | 2.29E-01       | 1.449       | 9.29E-01       | -1.043      |
| NCBP1   | nuclear cap binding protein subunit 1, 80kDa                        | 3.83E-02     | -2.567      | 2.13E-01     | -2.049      | 6.56E-01       | 1.111       | 5.33E-01       | -1.062      |
| TIA1    | TIA1 cytotoxic granule-associated RNA binding protein               | 2.69E-02     | 1.805       | 1.00E+00     | 1.963       | 9.38E-01       | -1.024      | 6.20E-01       | 1.141       |

**LMP2-no Inhibitors: Translation of Protein (P = 1)**

| Symbol | Entrez Gene Name | LMP1 no Inhs | LMP2 no Inhs | LMP1 with Inhs | LMP2 with Inhs |
|--------|------------------|--------------|--------------|----------------|----------------|
| none   |                  |              |              |                |                |

**LMP1-with Inhibitors: Translation of Protein (P = 3.63 x 10<sup>-5</sup>)**

| Symbol   | Entrez Gene Name                                                   | LMP1 no Inhs |             | LMP2 no Inhs |             | LMP1 with Inhs |             | LMP2 with Inhs |             |
|----------|--------------------------------------------------------------------|--------------|-------------|--------------|-------------|----------------|-------------|----------------|-------------|
|          |                                                                    | p-value      | Fold Change | p-value      | Fold Change | p-value        | Fold Change | p-value        | Fold Change |
| AGO2     | argonaute RISC catalytic component 2                               | 1.00E+00     | 1.578       | 1.00E+00     | 1.28        | 1.64E-02       | -1.539      | 1.37E-01       | -1.335      |
| DARS     | aspartyl-tRNA synthetase                                           | 9.00E-01     | -1.035      | 8.33E-01     | 1.067       | 4.73E-02       | -1.295      | 2.76E-01       | -1.181      |
| EIF2A    | eukaryotic translation initiation factor 2A, 65kDa                 | 9.33E-01     | -1.021      | 3.74E-01     | 1.287       | 2.67E-02       | -1.316      | 5.59E-02       | -1.223      |
| EIF2S1   | eukaryotic translation initiation factor 2, subunit 1 alpha, 35kDa | 1.87E-01     | 1.365       | 7.04E-01     | 1.067       | 2.93E-03       | -1.354      | 7.24E-01       | -1.028      |
| EIF2S3   | eukaryotic translation initiation factor 2, subunit 3 gamma, 52kDa | 5.73E-01     | -1.064      | 7.36E-01     | 1.157       | 3.03E-02       | -1.424      | 3.71E-01       | -1.114      |
| EIF3B    | eukaryotic translation initiation factor 3, subunit B              | 3.42E-01     | -1.386      | 8.48E-01     | 1.074       | 1.02E-02       | -1.676      | 2.12E-03       | -1.435      |
| EIF3C    | eukaryotic translation initiation factor 3, subunit C              | 5.73E-01     | -1.271      | 7.02E-01     | -1.177      | 9.18E-03       | -1.354      | 1.15E-01       | -1.17       |
| EIF3E    | eukaryotic translation initiation factor 3, subunit E              | 2.79E-01     | 1.27        | 5.54E-01     | -1.191      | 4.88E-02       | -1.981      | 2.96E-02       | -1.483      |
| EIF4A1   | eukaryotic translation initiation factor 4A1                       | 2.22E-02     | -1.494      | 6.00E-01     | -1.108      | 5.36E-03       | -1.474      | 2.21E-03       | -1.518      |
| EIF4G3   | eukaryotic translation initiation factor 4 gamma, 3                | 1.00E+00     | -1.319      | 1.00E+00     | 1.355       | 2.49E-02       | 1.703       | 1.09E-01       | -1.517      |
| EIF4H    | eukaryotic translation initiation factor 4H                        | 4.51E-01     | -1.362      | 5.80E-01     | -1.527      | 2.09E-03       | -1.36       | 1.23E-02       | -1.316      |
| EPRS     | glutamyl-prolyl-tRNA synthetase                                    | 8.40E-02     | -1.28       | 4.72E-01     | -1.176      | 3.69E-02       | -1.214      | 6.05E-01       | 1.029       |
| FARSB    | phenylalanyl-tRNA synthetase, beta subunit                         | 1.46E-02     | -1.791      | 5.16E-01     | -1.186      | 3.76E-02       | -1.225      | 8.77E-01       | 1.013       |
| FXR1     | fragile X mental retardation, autosomal homolog 1                  | 5.43E-01     | -1.461      | 8.26E-01     | 1.117       | 1.51E-02       | -1.295      | 8.38E-03       | -1.647      |
| GRB7     | growth factor receptor-bound protein 7                             | 1.00E+00     | 0           | 1.00E+00     | 0           | 3.20E-02       | 1.867       | 1.00E+00       | 1.058       |
| GTF2H3   | general transcription factor IIH, polypeptide 3, 34kDa             |              |             |              |             | 1.85E-02       | -2.117      | 3.93E-01       | -1.393      |
| HNRNPK   | heterogeneous nuclear ribonucleoprotein K                          | 6.23E-01     | 1.079       | 6.77E-01     | 1.057       | 1.97E-02       | -1.205      | 3.08E-01       | -2.032      |
| HSPA1A/H | heat shock 70kDa protein 1A                                        | 1.43E-01     | 1.284       | 3.50E-01     | 1.333       | 2.34E-03       | -1.242      | 1.93E-01       | -1.064      |
| NCK1     | NCK adaptor protein 1                                              | 1.00E+00     | 1.371       | 1.00E+00     | 1.688       | 3.97E-03       | 1.85        | 3.49E-01       | 1.681       |
| NXF1     | nuclear RNA export factor 1                                        | 3.09E-01     | 2.024       | 6.23E-02     | 1.906       | 1.52E-02       | -1.445      | 1.41E-01       | -1.309      |
| PABPC4   | poly(A) binding protein, cytoplasmic 4 (inducible form)            | 7.73E-01     | -1.126      | 7.92E-01     | 1.027       | 6.62E-03       | -1.267      | 7.58E-01       | -1.046      |

**LMP2-with Inhibitors: Translation of Protein (P = 1.11 x 10<sup>-5</sup>)**

| Symbol   | Entrez Gene Name                                              | LMP1 no Inhs |             | LMP2 no Inhs |             | LMP1 with Inhs |             | LMP2 with Inhs |             |
|----------|---------------------------------------------------------------|--------------|-------------|--------------|-------------|----------------|-------------|----------------|-------------|
|          |                                                               | p-value      | Fold Change | p-value      | Fold Change | p-value        | Fold Change | p-value        | Fold Change |
| BPNT1    | 3'(2'), 5'-bisphosphate nucleotidase 1                        | 8.47E-01     | 1.04        | 5.96E-01     | 1.109       | 7.85E-02       | 1.155       | 4.49E-02       | 1.199       |
| DAPK3    | death-associated protein kinase 3                             | 1.00E+00     | 0           | 1.00E+00     | 0           | 2.18E-01       | 1.285       | 4.16E-02       | -1.518      |
| EIF5     | eukaryotic translation initiation factor 5                    | 3.46E-01     | 1.602       | 6.89E-01     | 1.275       | 1.22E-01       | -1.603      | 4.54E-02       | -1.458      |
| EIF3B    | eukaryotic translation initiation factor 3, subunit B         | 3.42E-01     | -1.386      | 8.48E-01     | 1.074       | 1.02E-02       | -1.676      | 2.12E-03       | -1.435      |
| EIF3E    | eukaryotic translation initiation factor 3, subunit E         | 2.79E-01     | 1.27        | 5.54E-01     | -1.191      | 4.88E-02       | -1.981      | 2.96E-02       | -1.483      |
| EIF3K    | eukaryotic translation initiation factor 3, subunit K         | 4.74E-01     | -1.416      | 6.92E-01     | -1.129      | 3.06E-01       | -1.21       | 4.08E-02       | -1.481      |
| EIF4A1   | eukaryotic translation initiation factor 4A1                  | 2.22E-02     | -1.494      | 6.00E-01     | -1.108      | 5.36E-03       | -1.474      | 2.21E-03       | -1.518      |
| EIF4A2   | eukaryotic translation initiation factor 4A2                  | 1.00E+00     | 0           | 1.00E+00     | 0           | 5.80E-01       | 1.224       | 4.97E-02       | -2.874      |
| EIF4EBP2 | eukaryotic translation initiation factor 4E binding protein 2 |              |             |              |             | 2.53E-01       | 1.48        | 2.60E-02       | -4.372      |

|         |                                                     |          |        |          |        |          |        |          |        |
|---------|-----------------------------------------------------|----------|--------|----------|--------|----------|--------|----------|--------|
| EIF4H   | eukaryotic translation initiation factor 4H         | 4.51E-01 | -1.362 | 5.80E-01 | -1.527 | 2.09E-03 | -1.36  | 1.23E-02 | -1.316 |
| FMR1    | fragile X mental retardation 1                      | 7.18E-02 | -2.219 | 3.05E-01 | -1.654 | 3.63E-01 | -1.454 | 3.98E-02 | -1.65  |
| FXR1    | fragile X mental retardation, autosomal homolog 1   | 5.43E-01 | -1.461 | 8.26E-01 | 1.117  | 1.51E-02 | -1.295 | 8.38E-03 | -1.647 |
| IGF2BP3 | insulin-like growth factor 2 mRNA binding protein 3 | 7.30E-01 | 1.216  | 3.56E-03 | -1.963 | 5.05E-01 | -1.102 | 1.29E-02 | -2.325 |
| MTIF3   | mitochondrial translational initiation factor 3     |          |        |          |        | 4.09E-01 | 1.248  | 2.99E-02 | 1.596  |
| MTRF1   | mitochondrial translational release factor 1        | 1.00E+00 | 0      | 1.00E+00 | 0      | 3.14E-01 | 1.37   | 4.93E-02 | -2.68  |
| RHEB    | Ras homolog enriched in brain                       | 1.00E+00 | 0      | 1.00E+00 | 0      | 4.60E-01 | -1.64  | 3.30E-02 | -1.975 |
| RPS6KB1 | ribosomal protein S6 kinase, 70kDa, polypeptide 1   | 1.00E+00 | 1.861  | 1.00E+00 | 1.983  | 1.04E-01 | -1.675 | 3.62E-02 | -1.878 |
| STAU1   | staufen double-stranded RNA binding protein 1       | 2.56E-01 | 1.342  | 4.38E-01 | 1.344  | 4.04E-01 | 1.111  | 3.33E-02 | -1.379 |

**LMP1-noInhs\_Translation of mRNA (P = 7.45 x 10<sup>-5</sup>)**

| Symbol  | Entrez Gene Name                                                    | LMP1 no Inhs |             | LMP2 no Inhs |             | LMP1 with Inhs |             | LMP2 with Inhs |             |
|---------|---------------------------------------------------------------------|--------------|-------------|--------------|-------------|----------------|-------------|----------------|-------------|
|         |                                                                     | p-value      | Fold Change | p-value      | Fold Change | p-value        | Fold Change | p-value        | Fold Change |
| EIF2AK2 | eukaryotic translation initiation factor 2-alpha kinase 2           | 3.04E-02     | -1.756      | 5.90E-01     | 1.081       | 5.77E-01       | -1.088      | 3.84E-01       | -1.125      |
| EIF2B4  | eukaryotic translation initiation factor 2B, subunit 4 delta, 67kDa | 1.95E-02     | 1.233       | 1.00E+00     | 1.446       | 3.35E-01       | -1.208      | 5.09E-01       | -1.133      |
| EIF3L   | eukaryotic translation initiation factor 3, subunit L               | 7.50E-04     | -1.578      | 3.03E-01     | -1.421      | 1.52E-01       | -1.223      | 1.01E-01       | -1.191      |
| FARSB   | phenylalanyl-tRNA synthetase, beta subunit                          | 1.46E-02     | -1.791      | 5.16E-01     | -1.186      | 3.76E-02       | -1.225      | 8.77E-01       | 1.013       |
| HSPB1   | heat shock 27kDa protein 1                                          | 1.20E-02     | 3.427       | 2.30E-01     | 1.936       | 2.29E-01       | 1.449       | 9.29E-01       | -1.043      |
| NCBP1   | nuclear cap binding protein subunit 1, 80kDa                        | 3.83E-02     | -2.567      | 2.13E-01     | -2.049      | 6.56E-01       | 1.111       | 5.33E-01       | -1.062      |
| TIA1    | TIA1 cytotoxic granule-associated RNA binding protein               | 2.69E-02     | 1.805       | 1.00E+00     | 1.963       | 9.38E-01       | -1.024      | 6.20E-01       | 1.141       |

**LMP2-noInhs\_Translation of mRNA (P = 1)**

none

**LMP1 with Inhs\_Translation of mRNA (P = 2.59 x 10<sup>-5</sup>)**

| Symbol | Entrez Gene Name                                                   | LMP1 no Inhs |             | LMP2 no Inhs |             | LMP1 with Inhs |             | LMP2 with Inhs |             |
|--------|--------------------------------------------------------------------|--------------|-------------|--------------|-------------|----------------|-------------|----------------|-------------|
|        |                                                                    | p-value      | Fold Change | p-value      | Fold Change | p-value        | Fold Change | p-value        | Fold Change |
| AGO2   | argonaute RISC catalytic component 2                               | 1.00E+00     | 1.578       | 1.00E+00     | 1.28        | 1.64E-02       | -1.539      | 1.37E-01       | -1.335      |
| DARS   | aspartyl-tRNA synthetase                                           | 9.00E-01     | -1.035      | 8.33E-01     | 1.067       | 4.73E-02       | -1.295      | 2.76E-01       | -1.181      |
| EIF2A  | eukaryotic translation initiation factor 2A, 65kDa                 | 9.33E-01     | -1.021      | 3.74E-01     | 1.287       | 2.67E-02       | -1.316      | 5.59E-02       | -1.223      |
| EIF2S1 | eukaryotic translation initiation factor 2, subunit 1 alpha, 35kDa | 1.87E-01     | 1.365       | 7.04E-01     | 1.067       | 2.93E-03       | -1.354      | 7.24E-01       | -1.028      |
| EIF2S3 | eukaryotic translation initiation factor 2, subunit 3 gamma, 52kDa | 5.73E-01     | -1.064      | 7.36E-01     | 1.157       | 3.03E-02       | -1.424      | 3.71E-01       | -1.114      |
| EIF3B  | eukaryotic translation initiation factor 3, subunit B              | 3.42E-01     | -1.386      | 8.48E-01     | 1.074       | 1.02E-02       | -1.676      | 2.12E-03       | -1.435      |
| EIF3C  | eukaryotic translation initiation factor 3, subunit C              | 5.73E-01     | -1.271      | 7.02E-01     | -1.177      | 9.18E-03       | -1.354      | 1.15E-01       | -1.17       |
| EIF3E  | eukaryotic translation initiation factor 3, subunit E              | 2.79E-01     | 1.27        | 5.54E-01     | -1.191      | 4.88E-02       | -1.981      | 2.96E-02       | -1.483      |
| EIF4G3 | eukaryotic translation initiation factor 4 gamma, 3                | 1.00E+00     | -1.319      | 1.00E+00     | 1.355       | 2.49E-02       | 1.703       | 1.09E-01       | -1.517      |
| EIF4H  | eukaryotic translation initiation factor 4H                        | 4.51E-01     | -1.362      | 5.80E-01     | -1.527      | 2.09E-03       | -1.36       | 1.23E-02       | -1.316      |
| EPRS   | glutamyl-prolyl-tRNA synthetase                                    | 8.40E-02     | -1.28       | 4.72E-01     | -1.176      | 3.69E-02       | -1.214      | 6.05E-01       | 1.029       |
| FARSB  | phenylalanyl-tRNA synthetase, beta subunit                         | 1.46E-02     | -1.791      | 5.16E-01     | -1.186      | 3.76E-02       | -1.225      | 8.77E-01       | 1.013       |
| FXR1   | fragile X mental retardation, autosomal homolog 1                  | 5.43E-01     | -1.461      | 8.26E-01     | 1.117       | 1.51E-02       | -1.295      | 8.38E-03       | -1.647      |
| GRB7   | growth factor receptor-bound protein 7                             | 1.00E+00     | 0           | 1.00E+00     | 0           | 3.20E-02       | 1.867       | 1.00E+00       | 1.058       |
| GTF2H3 | general transcription factor IIH, polypeptide 3, 34kDa             |              |             |              |             | 1.85E-02       | -2.117      | 3.93E-01       | -1.393      |
| PABPC4 | poly(A) binding protein, cytoplasmic 4 (inducible form)            | 7.73E-01     | -1.126      | 7.92E-01     | 1.027       | 6.62E-03       | -1.267      | 7.58E-01       | -1.046      |

**LMP2 with Inhs\_Translation of mRNA (P = 0.00016)**

| Symbol   | Entrez Gene Name                                              | LMP1 no Inhs |             | LMP2 no Inhs |             | LMP1 with Inhs |             | LMP2 with Inhs |             |
|----------|---------------------------------------------------------------|--------------|-------------|--------------|-------------|----------------|-------------|----------------|-------------|
|          |                                                               | p-value      | Fold Change | p-value      | Fold Change | p-value        | Fold Change | p-value        | Fold Change |
| DAPK3    | death-associated protein kinase 3                             | 1.00E+00     | 0           | 1.00E+00     | 0           | 2.18E-01       | 1.285       | 4.16E-02       | -1.518      |
| EIF5     | eukaryotic translation initiation factor 5                    | 3.46E-01     | 1.602       | 6.89E-01     | 1.275       | 1.22E-01       | -1.603      | 4.54E-02       | -1.458      |
| EIF3B    | eukaryotic translation initiation factor 3, subunit B         | 3.42E-01     | -1.386      | 8.48E-01     | 1.074       | 1.02E-02       | -1.676      | 2.12E-03       | -1.435      |
| EIF3E    | eukaryotic translation initiation factor 3, subunit E         | 2.79E-01     | 1.27        | 5.54E-01     | -1.191      | 4.88E-02       | -1.981      | 2.96E-02       | -1.483      |
| EIF3K    | eukaryotic translation initiation factor 3, subunit K         | 4.74E-01     | -1.416      | 6.92E-01     | -1.129      | 3.06E-01       | -1.21       | 4.08E-02       | -1.481      |
| EIF4A2   | eukaryotic translation initiation factor 4A2                  | 1.00E+00     | 0           | 1.00E+00     | 0           | 5.80E-01       | 1.224       | 4.97E-02       | -2.874      |
| EIF4EBP2 | eukaryotic translation initiation factor 4E binding protein 2 |              |             |              |             | 2.53E-01       | 1.48        | 2.60E-02       | -4.372      |
| EIF4H    | eukaryotic translation initiation factor 4H                   | 4.51E-01     | -1.362      | 5.80E-01     | -1.527      | 2.09E-03       | -1.36       | 1.23E-02       | -1.316      |
| FMR1     | fragile X mental retardation 1                                | 7.18E-02     | -2.219      | 3.05E-01     | -1.654      | 3.63E-01       | -1.454      | 3.98E-02       | -1.65       |
| FXR1     | fragile X mental retardation, autosomal homolog 1             | 5.43E-01     | -1.461      | 8.26E-01     | 1.117       | 1.51E-02       | -1.295      | 8.38E-03       | -1.647      |
| IGF2BP3  | insulin-like growth factor 2 mRNA binding protein 3           | 7.30E-01     | 1.216       | 3.56E-03     | -1.963      | 5.05E-01       | -1.102      | 1.29E-02       | -2.325      |
| MTIF3    | mitochondrial translational initiation factor 3               |              |             |              |             | 4.09E-01       | 1.248       | 2.99E-02       | 1.596       |

None **LMP1-no Inhibitors: Translation of RNA (P = 1)** LMP1 no Inhs LMP2 no Inhs LMP1 with Inhs LMP2 with Inhs

None **LMP2-no Inhibitors: Translation of RNA (P = 1)** LMP1 no Inhs LMP2 no Inhs LMP1 with Inhs LMP2 with Inhs

None **LMP1-with Inhibitors: Translation of RNA (P = 1)** LMP1 no Inhs LMP2 no Inhs LMP1 with Inhs LMP2 with Inhs

**LMP2-with Inhibitors: Translation of RNA (P = 4.82 x 10<sup>-5</sup>)**

| Symbol   | Entrez Gene Name                                              | LMP1 no Inhs |             | LMP2 no Inhs |             | LMP1 with Inhs |             | LMP2 with Inhs |             |
|----------|---------------------------------------------------------------|--------------|-------------|--------------|-------------|----------------|-------------|----------------|-------------|
|          |                                                               | p-value      | Fold Change | p-value      | Fold Change | p-value        | Fold Change | p-value        | Fold Change |
| DAPK3    | death-associated protein kinase 3                             | 1.00E+00     | 0           | 1.00E+00     | 0           | 2.18E-01       | 1.285       | 4.16E-02       | -1.518      |
| EIF5     | eukaryotic translation initiation factor 5                    | 3.46E-01     | 1.602       | 6.89E-01     | 1.275       | 1.22E-01       | -1.603      | 4.54E-02       | -1.458      |
| EIF3B    | eukaryotic translation initiation factor 3, subunit B         | 3.42E-01     | -1.386      | 8.48E-01     | 1.074       | 1.02E-02       | -1.676      | 2.12E-03       | -1.435      |
| EIF3E    | eukaryotic translation initiation factor 3, subunit E         | 2.79E-01     | 1.27        | 5.54E-01     | -1.191      | 4.88E-02       | -1.981      | 2.96E-02       | -1.483      |
| EIF3K    | eukaryotic translation initiation factor 3, subunit K         | 4.74E-01     | -1.416      | 6.92E-01     | -1.129      | 3.06E-01       | -1.21       | 4.08E-02       | -1.481      |
| EIF4A2   | eukaryotic translation initiation factor 4A2                  | 1.00E+00     | 0           | 1.00E+00     | 0           | 5.80E-01       | 1.224       | 4.97E-02       | -2.874      |
| EIF4EBP2 | eukaryotic translation initiation factor 4E binding protein 2 |              |             |              |             | 2.53E-01       | 1.48        | 2.60E-02       | -4.372      |
| EIF4H    | eukaryotic translation initiation factor 4H                   | 4.51E-01     | -1.362      | 5.80E-01     | -1.527      | 2.09E-03       | -1.36       | 1.23E-02       | -1.316      |
| FMR1     | fragile X mental retardation 1                                | 7.18E-02     | -2.219      | 3.05E-01     | -1.654      | 3.63E-01       | -1.454      | 3.98E-02       | -1.65       |
| FXR1     | fragile X mental retardation, autosomal homolog 1             | 5.43E-01     | -1.461      | 8.26E-01     | 1.117       | 1.51E-02       | -1.295      | 8.38E-03       | -1.647      |
| IGF2BP3  | insulin-like growth factor 2 mRNA binding protein 3           | 7.30E-01     | 1.216       | 3.56E-03     | -1.963      | 5.05E-01       | -1.102      | 1.29E-02       | -2.325      |
| MTIF3    | mitochondrial translational initiation factor 3               |              |             |              |             | 4.09E-01       | 1.248       | 2.99E-02       | 1.596       |
| MTRF1    | mitochondrial translational release factor 1                  | 1.00E+00     | 0           | 1.00E+00     | 0           | 3.14E-01       | 1.37        | 4.93E-02       | -2.68       |

**LMP1-no Inhibitors: Expression of Protein (P = 0.00047)**

| Symbol  | Entrez Gene Name                                                    | LMP1 no Inhs |             | LMP2 no Inhs |             | LMP1 with Inhs |             | LMP2 with Inhs |             |
|---------|---------------------------------------------------------------------|--------------|-------------|--------------|-------------|----------------|-------------|----------------|-------------|
|         |                                                                     | p-value      | Fold Change | p-value      | Fold Change | p-value        | Fold Change | p-value        | Fold Change |
| EIF2AK2 | eukaryotic translation initiation factor 2-alpha kinase 2           | 3.04E-02     | -1.756      | 5.90E-01     | 1.081       | 5.77E-01       | -1.088      | 3.84E-01       | -1.125      |
| EIF2B4  | eukaryotic translation initiation factor 2B, subunit 4 delta, 67kDa | 1.95E-02     | 1.233       | 1.00E+00     | 1.446       | 3.35E-01       | -1.208      | 5.09E-01       | -1.133      |
| EIF3L   | eukaryotic translation initiation factor 3, subunit L               | 7.50E-04     | -1.578      | 3.03E-01     | -1.421      | 1.52E-01       | -1.223      | 1.01E-01       | -1.191      |
| EIF4A1  | eukaryotic translation initiation factor 4A1                        | 2.22E-02     | -1.494      | 6.00E-01     | -1.108      | 5.36E-03       | -1.474      | 2.21E-03       | -1.518      |
| FARSB   | phenylalanyl-tRNA synthetase, beta subunit                          | 1.46E-02     | -1.791      | 5.16E-01     | -1.186      | 3.76E-02       | -1.225      | 8.77E-01       | 1.013       |
| HSPB1   | heat shock 27kDa protein 1                                          | 1.20E-02     | 3.427       | 2.30E-01     | 1.936       | 2.29E-01       | 1.449       | 9.29E-01       | -1.043      |
| MYBBP1A | MYB binding protein (P160) 1a                                       | 1.16E-02     | -1.524      | 5.32E-01     | -1.07       | 3.38E-02       | -1.329      | 5.27E-02       | -1.161      |
| NCBP1   | nuclear cap binding protein subunit 1, 80kDa                        | 3.83E-02     | -2.567      | 2.13E-01     | -2.049      | 6.56E-01       | 1.111       | 5.33E-01       | -1.062      |
| TIA1    | TIA1 cytotoxic granule-associated RNA binding protein               | 2.69E-02     | 1.805       | 1.00E+00     | 1.963       | 9.38E-01       | -1.024      | 6.20E-01       | 1.141       |

**LMP2-no Inhibitors: Expression of Protein (P = 1)**

none

**LMP1-with Inhibitors: Expression of Protein (P = 0.0002)**

| Symbol   | Entrez Gene Name                                                   | LMP1 no Inhs |             | LMP2 no Inhs |             | LMP1 with Inhs |             | LMP2 with Inhs |             |
|----------|--------------------------------------------------------------------|--------------|-------------|--------------|-------------|----------------|-------------|----------------|-------------|
|          |                                                                    | p-value      | Fold Change | p-value      | Fold Change | p-value        | Fold Change | p-value        | Fold Change |
| AGO2     | argonaute RISC catalytic component 2                               | 1.00E+00     | 1.578       | 1.00E+00     | 1.28        | 1.64E-02       | -1.539      | 1.37E-01       | -1.335      |
| ANXA1    | annexin A1                                                         | 1.02E-01     | 1.681       | 1.66E-01     | 1.297       | 1.25E-02       | 1.272       | 7.77E-01       | -1.021      |
| DARS     | aspartyl-tRNA synthetase                                           | 9.00E-01     | -1.035      | 8.33E-01     | 1.067       | 4.73E-02       | -1.295      | 2.76E-01       | -1.181      |
| EIF2A    | eukaryotic translation initiation factor 2A, 65kDa                 | 9.33E-01     | -1.021      | 3.74E-01     | 1.287       | 2.67E-02       | -1.316      | 5.59E-02       | -1.223      |
| EIF2S1   | eukaryotic translation initiation factor 2, subunit 1 alpha, 35kDa | 1.87E-01     | 1.365       | 7.04E-01     | 1.067       | 2.93E-03       | -1.354      | 7.24E-01       | -1.028      |
| EIF2S3   | eukaryotic translation initiation factor 2, subunit 3 gamma, 52kDa | 5.73E-01     | -1.064      | 7.36E-01     | 1.157       | 3.03E-02       | -1.424      | 3.71E-01       | -1.114      |
| EIF3B    | eukaryotic translation initiation factor 3, subunit B              | 3.42E-01     | -1.386      | 8.48E-01     | 1.074       | 1.02E-02       | -1.676      | 2.12E-03       | -1.435      |
| EIF3C    | eukaryotic translation initiation factor 3, subunit C              | 5.73E-01     | -1.271      | 7.02E-01     | -1.177      | 9.18E-03       | -1.354      | 1.15E-01       | -1.17       |
| EIF3E    | eukaryotic translation initiation factor 3, subunit E              | 2.79E-01     | 1.27        | 5.54E-01     | -1.191      | 4.88E-02       | -1.981      | 2.96E-02       | -1.483      |
| EIF4A1   | eukaryotic translation initiation factor 4A1                       | 2.22E-02     | -1.494      | 6.00E-01     | -1.108      | 5.36E-03       | -1.474      | 2.21E-03       | -1.518      |
| EIF4G3   | eukaryotic translation initiation factor 4 gamma, 3                | 1.00E+00     | -1.319      | 1.00E+00     | 1.355       | 2.49E-02       | 1.703       | 1.09E-01       | -1.517      |
| EIF4H    | eukaryotic translation initiation factor 4H                        | 4.51E-01     | -1.362      | 5.80E-01     | -1.527      | 2.09E-03       | -1.36       | 1.23E-02       | -1.316      |
| EPRS     | glutamyl-prolyl-tRNA synthetase                                    | 8.40E-02     | -1.28       | 4.72E-01     | -1.176      | 3.69E-02       | -1.214      | 6.05E-01       | 1.029       |
| FARSB    | phenylalanyl-tRNA synthetase, beta subunit                         | 1.46E-02     | -1.791      | 5.16E-01     | -1.186      | 3.76E-02       | -1.225      | 8.77E-01       | 1.013       |
| FXR1     | fragile X mental retardation, autosomal homolog 1                  | 5.43E-01     | -1.461      | 8.26E-01     | 1.117       | 1.51E-02       | -1.295      | 8.38E-03       | -1.647      |
| GRB7     | growth factor receptor-bound protein 7                             | 1.00E+00     | 0           | 1.00E+00     | 0           | 3.20E-02       | 1.867       | 1.00E+00       | 1.058       |
| GTF2H3   | general transcription factor IIH, polypeptide 3, 34kDa             |              |             |              |             | 1.85E-02       | -2.117      | 3.93E-01       | -1.393      |
| HNRNPK   | heterogeneous nuclear ribonucleoprotein K                          | 6.23E-01     | 1.079       | 6.77E-01     | 1.057       | 1.97E-02       | -1.205      | 3.08E-01       | -2.032      |
| HSPA1A/H | heat shock 70kDa protein 1A                                        | 1.43E-01     | 1.284       | 3.50E-01     | 1.333       | 2.34E-03       | -1.242      | 1.93E-01       | -1.064      |
| MYBBP1A  | MYB binding protein (P160) 1a                                      | 1.16E-02     | -1.524      | 5.32E-01     | -1.07       | 3.38E-02       | -1.329      | 5.27E-02       | -1.161      |
| NCK1     | NCK adaptor protein 1                                              | 1.00E+00     | 1.371       | 1.00E+00     | 1.688       | 3.97E-03       | 1.85        | 3.49E-01       | 1.681       |
| NXF1     | nuclear RNA export factor 1                                        | 3.09E-01     | 2.024       | 6.23E-02     | 1.906       | 1.52E-02       | -1.445      | 1.41E-01       | -1.309      |
| PABPC4   | poly(A) binding protein, cytoplasmic 4 (inducible form)            | 7.73E-01     | -1.126      | 7.92E-01     | 1.027       | 6.62E-03       | -1.267      | 7.58E-01       | -1.046      |
| SOD1     | superoxide dismutase 1, soluble                                    | 4.63E-01     | 2.67        | 7.65E-01     | 1.356       | 1.68E-02       | 2.011       | 6.23E-01       | -1.434      |

**LMP2-with Inhibitors: Expression of Protein (P = 8.29 x 10<sup>-5</sup>)**

| Symbol | Entrez Gene Name                                      | LMP1 no Inhs |             | LMP2 no Inhs |             | LMP1 with Inhs |             | LMP2 with Inhs |             |
|--------|-------------------------------------------------------|--------------|-------------|--------------|-------------|----------------|-------------|----------------|-------------|
|        |                                                       | p-value      | Fold Change | p-value      | Fold Change | p-value        | Fold Change | p-value        | Fold Change |
| BPNT1  | 3'(2'), 5'-bisphosphate nucleotidase 1                | 8.47E-01     | 1.04        | 5.96E-01     | 1.109       | 7.85E-02       | 1.155       | 4.49E-02       | 1.199       |
| DAPK3  | death-associated protein kinase 3                     | 1.00E+00     | 0           | 1.00E+00     | 0           | 2.18E-01       | 1.285       | 4.16E-02       | -1.518      |
| EIF5   | eukaryotic translation initiation factor 5            | 3.46E-01     | 1.602       | 6.89E-01     | 1.275       | 1.22E-01       | -1.603      | 4.54E-02       | -1.458      |
| EIF3B  | eukaryotic translation initiation factor 3, subunit B | 3.42E-01     | -1.386      | 8.48E-01     | 1.074       | 1.02E-02       | -1.676      | 2.12E-03       | -1.435      |
| EIF3E  | eukaryotic translation initiation factor 3, subunit E | 2.79E-01     | 1.27        | 5.54E-01     | -1.191      | 4.88E-02       | -1.981      | 2.96E-02       | -1.483      |



|          |                                                                      |          |        |          |        |          |        |          |        |
|----------|----------------------------------------------------------------------|----------|--------|----------|--------|----------|--------|----------|--------|
| EIF3K    | eukaryotic translation initiation factor 3, subunit K                | 4.74E-01 | -1.416 | 6.92E-01 | -1.129 | 3.06E-01 | -1.21  | 4.08E-02 | -1.481 |
| EIF4A1   | eukaryotic translation initiation factor 4A1                         | 2.22E-02 | -1.494 | 6.00E-01 | -1.108 | 5.36E-03 | -1.474 | 2.21E-03 | -1.518 |
| EIF4A2   | eukaryotic translation initiation factor 4A2                         | 1.00E+00 | 0      | 1.00E+00 | 0      | 5.80E-01 | 1.224  | 4.97E-02 | -2.874 |
| EIF4EBP2 | eukaryotic translation initiation factor 4E binding protein 2        |          |        |          |        | 2.53E-01 | 1.48   | 2.60E-02 | -4.372 |
| EIF4H    | eukaryotic translation initiation factor 4H                          | 4.51E-01 | -1.362 | 5.80E-01 | -1.527 | 2.09E-03 | -1.36  | 1.23E-02 | -1.316 |
| FAS      | Fas cell surface death receptor                                      | 1.00E+00 | -1.102 | 1.00E+00 | 0      | 1.24E-01 | -1.23  | 3.08E-03 | -1.72  |
| FMR1     | fragile X mental retardation 1                                       | 7.18E-02 | -2.219 | 3.05E-01 | -1.654 | 3.63E-01 | -1.454 | 3.98E-02 | -1.65  |
| FXR1     | fragile X mental retardation, autosomal homolog 1                    | 5.43E-01 | -1.461 | 8.26E-01 | 1.117  | 1.51E-02 | -1.295 | 8.38E-03 | -1.647 |
| IGF2BP3  | insulin-like growth factor 2 mRNA binding protein 3                  | 7.30E-01 | 1.216  | 3.56E-03 | -1.963 | 5.05E-01 | -1.102 | 1.29E-02 | -2.325 |
| MTIF3    | mitochondrial translational initiation factor 3                      |          |        |          |        | 4.09E-01 | 1.248  | 2.99E-02 | 1.596  |
| MTRF1    | mitochondrial translational release factor 1                         | 1.00E+00 | 0      | 1.00E+00 | 0      | 3.14E-01 | 1.37   | 4.93E-02 | -2.68  |
| NFKB1    | nuclear factor of kappa light polypeptide gene enhancer in B-cells 1 | 7.54E-01 | -1.28  | 8.35E-01 | 1.177  | 9.42E-02 | 1.205  | 1.63E-02 | 1.226  |
| RHEB     | Ras homolog enriched in brain                                        | 1.00E+00 | 0      | 1.00E+00 | 0      | 4.60E-01 | -1.64  | 3.30E-02 | -1.975 |
| RPS6KB1  | ribosomal protein S6 kinase, 70kDa, polypeptide 1                    | 1.00E+00 | 1.861  | 1.00E+00 | 1.983  | 1.04E-01 | -1.675 | 3.62E-02 | -1.878 |
| STAU1    | staufer double-stranded RNA binding protein 1                        | 2.56E-01 | 1.342  | 4.38E-01 | 1.344  | 4.04E-01 | 1.111  | 3.33E-02 | -1.379 |

| <b>LMP1-no Inhibitors: Expression of DNA (P = 1)</b>        |                                                                | <b>LMP1 no Inhs</b> |             | <b>LMP2 no Inhs</b> |             | <b>LMP1 with Inhs</b> |             | <b>LMP2 with Inhs</b> |             |
|-------------------------------------------------------------|----------------------------------------------------------------|---------------------|-------------|---------------------|-------------|-----------------------|-------------|-----------------------|-------------|
| none                                                        |                                                                |                     |             |                     |             |                       |             |                       |             |
| <b>LMP2-no Inhibitors: Expression of DNA (P = 1)</b>        |                                                                | <b>LMP1 no Inhs</b> |             | <b>LMP2 no Inhs</b> |             | <b>LMP1 with Inhs</b> |             | <b>LMP2 with Inhs</b> |             |
| none                                                        |                                                                |                     |             |                     |             |                       |             |                       |             |
| <b>LMP1-with Inhibitors: Expression of DNA (P = 0.0043)</b> |                                                                | <b>LMP1 no Inhs</b> |             | <b>LMP2 no Inhs</b> |             | <b>LMP1 with Inhs</b> |             | <b>LMP2 with Inhs</b> |             |
| Symbol                                                      | Entrez Gene Name                                               | p-value             | Fold Change | p-value             | Fold Change | p-value               | Fold Change | p-value               | Fold Change |
| AATF                                                        | apoptosis antagonizing transcription factor                    | 3.12E-01            | -1.37       | 4.76E-01            | 1.207       | 3.10E-02              | -1.21       | 4.32E-01              | -1.074      |
| ABT1                                                        | activator of basal transcription 1                             | 1.00E+00            | 0           | 1.00E+00            | 0           | 4.46E-02              | -1.639      | 1.10E-02              | -2.15       |
| ARHGEF11                                                    | Rho guanine nucleotide exchange factor (GEF) 11                | 1.00E+00            | 0           | 1.00E+00            | 0           | 1.83E-02              | 1.612       | 6.07E-01              | -1.132      |
| ATF7                                                        | activating transcription factor 7                              | 1.00E+00            | 0           | 1.00E+00            | 0           | 4.54E-02              | -2.237      | 3.51E-01              | -1.311      |
| ATF7IP                                                      | activating transcription factor 7 interacting protein          | 1.00E+00            | 0           | 1.00E+00            | 0           | 2.41E-02              | 2.025       | 4.06E-01              | -1.148      |
| ATXN7L3                                                     | ataxin 7-like 3                                                |                     |             |                     |             | 5.71E-03              | -1.231      | 4.19E-02              | 1.368       |
| BCLAF1                                                      | BCL2-associated transcription factor 1                         | 2.45E-01            | 1.432       | 8.27E-01            | -1.07       | 1.38E-02              | -1.654      | 8.10E-01              | 1.037       |
| BPTF                                                        | bromodomain PHD finger transcription factor                    | 1.00E+00            | 0           | 1.00E+00            | 0           | 3.55E-02              | -2.04       | 1.83E-01              | -1.528      |
| BRD8                                                        | bromodomain containing 8                                       | 1.00E+00            | -2.574      | 1.00E+00            | 1.393       | 2.52E-02              | 1.56        | 3.21E-01              | 1.296       |
| CBX1                                                        | chromobox homolog 1                                            | 1.00E+00            | -2.276      | 1.00E+00            | 1.612       | 2.66E-02              | -1.502      | 2.12E-01              | -1.267      |
| CD44                                                        | CD44 molecule (Indian blood group)                             | 4.40E-01            | -2.277      | 1.34E-01            | -3.127      | 5.16E-03              | -1.316      | 4.93E-01              | -1.089      |
| CHD1                                                        | chromodomain helicase DNA binding protein 1                    | 1.00E+00            | 0           | 1.00E+00            | 0           | 1.19E-02              | -3.257      | 2.45E-02              | -2.212      |
| CHD2                                                        | chromodomain helicase DNA binding protein 2                    | 1.00E+00            | 1.064       | 1.00E+00            | 0           | 2.19E-02              | -1.743      | 3.30E-01              | -1.109      |
| CNN2                                                        | calponin 2                                                     | 3.14E-02            | 1.55        | 3.23E-01            | 1.388       | 8.13E-04              | 1.753       | 6.26E-02              | 1.246       |
| CRABP2                                                      | cellular retinoic acid binding protein 2                       | 1.00E+00            | 0           | 1.00E+00            | 0           | 2.01E-02              | 10.196      | 5.80E-01              | 1.753       |
| CTBP1                                                       | C-terminal binding protein 1                                   | 5.49E-01            | -1.175      | 5.46E-01            | 1.181       | 3.58E-02              | -1.525      | 2.73E-01              | -1.224      |
| CXXC1                                                       | CXXC finger protein 1                                          | 1.00E+00            | 0           | 1.00E+00            | 0           | 1.74E-02              | 1.379       | 1.37E-01              | 1.277       |
| DDX58                                                       | DEAD (Asp-Glu-Ala-Asp) box polypeptide 58                      |                     |             |                     |             | 2.50E-02              | 4.906       | 9.74E-01              | -1.016      |
| DMAP1                                                       | DNA methyltransferase 1 associated protein 1                   | 1.00E+00            | 0           | 1.00E+00            | 0           | 3.08E-02              | -2.365      | 1.76E-01              | -1.46       |
| ECSIT                                                       | ECSIT signalling integrator                                    | 1.00E+00            | 0           | 1.00E+00            | 0           | 1.41E-02              | -2.365      | 1.77E-02              | -2.634      |
| ELAVL2                                                      | ELAV like neuron-specific RNA binding protein 2                |                     |             |                     |             | 5.31E-03              | -2.148      | 6.25E-01              | -1.118      |
| ENO1                                                        | enolase 1, (alpha)                                             | 3.39E-01            | 1.109       | 1.62E-01            | 1.484       | 6.46E-03              | -2.532      | 8.54E-03              | -2.414      |
| FHOD1                                                       | formin homology 2 domain containing 1                          | 2.01E-01            | -2.55       | 1.00E+00            | -1.756      | 7.70E-03              | -2.15       | 1.38E-02              | -2.1        |
| FUBP3                                                       | far upstream element (FUZE) binding protein 3                  | 8.49E-01            | -1.062      | 6.42E-01            | 1.068       | 1.17E-02              | -1.238      | 1.72E-02              | -1.155      |
| GPX1                                                        | glutathione peroxidase 1                                       | 5.95E-01            | 1.428       | 6.56E-01            | 1.449       | 1.46E-02              | 1.273       | 1.51E-01              | 1.193       |
| GTF2H3                                                      | general transcription factor IIH, polypeptide 3, 34kDa         |                     |             |                     |             | 1.85E-02              | -2.117      | 3.93E-01              | -1.393      |
| GTF2I                                                       | general transcription factor Ili                               | 2.48E-01            | -1.295      | 5.24E-01            | -1.528      | 5.99E-03              | -1.282      | 1.35E-02              | -1.186      |
| HDAC2                                                       | histone deacetylase 2                                          | 1.00E+00            | -3.841      | 1.00E+00            | -1.241      | 4.63E-02              | -1.22       | 4.45E-01              | -1.123      |
| HELZ2                                                       | helicase with zinc finger 2, transcriptional coactivator       |                     |             |                     |             | 6.15E-04              | 2.306       | 4.72E-02              | 1.675       |
| HSPA8                                                       | heat shock 70kDa protein 8                                     | 7.91E-01            | 1.055       | 3.99E-01            | 1.176       | 4.62E-02              | -2.934      | 5.98E-01              | 2.678       |
| IFI16                                                       | interferon, gamma-inducible protein 16                         | 9.19E-01            | -1.03       | 3.01E-01            | -1.441      | 4.97E-02              | 1.281       | 9.11E-01              | 1.012       |
| IL18                                                        | interleukin 18                                                 | 3.74E-01            | -1.508      | 6.32E-01            | -1.222      | 5.63E-03              | 1.981       | 1.43E-03              | 1.372       |
| IL1RN                                                       | interleukin 1 receptor antagonist                              | 1.00E+00            | 0           | 1.00E+00            | 0           | 4.59E-02              | 5.796       | 2.60E-01              | 3.522       |
| IQGAP3                                                      | IQ motif containing GTPase activating protein 3                | 1.00E+00            | 0           | 1.00E+00            | 0           | 8.66E-03              | 2.33        | 3.17E-01              | -1.12       |
| KEAP1                                                       | kelch-like ECH-associated protein 1                            | 1.00E-01            | 1.388       | 1.00E+00            | 0           | 4.76E-02              | 1.31        | 1.49E-01              | -1.211      |
| KLF13                                                       | Kruppel-like factor 13                                         |                     |             |                     |             | 2.56E-02              | -2.008      | 1.00E+00              | -2.097      |
| MAFF                                                        | v-maf avian musculoaponeurotic fibrosarcoma oncogene homolog F | 1.00E+00            | 0           | 1.00E+00            | 0           | 6.53E-04              | 2.808       | 2.29E-01              | 1.384       |
| MED21                                                       | mediator complex subunit 21                                    | 1.00E+00            | 0           | 1.00E+00            | 0           | 1.37E-02              | 1.604       | 3.51E-01              | 1.245       |
| MET                                                         | MET proto-oncogene, receptor tyrosine kinase                   | 1.00E+00            | 0           | 1.00E+00            | 0           | 4.99E-02              | -1.277      | 6.91E-01              | 1.046       |
| MTERF3                                                      | mitochondrial transcription termination factor 3               | 1.00E+00            | 0           | 1.00E+00            | 0           | 1.35E-03              | -4.077      | 1.33E-02              | -6.005      |
| MYBBP1A                                                     | MYB binding protein (P160) 1a                                  | 1.16E-02            | -1.524      | 5.32E-01            | -1.07       | 3.38E-02              | -1.329      | 5.27E-02              | -1.161      |

|         |                                                                             |          |        |          |        |          |        |          |        |
|---------|-----------------------------------------------------------------------------|----------|--------|----------|--------|----------|--------|----------|--------|
| MYO6    | myosin VI                                                                   | 7.07E-01 | 1.104  | 2.96E-01 | -1.384 | 2.53E-02 | 1.468  | 7.71E-02 | -1.689 |
| NCK1    | NCK adaptor protein 1                                                       | 1.00E+00 | 1.371  | 1.00E+00 | 1.688  | 3.97E-03 | 1.85   | 3.49E-01 | 1.681  |
| NOLC1   | nucleolar and coiled-body phosphoprotein 1                                  | 5.80E-01 | 1.785  | 8.25E-01 | 1.283  | 4.09E-06 | -1.731 | 3.65E-02 | -8.09  |
| PARP1   | poly (ADP-ribose) polymerase 1                                              | 2.31E-01 | -1.364 | 4.50E-01 | -1.262 | 2.46E-03 | -1.234 | 3.58E-01 | 1.134  |
| PAWR    | PRKC, apoptosis, WT1, regulator                                             | 1.00E+00 | 1.098  | 1.00E+00 | 0      | 7.64E-04 | 2.685  | 1.95E-01 | 1.444  |
| PHB2    | prohibitin 2                                                                | 6.92E-01 | -1.156 | 4.83E-01 | 1.24   | 3.05E-02 | -1.193 | 3.36E-01 | 1.051  |
| PKD1    | polycystic kidney disease 1 (autosomal dominant)                            |          |        |          |        | 3.21E-02 | 1.598  | 1.83E-02 | 1.797  |
| PPID    | peptidylprolyl isomerase D                                                  | 1.43E-01 | -1.434 | 1.18E-01 | -1.53  | 3.17E-02 | -1.441 | 6.87E-01 | -1.041 |
| PPM1A   | protein phosphatase, Mg2+/Mn2+ dependent, 1A                                | 1.00E+00 | 3.041  | 1.00E+00 | 0      | 1.54E-02 | -1.391 | 3.32E-01 | -1.153 |
| PRMT7   | protein arginine methyltransferase 7                                        | 1.00E+00 | 0      | 1.00E+00 | 0      | 4.76E-02 | 1.493  | 3.99E-02 | 1.951  |
| RBBP7   | retinoblastoma binding protein 7                                            | 9.33E-01 | 1.031  | 7.44E-01 | 1.077  | 1.38E-02 | -3.281 | 6.28E-03 | -6.779 |
| RPS6KA4 | ribosomal protein S6 kinase, 90kDa, polypeptide 4                           | 1.00E+00 | -1.026 | 1.00E+00 | -1.418 | 2.13E-02 | -1.624 | 1.13E-01 | -1.257 |
| SAP18   | Sin3A-associated protein, 18kDa                                             | 3.87E-01 | -1.837 | 1.00E+00 | -1.141 | 1.58E-02 | -1.203 | 2.11E-01 | 1.25   |
| SMARCB1 | SWI/SNF related, matrix associated, actin dependent regulator of chrom      | 1.00E+00 | 0      | 1.00E+00 | 0      | 1.38E-02 | -1.689 | 1.69E-01 | -1.22  |
| STRAP   | serine/threonine kinase receptor associated protein                         | 4.66E-01 | -1.445 | 7.06E-01 | -1.186 | 2.65E-02 | -1.333 | 6.87E-03 | -1.382 |
| TBK1    | TANK-binding kinase 1                                                       | 1.00E+00 | 1.058  | 1.00E+00 | 0      | 4.25E-02 | -1.305 | 3.19E-01 | -1.093 |
| TCEB1   | transcription elongation factor B (SIII), polypeptide 1 (15kDa, elongin C)  | 6.52E-01 | 1.202  | 7.71E-01 | 1.235  | 4.49E-02 | -1.414 | 8.04E-01 | -1.028 |
| TCEB3   | transcription elongation factor B (SIII), polypeptide 3 (110kDa, elongin A) | 8.17E-01 | 1.238  | 1.00E+00 | 1.033  | 1.71E-02 | -2.843 | 5.92E-01 | -1.37  |
| TCF12   | transcription factor 12                                                     |          |        |          |        | 1.43E-02 | -1.871 | 1.00E+00 | -2.456 |
| TLR3    | toll-like receptor 3                                                        |          |        |          |        | 4.57E-02 | -1.3   | 4.35E-02 | -2.468 |
| TRIM27  | tripartite motif containing 27                                              | 1.00E+00 | 0      | 1.00E+00 | 0      | 2.37E-02 | 1.677  | 3.69E-01 | 1.23   |
| TROVE2  | TROVE domain family, member 2                                               | 3.20E-01 | -1.312 | 3.38E-01 | 1.404  | 3.41E-02 | 1.343  | 7.75E-02 | 1.264  |
| UBE2I   | ubiquitin-conjugating enzyme E2I                                            | 1.38E-01 | -1.801 | 8.79E-02 | -1.654 | 1.19E-02 | -1.485 | 6.95E-02 | -1.283 |
| UBE2L3  | ubiquitin-conjugating enzyme E2L 3                                          | 9.58E-01 | -1.053 | 9.55E-01 | -1.079 | 1.42E-02 | 4.031  | 2.62E-01 | 1.81   |
| VIM     | vimentin                                                                    | 9.23E-01 | -1.058 | 7.32E-01 | -1.226 | 9.94E-04 | -1.74  | 2.98E-02 | -1.433 |
| XAB2    | XPA binding protein 2                                                       | 1.00E+00 | 1.029  | 1.00E+00 | 1.851  | 2.07E-02 | -1.513 | 2.66E-01 | -1.533 |
| YBX3    | Y box binding protein 3                                                     | 6.81E-01 | 1.32   | 4.39E-01 | -1.621 | 3.77E-02 | -1.3   | 1.55E-02 | -1.41  |
| ZNF143  | zinc finger protein 143                                                     | 1.00E+00 | 0      | 1.00E+00 | 0      | 1.00E-02 | -1.233 | 4.06E-01 | 1.085  |

|               |                                                        | <b>LMP2-with Inhibitors: Expression of DNA (P = 0.00041)</b> |                    | <b>LMP1 no Inhs</b> |                    | <b>LMP2 no Inhs</b> |                    | <b>LMP1 with Inhs</b> |                    | <b>LMP2 with Inhs</b> |                    |
|---------------|--------------------------------------------------------|--------------------------------------------------------------|--------------------|---------------------|--------------------|---------------------|--------------------|-----------------------|--------------------|-----------------------|--------------------|
| <b>Symbol</b> | <b>Entrez Gene Name</b>                                | <b>p-value</b>                                               | <b>Fold Change</b> | <b>p-value</b>      | <b>Fold Change</b> | <b>p-value</b>      | <b>Fold Change</b> | <b>p-value</b>        | <b>Fold Change</b> | <b>p-value</b>        | <b>Fold Change</b> |
| ABLIM3        | actin binding LIM protein family, member 3             | 1.00E+00                                                     | -1.711             | 1.00E+00            | 0                  | 8.58E-01            | -1.06              | 2.38E-02              | -2.771             |                       |                    |
| ABT1          | activator of basal transcription 1                     | 1.00E+00                                                     | 0                  | 1.00E+00            | 0                  | 4.46E-02            | -1.639             | 1.10E-02              | -2.15              |                       |                    |
| ASCC1         | activating signal cointegrator 1 complex subunit 1     | 1.00E+00                                                     | 0                  | 1.00E+00            | 0                  | 1.38E-01            | -1.522             | 3.15E-02              | -1.873             |                       |                    |
| ATF1          | activating transcription factor 1                      |                                                              |                    |                     |                    | 5.54E-01            | 1.108              | 3.67E-02              | 1.33               |                       |                    |
| ATRX          | alpha thalassemia/mental retardation syndrome X-linked | 1.00E+00                                                     | 1.154              | 1.00E+00            | 0                  | 1.46E-01            | -1.223             | 2.48E-02              | -1.745             |                       |                    |
| ATXN7L3       | ataxin 7-like 3                                        |                                                              |                    |                     |                    | 5.71E-03            | -1.231             | 4.19E-02              | 1.368              |                       |                    |
| CAPN15        | calpain 15                                             | 1.00E+00                                                     | 0                  | 1.00E+00            | 0                  | 9.67E-02            | 2.017              | 2.23E-02              | 2.423              |                       |                    |
| CBX4          | chromobox homolog 4                                    | 1.00E+00                                                     | 0                  | 1.00E+00            | 0                  | 5.50E-01            | -1.056             | 4.31E-02              | 1.425              |                       |                    |
| CDKN1C        | cyclin-dependent kinase inhibitor 1C (p57, Kip2)       | 1.00E+00                                                     | 0                  | 1.00E+00            | 0                  | 2.48E-01            | 1.536              | 4.13E-03              | -1.767             |                       |                    |
| CEBPD         | CCAAT/enhancer binding protein (C/EBP), delta          | 9.02E-02                                                     | -1.547             | 2.94E-01            | -1.458             | 6.40E-01            | 1.213              | 3.42E-02              | 1.828              |                       |                    |
| CHD1          | chromodomain helicase DNA binding protein 1            | 1.00E+00                                                     | 0                  | 1.00E+00            | 0                  | 1.19E-02            | -3.257             | 2.45E-02              | -2.212             |                       |                    |
| CHD3          | chromodomain helicase DNA binding protein 3            | 1.00E+00                                                     | 0                  | 1.00E+00            | 0                  | 9.24E-02            | -1.173             | 8.40E-03              | 1.216              |                       |                    |
| CHD4          | chromodomain helicase DNA binding protein 4            | 7.52E-01                                                     | -1.213             | 7.10E-01            | 1.11               | 9.81E-02            | -1.276             | 4.86E-02              | -1.42              |                       |                    |
| DAB2IP        | DAB2 interacting protein                               | 1.00E+00                                                     | 0                  | 1.00E+00            | 0                  | 1.99E-01            | 1.401              | 3.60E-02              | -1.565             |                       |                    |
| ECSIT         | ECSIT signalling integrator                            | 1.00E+00                                                     | 0                  | 1.00E+00            | 0                  | 1.41E-02            | -2.365             | 1.77E-02              | -2.634             |                       |                    |
| ENO1          | enolase 1, (alpha)                                     | 3.39E-01                                                     | 1.109              | 1.62E-01            | 1.484              | 6.46E-03            | -2.532             | 8.54E-03              | -2.414             |                       |                    |
| ERCC2         | excision repair cross-complementation group 2          | 1.00E+00                                                     | 0                  | 1.00E+00            | 0                  | 9.09E-01            | 1.06               | 4.97E-02              | 1.761              |                       |                    |
| FAS           | Fas cell surface death receptor                        | 1.00E+00                                                     | -1.102             | 1.00E+00            | 0                  | 1.24E-01            | -1.23              | 3.08E-03              | -1.72              |                       |                    |

|          |                                                                            |          |        |          |        |          |        |          |        |
|----------|----------------------------------------------------------------------------|----------|--------|----------|--------|----------|--------|----------|--------|
| FHOD1    | formin homology 2 domain containing 1                                      | 2.01E-01 | -2.55  | 1.00E+00 | -1.756 | 7.70E-03 | -2.15  | 1.38E-02 | -2.1   |
| FUBP3    | far upstream element (FUSE) binding protein 3                              | 8.49E-01 | -1.062 | 6.42E-01 | 1.068  | 1.17E-02 | -1.238 | 1.72E-02 | -1.155 |
| GTF2I    | general transcription factor III                                           | 2.48E-01 | -1.295 | 5.24E-01 | -1.528 | 5.99E-03 | -1.282 | 1.35E-02 | -1.186 |
| GTF3C1   | general transcription factor IIIC, polypeptide 1, alpha 220kDa             | 1.00E+00 | -2.402 | 1.00E+00 | -1.807 | 1.83E-01 | -1.864 | 4.22E-02 | -2.687 |
| GTF3C2   | general transcription factor IIIC, polypeptide 2, beta 110kDa              | 1.00E+00 | -1.152 | 1.00E+00 | 1.455  | 7.51E-02 | -1.646 | 1.13E-02 | -1.855 |
| HELZ2    | helicase with zinc finger 2, transcriptional coactivator                   |          |        |          |        | 6.15E-04 | 2.306  | 4.72E-02 | 1.675  |
| IGBP1    | immunoglobulin (CD79A) binding protein 1                                   | 8.70E-01 | -1.056 | 1.00E+00 | -1.076 | 2.00E-01 | -1.267 | 7.97E-03 | -1.947 |
| IL18     | interleukin 18                                                             | 3.74E-01 | -1.508 | 6.32E-01 | -1.222 | 5.63E-03 | 1.981  | 1.43E-03 | 1.372  |
| IRF2BP1  | interferon regulatory factor 2 binding protein 1                           | 7.55E-01 | -1.075 | 1.00E+00 | 0      | 2.06E-01 | -1.286 | 4.85E-02 | -2.121 |
| KANK2    | KN motif and ankyrin repeat domains 2                                      | 1.00E+00 | 0      | 1.00E+00 | 0      | 8.80E-02 | -1.928 | 6.18E-03 | -2.708 |
| KCTD1    | potassium channel tetramerization domain containing 1                      | 1.00E+00 | 0      | 1.00E+00 | 0      | 5.53E-02 | 1.501  | 4.47E-02 | 1.634  |
| MBD1     | methyl-CpG binding domain protein 1                                        | 1.00E+00 | 0      | 1.00E+00 | 0      | 3.34E-01 | -1.117 | 2.46E-03 | -1.734 |
| MCM7     | minichromosome maintenance complex component 7                             | 2.36E-01 | -1.658 | 1.82E-01 | -1.311 | 1.73E-01 | -1.253 | 4.74E-02 | -1.355 |
| MMS19    | MMS19 nucleotide excision repair homolog (S. cerevisiae)                   | 1.00E+00 | 0      | 1.00E+00 | 0      | 4.19E-01 | 1.154  | 1.89E-02 | 1.478  |
| MTERF3   | mitochondrial transcription termination factor 3                           | 1.00E+00 | 0      | 1.00E+00 | 0      | 1.35E-03 | -4.077 | 1.33E-02 | -6.005 |
| MYCBP    | MYC binding protein                                                        | 1.00E+00 | -1.266 | 1.00E+00 | -1.433 | 1.96E-01 | 1.464  | 4.50E-02 | -1.363 |
| NFKB1    | nuclear factor of kappa light polypeptide gene enhancer in B-cells 1       | 7.54E-01 | -1.28  | 8.35E-01 | 1.177  | 9.42E-02 | 1.205  | 1.63E-02 | 1.226  |
| NKAP     | NFKB activating protein                                                    | 1.00E+00 | 0      | 1.00E+00 | 0      | 5.51E-01 | 1.185  | 3.79E-02 | 1.518  |
| NOLC1    | nucleolar and coiled-body phosphoprotein 1                                 | 5.80E-01 | 1.785  | 8.25E-01 | 1.283  | 4.09E-06 | -1.731 | 3.65E-02 | -8.09  |
| PIAS3    | protein inhibitor of activated STAT, 3                                     |          |        |          |        | 9.02E-02 | 4.761  | 1.35E-02 | 6.194  |
| PKD1     | polycystic kidney disease 1 (autosomal dominant)                           |          |        |          |        | 3.21E-02 | 1.598  | 1.83E-02 | 1.797  |
| PML      | promyelocytic leukemia                                                     | 4.01E-01 | -1.174 | 2.33E-02 | -2.367 | 7.11E-01 | 1.114  | 4.66E-02 | -1.449 |
| PPP1R13L | protein phosphatase 1, regulatory subunit 13 like                          | 4.18E-01 | 1.766  | 3.18E-01 | -1.383 | 3.89E-01 | 1.17   | 4.07E-02 | -1.352 |
| PRMT7    | protein arginine methyltransferase 7                                       | 1.00E+00 | 0      | 1.00E+00 | 0      | 4.76E-02 | 1.493  | 3.99E-02 | 1.951  |
| PSIP1    | PC4 and SFRS1 interacting protein 1                                        | 4.98E-01 | -1.186 | 1.00E+00 | 1.241  | 1.30E-01 | -1.136 | 4.78E-03 | -1.159 |
| RBBP7    | retinoblastoma binding protein 7                                           | 9.33E-01 | 1.031  | 7.44E-01 | 1.077  | 1.38E-02 | -3.281 | 6.28E-03 | -6.779 |
| RIPK1    | receptor (TNFRSF)-interacting serine-threonine kinase 1                    | 1.00E+00 | 0      | 1.00E+00 | 0      | 3.61E-01 | 1.444  | 3.39E-03 | -1.61  |
| SIX4     | SIX homeobox 4                                                             | 1.00E+00 | 0      | 1.00E+00 | 0      | 5.98E-02 | 1.77   | 4.28E-02 | 2.119  |
| SMAD2    | SMAD family member 2                                                       | 9.07E-01 | -1.022 | 1.00E+00 | -1.036 | 3.94E-01 | 1.118  | 3.74E-02 | -1.304 |
| STRAP    | serine/threonine kinase receptor associated protein                        | 4.66E-01 | -1.445 | 7.06E-01 | -1.186 | 2.65E-02 | -1.333 | 6.87E-03 | -1.382 |
| TAF4     | TAF4 RNA polymerase II, TATA box binding protein (TBP)-associated factor 4 | 1.00E+00 | 0      | 1.00E+00 | 0      | 8.06E-01 | -1.053 | 4.00E-02 | -1.449 |
| TAF9     | TAF9 RNA polymerase II, TATA box binding protein (TBP)-associated factor 9 |          |        | 1.00E+00 | 1.159  | 6.24E-01 | -1.18  | 4.79E-03 | -1.507 |
| TLR3     | toll-like receptor 3                                                       |          |        |          |        | 4.57E-02 | -1.3   | 4.35E-02 | -2.468 |
| TRAF6    | TNF receptor-associated factor 6, E3 ubiquitin protein ligase              | 1.00E+00 | 0      | 1.00E+00 | 0      | 1.29E-01 | -1.539 | 5.71E-03 | -1.943 |
| TSC22D1  | TSC22 domain family, member 1                                              | 1.00E+00 | 0      | 1.00E+00 | 0      | 1.00E+00 | -3.302 | 2.90E-02 | -3.96  |
| VEZF1    | vascular endothelial zinc finger 1                                         |          |        |          |        | 6.06E-02 | -2.015 | 7.20E-03 | -1.926 |
| VIM      | vimentin                                                                   | 9.23E-01 | -1.058 | 7.32E-01 | -1.226 | 9.94E-04 | -1.74  | 2.98E-02 | -1.433 |
| YBX3     | Y box binding protein 3                                                    | 6.81E-01 | 1.32   | 4.39E-01 | -1.621 | 3.77E-02 | -1.3   | 1.55E-02 | -1.41  |
| ZNF593   | zinc finger protein 593                                                    | 1.00E+00 | 0      | 1.00E+00 | 0      | 2.07E-01 | -1.615 | 8.80E-03 | -1.441 |

|          |                                                                             | LMP1 no Inhs |             | LMP2 no Inhs |             | LMP1 with Inhs |             | LMP2 with Inhs |             |
|----------|-----------------------------------------------------------------------------|--------------|-------------|--------------|-------------|----------------|-------------|----------------|-------------|
| none     | <b>LMP1 no Inhibitors: Transcription of RNA (P = 1)</b>                     |              |             |              |             |                |             |                |             |
| none     | <b>LMP2 no Inhibitors: Transcription of RNA (P = 1)</b>                     |              |             |              |             |                |             |                |             |
|          | <b>LMP1 with Inhibitors: Transcription of RNA (P = 0.0031)</b>              | LMP1 no Inhs |             | LMP2 no Inhs |             | LMP1 with Inhs |             | LMP2 with Inhs |             |
| Symbol   | Entrez Gene Name                                                            | p-value      | Fold Change | p-value      | Fold Change | p-value        | Fold Change | p-value        | Fold Change |
| AATF     | apoptosis antagonizing transcription factor                                 | 3.12E-01     | -1.37       | 4.76E-01     | 1.207       | 3.10E-02       | -1.21       | 4.32E-01       | -1.074      |
| ABT1     | activator of basal transcription 1                                          | 1.00E+00     | 0           | 1.00E+00     | 0           | 4.46E-02       | -1.639      | 1.10E-02       | -2.15       |
| ACTR1B   | ARP1 actin-related protein 1 homolog B, centractin beta (yeast)             | 9.35E-01     | -1.051      | 1.00E+00     | 1.386       | 2.25E-02       | 1.414       | 7.61E-01       | 1.077       |
| ARHGEF11 | Rho guanine nucleotide exchange factor (GEF) 11                             | 1.00E+00     | 0           | 1.00E+00     | 0           | 1.83E-02       | 1.612       | 6.07E-01       | -1.132      |
| ATF7     | activating transcription factor 7                                           | 1.00E+00     | 0           | 1.00E+00     | 0           | 4.54E-02       | -2.237      | 3.51E-01       | -1.311      |
| ATF7IP   | activating transcription factor 7 interacting protein                       | 1.00E+00     | 0           | 1.00E+00     | 0           | 2.41E-02       | 2.025       | 4.06E-01       | -1.148      |
| ATP2C1   | ATPase, Ca++ transporting, type 2C, member 1                                | 1.00E+00     | 0           | 1.00E+00     | 0           | 4.62E-02       | 2.343       | 6.24E-01       | 1.139       |
| ATXN7L3  | ataxin 7-like 3                                                             |              |             |              |             | 5.71E-03       | -1.231      | 4.19E-02       | 1.368       |
| BAG1     | BCL2-associated athanogene                                                  | 1.00E+00     | 0           | 1.00E+00     | 0           | 2.96E-03       | 2.613       | 9.49E-01       | 1.028       |
| BCLAF1   | BCL2-associated transcription factor 1                                      | 2.45E-01     | 1.432       | 8.27E-01     | -1.07       | 1.38E-02       | -1.654      | 8.10E-01       | 1.037       |
| BPTF     | bromodomain PHD finger transcription factor                                 | 1.00E+00     | 0           | 1.00E+00     | 0           | 3.55E-02       | -2.04       | 1.83E-01       | -1.528      |
| BRD8     | bromodomain containing 8                                                    | 1.00E+00     | -2.574      | 1.00E+00     | 1.393       | 2.52E-02       | 1.56        | 3.21E-01       | 1.296       |
| CASP1    | caspase 1, apoptosis-related cysteine peptidase                             | 1.00E+00     | 1.079       | 1.57E-01     | -1.776      | 3.91E-02       | 1.376       | 4.70E-01       | -1.299      |
| CBX1     | chromobox homolog 1                                                         | 1.00E+00     | -2.276      | 1.00E+00     | 1.612       | 2.66E-02       | -1.502      | 2.12E-01       | -1.267      |
| CCNT1    | cyclin T1                                                                   | 1.00E+00     | 0           | 1.00E+00     | 0           | 3.29E-02       | -2.021      | 2.75E-01       | -1.373      |
| CD44     | CD44 molecule (Indian blood group)                                          | 4.40E-01     | -2.277      | 1.34E-01     | -3.127      | 5.16E-03       | -1.316      | 4.93E-01       | -1.089      |
| CHD1     | chromodomain helicase DNA binding protein 1                                 | 1.00E+00     | 0           | 1.00E+00     | 0           | 1.19E-02       | -3.257      | 2.45E-02       | -2.212      |
| CHD2     | chromodomain helicase DNA binding protein 2                                 | 1.00E+00     | 1.064       | 1.00E+00     | 0           | 2.19E-02       | -1.743      | 3.30E-01       | -1.109      |
| CRABP2   | cellular retinoic acid binding protein 2                                    | 1.00E+00     | 0           | 1.00E+00     | 0           | 2.01E-02       | 10.196      | 5.80E-01       | 1.753       |
| CTBP1    | C-terminal binding protein 1                                                | 5.49E-01     | -1.175      | 5.46E-01     | 1.181       | 3.58E-02       | -1.525      | 2.73E-01       | -1.224      |
| CXXC1    | CXXC finger protein 1                                                       | 1.00E+00     | 0           | 1.00E+00     | 0           | 1.74E-02       | 1.379       | 1.37E-01       | 1.277       |
| DDX58    | DEAD (Asp-Glu-Ala-Asp) box polypeptide 58                                   |              |             |              |             | 2.50E-02       | 4.906       | 9.74E-01       | -1.016      |
| DMAP1    | DNA methyltransferase 1 associated protein 1                                | 1.00E+00     | 0           | 1.00E+00     | 0           | 3.08E-02       | -2.365      | 1.76E-01       | -1.46       |
| ECSIT    | ECSIT signalling integrator                                                 | 1.00E+00     | 0           | 1.00E+00     | 0           | 1.41E-02       | -2.365      | 1.77E-02       | -2.634      |
| EIF2S1   | eukaryotic translation initiation factor 2, subunit 1 alpha, 35kDa          | 1.87E-01     | 1.365       | 7.04E-01     | 1.067       | 2.93E-03       | -1.354      | 7.24E-01       | -1.028      |
| ELAVL2   | ELAV like neuron-specific RNA binding protein 2                             |              |             |              |             | 5.31E-03       | -2.148      | 6.25E-01       | -1.118      |
| ENO1     | enolase 1, (alpha)                                                          | 3.39E-01     | 1.109       | 1.62E-01     | 1.484       | 6.46E-03       | -2.532      | 8.54E-03       | -2.414      |
| FHOD1    | formin homology 2 domain containing 1                                       | 2.01E-01     | -2.55       | 1.00E+00     | -1.756      | 7.70E-03       | -2.15       | 1.38E-02       | -2.1        |
| FUBP3    | far upstream element (FUSE) binding protein 3                               | 8.49E-01     | -1.062      | 6.42E-01     | 1.068       | 1.17E-02       | -1.238      | 1.72E-02       | -1.155      |
| GBP2     | guanylate binding protein 2, interferon-inducible                           | 1.00E+00     | 0           | 1.00E+00     | 0           | 1.36E-02       | 2.228       | 1.29E-01       | -1.931      |
| GRN      | granulin                                                                    |              |             |              |             | 7.46E-04       | 1.284       | 2.37E-01       | 1.124       |
| GTF2H3   | general transcription factor IIH, polypeptide 3, 34kDa                      |              |             |              |             | 1.85E-02       | -2.117      | 3.93E-01       | -1.393      |
| GTF2I    | general transcription factor Iii                                            | 2.48E-01     | -1.295      | 5.24E-01     | -1.528      | 5.99E-03       | -1.282      | 1.35E-02       | -1.186      |
| H1FO     | H1 histone family, member 0                                                 | 1.00E+00     | 0           | 1.00E+00     | 0           | 4.62E-04       | 3.114       | 5.34E-01       | 1.213       |
| HDAC2    | histone deacetylase 2                                                       | 1.00E+00     | -3.841      | 1.00E+00     | -1.241      | 4.63E-02       | -1.22       | 4.45E-01       | -1.123      |
| HELZ2    | helicase with zinc finger 2, transcriptional coactivator                    |              |             |              |             | 6.15E-04       | 2.306       | 4.72E-02       | 1.675       |
| HSPA8    | heat shock 70kDa protein 8                                                  | 7.91E-01     | 1.055       | 3.99E-01     | 1.176       | 4.62E-02       | -2.934      | 5.98E-01       | 2.678       |
| IFI16    | interferon, gamma-inducible protein 16                                      | 9.19E-01     | -1.03       | 3.01E-01     | -1.441      | 4.97E-02       | 1.281       | 9.11E-01       | 1.012       |
| IKBKG    | inhibitor of kappa light polypeptide gene enhancer in B-cells, kinase gamma | 1.00E+00     | 1.673       | 1.00E+00     | 1.769       | 5.03E-03       | 1.742       | 2.19E-01       | 1.327       |
| IL18     | interleukin 18                                                              | 3.74E-01     | -1.508      | 6.32E-01     | -1.222      | 5.63E-03       | 1.981       | 1.43E-03       | 1.372       |
| KEAP1    | kelch-like ECH-associated protein 1                                         | 1.00E-01     | 1.388       | 1.00E+00     | 0           | 4.76E-02       | 1.31        | 1.49E-01       | -1.211      |

|         |                                                                                   |          |        |          |        |          |        |          |        |
|---------|-----------------------------------------------------------------------------------|----------|--------|----------|--------|----------|--------|----------|--------|
| KLF13   | Kruppel-like factor 13                                                            |          |        |          |        | 2.56E-02 | -2.008 | 1.00E+00 | -2.097 |
| MAFF    | v-maf avian musculoaponeurotic fibrosarcoma oncogene homolog F                    | 1.00E+00 | 0      | 1.00E+00 | 0      | 6.53E-04 | 2.808  | 2.29E-01 | 1.384  |
| MED21   | mediator complex subunit 21                                                       | 1.00E+00 | 0      | 1.00E+00 | 0      | 1.37E-02 | 1.604  | 3.51E-01 | 1.245  |
| MET     | MET proto-oncogene, receptor tyrosine kinase                                      | 1.00E+00 | 0      | 1.00E+00 | 0      | 4.99E-02 | -1.277 | 6.91E-01 | 1.046  |
| MTERF3  | mitochondrial transcription termination factor 3                                  | 1.00E+00 | 0      | 1.00E+00 | 0      | 1.35E-03 | -4.077 | 1.33E-02 | -6.005 |
| MYBBP1A | MYB binding protein (P160) 1a                                                     | 1.16E-02 | -1.524 | 5.32E-01 | -1.07  | 3.38E-02 | -1.329 | 5.27E-02 | -1.161 |
| MYO6    | myosin VI                                                                         | 7.07E-01 | 1.104  | 2.96E-01 | -1.384 | 2.53E-02 | 1.468  | 7.71E-02 | -1.689 |
| NCK1    | NCK adaptor protein 1                                                             | 1.00E+00 | 1.371  | 1.00E+00 | 1.688  | 3.97E-03 | 1.85   | 3.49E-01 | 1.681  |
| NOLC1   | nucleolar and coiled-body phosphoprotein 1                                        | 5.80E-01 | 1.785  | 8.25E-01 | 1.283  | 4.09E-06 | -1.731 | 3.65E-02 | -8.09  |
| PARP1   | poly (ADP-ribose) polymerase 1                                                    | 2.31E-01 | -1.364 | 4.50E-01 | -1.262 | 2.46E-03 | -1.234 | 3.58E-01 | 1.134  |
| PAWR    | PRKC, apoptosis, WT1, regulator                                                   | 1.00E+00 | 1.098  | 1.00E+00 | 0      | 7.64E-04 | 2.685  | 1.95E-01 | 1.444  |
| PHB2    | prohibitin 2                                                                      | 6.92E-01 | -1.156 | 4.83E-01 | 1.24   | 3.05E-02 | -1.193 | 3.36E-01 | 1.051  |
| PHGDH   | phosphoglycerate dehydrogenase                                                    | 6.87E-01 | -1.119 | 3.93E-01 | 1.376  | 1.42E-02 | -1.542 | 6.59E-04 | 1.472  |
| PKD1    | polycystic kidney disease 1 (autosomal dominant)                                  |          |        |          |        | 3.21E-02 | 1.598  | 1.83E-02 | 1.797  |
| PPID    | peptidylprolyl isomerase D                                                        | 1.43E-01 | -1.434 | 1.18E-01 | -1.53  | 3.17E-02 | -1.441 | 6.87E-01 | -1.041 |
| PPM1A   | protein phosphatase, Mg2+/Mn2+ dependent, 1A                                      | 1.00E+00 | 3.041  | 1.00E+00 | 0      | 1.54E-02 | -1.391 | 3.32E-01 | -1.153 |
| PPP1CC  | protein phosphatase 1, catalytic subunit, gamma isozyme                           | 1.00E+00 | 0      | 1.00E+00 | -3.795 | 3.37E-02 | 1.428  | 2.43E-03 | 1.45   |
| PSMB10  | proteasome (prosome, macropain) subunit, beta type, 10                            | 1.00E+00 | 0      | 1.00E+00 | 0      | 1.03E-02 | 2.319  | 1.00E+00 | -1.566 |
| PSMD14  | proteasome (prosome, macropain) 26S subunit, non-ATPase, 14                       | 8.70E-01 | -1.028 | 9.65E-01 | 1.043  | 4.95E-02 | -1.39  | 4.85E-01 | -1.234 |
| RB1CC1  | RB1-inducible coiled-coil 1                                                       | 1.00E+00 | 0      | 1.00E+00 | 0      | 3.58E-02 | 1.808  | 5.38E-02 | 1.256  |
| RBBP7   | retinoblastoma binding protein 7                                                  | 9.33E-01 | 1.031  | 7.44E-01 | 1.077  | 1.38E-02 | -3.281 | 6.28E-03 | -6.779 |
| RBX1    | ring-box 1, E3 ubiquitin protein ligase                                           | 1.00E+00 | 0      | 1.00E+00 | 0      | 2.30E-02 | -1.494 | 7.36E-01 | -1.081 |
| RPS6KA4 | ribosomal protein S6 kinase, 90kDa, polypeptide 4                                 | 1.00E+00 | -1.026 | 1.00E+00 | -1.418 | 2.13E-02 | -1.624 | 1.13E-01 | -1.257 |
| SAP18   | Sin3A-associated protein, 18kDa                                                   | 3.87E-01 | -1.837 | 1.00E+00 | -1.141 | 1.58E-02 | -1.203 | 2.11E-01 | 1.25   |
| SMARCB1 | SWI/SNF related, matrix associated, actin dependent regulator of chromatin, subfa | 1.00E+00 | 0      | 1.00E+00 | 0      | 1.38E-02 | -1.689 | 1.69E-01 | -1.22  |
| STRAP   | serine/threonine kinase receptor associated protein                               | 4.66E-01 | -1.445 | 7.06E-01 | -1.186 | 2.65E-02 | -1.333 | 6.87E-03 | -1.382 |
| TBK1    | TANK-binding kinase 1                                                             | 1.00E+00 | 1.058  | 1.00E+00 | 0      | 4.25E-02 | -1.305 | 3.19E-01 | -1.093 |
| TCEB1   | transcription elongation factor B (SIII), polypeptide 1 (15kDa, elongin C)        | 6.52E-01 | 1.202  | 7.71E-01 | 1.235  | 4.49E-02 | -1.414 | 8.04E-01 | -1.028 |
| TCEB3   | transcription elongation factor B (SIII), polypeptide 3 (110kDa, elongin A)       | 8.17E-01 | 1.238  | 1.00E+00 | 1.033  | 1.71E-02 | -2.843 | 5.92E-01 | -1.37  |
| TCF12   | transcription factor 12                                                           |          |        |          |        | 1.43E-02 | -1.871 | 1.00E+00 | -2.456 |
| TFG     | TRK-fused gene                                                                    | 3.41E-01 | -1.314 | 1.00E+00 | -1.723 | 5.74E-03 | 2.478  | 1.40E-01 | 1.537  |
| TIMP1   | TIMP metalloproteinase inhibitor 1                                                | 8.12E-01 | 1.079  | 1.00E+00 | -1.174 | 1.98E-02 | 1.741  | 9.21E-01 | 1.008  |
| TIMP3   | TIMP metalloproteinase inhibitor 3                                                | 1.00E+00 | -2.697 | 1.00E+00 | 0      | 4.13E-03 | -1.852 | 4.38E-01 | -1.628 |
| TLR3    | toll-like receptor 3                                                              |          |        |          |        | 4.57E-02 | -1.3   | 4.35E-02 | -2.468 |
| TOM1L1  | target of myb1 (chicken)-like 1                                                   | 1.00E+00 | 2.504  | 1.00E+00 | 0      | 2.89E-02 | -1.651 | 7.87E-02 | -1.487 |
| TRIM27  | tripartite motif containing 27                                                    | 1.00E+00 | 0      | 1.00E+00 | 0      | 2.37E-02 | 1.677  | 3.69E-01 | 1.23   |
| TROVE2  | TROVE domain family, member 2                                                     | 3.20E-01 | -1.312 | 3.38E-01 | 1.404  | 3.41E-02 | 1.343  | 7.75E-02 | 1.264  |
| TUBG1   | tubulin, gamma 1                                                                  | 9.19E-01 | -1.036 | 8.47E-01 | 1.068  | 4.40E-02 | -1.277 | 5.92E-02 | -1.25  |
| UBE2I   | ubiquitin-conjugating enzyme E2I                                                  | 1.38E-01 | -1.801 | 8.79E-02 | -1.654 | 1.19E-02 | -1.485 | 6.95E-02 | -1.283 |
| UBE2L3  | ubiquitin-conjugating enzyme E2L 3                                                | 9.58E-01 | -1.053 | 9.55E-01 | -1.079 | 1.42E-02 | 4.031  | 2.62E-01 | 1.81   |
| XAB2    | XPA binding protein 2                                                             | 1.00E+00 | 1.029  | 1.00E+00 | 1.851  | 2.07E-02 | -1.513 | 2.66E-01 | -1.533 |
| YBX3    | Y box binding protein 3                                                           | 6.81E-01 | 1.32   | 4.39E-01 | -1.621 | 3.77E-02 | -1.3   | 1.55E-02 | -1.41  |
| ZNF143  | zinc finger protein 143                                                           | 1.00E+00 | 0      | 1.00E+00 | 0      | 1.00E-02 | -1.233 | 4.06E-01 | 1.085  |

|               | <b>LMP2 with Inhibitors: Transcription of RNA (P = 0.00055)</b> | <b>LMP1 no Inhs</b> | <b>LMP2 no Inhs</b> | <b>LMP1 with Inhs</b> | <b>LMP2 with Inhs</b> |
|---------------|-----------------------------------------------------------------|---------------------|---------------------|-----------------------|-----------------------|
| <b>Symbol</b> | <b>Entrez Gene Name</b>                                         | <b>p-value</b>      | <b>Fold Change</b>  | <b>p-value</b>        | <b>Fold Change</b>    |
| ABLIM3        | actin binding LIM protein family, member 3                      | 1.00E+00            | -1.711              | 1.00E+00              | 0                     |
| ABT1          | activator of basal transcription 1                              | 1.00E+00            | 0                   | 1.00E+00              | 0                     |
| ACTR2         | ARP2 actin-related protein 2 homolog (yeast)                    | 3.55E-01            | 1.594               | 9.05E-01              | -1.028                |

|           |                                                                                      |          |        |          |        |          |        |          |        |
|-----------|--------------------------------------------------------------------------------------|----------|--------|----------|--------|----------|--------|----------|--------|
| ASCC1     | activating signal cointegrator 1 complex subunit 1                                   | 1.00E+00 | 0      | 1.00E+00 | 0      | 1.38E-01 | -1.522 | 3.15E-02 | -1.873 |
| ATF1      | activating transcription factor 1                                                    |          |        |          |        | 5.54E-01 | 1.108  | 3.67E-02 | 1.33   |
| ATRX      | alpha thalassemia/mental retardation syndrome X-linked                               | 1.00E+00 | 1.154  | 1.00E+00 | 0      | 1.46E-01 | -1.223 | 2.48E-02 | -1.745 |
| ATXN7L3   | ataxin 7-like 3                                                                      |          |        |          |        | 5.71E-03 | -1.231 | 4.19E-02 | 1.368  |
| BAZ2A     | bromodomain adjacent to zinc finger domain, 2A                                       |          |        |          |        | 4.48E-01 | 1.266  | 2.16E-02 | -1.528 |
| CAPN15    | calpain 15                                                                           | 1.00E+00 | 0      | 1.00E+00 | 0      | 9.67E-02 | 2.017  | 2.23E-02 | 2.423  |
| CBX4      | chromobox homolog 4                                                                  | 1.00E+00 | 0      | 1.00E+00 | 0      | 5.50E-01 | -1.056 | 4.31E-02 | 1.425  |
| CDKN1C    | cyclin-dependent kinase inhibitor 1C (p57, Kip2)                                     | 1.00E+00 | 0      | 1.00E+00 | 0      | 2.48E-01 | 1.536  | 4.13E-02 | -1.767 |
| CEBPD     | CCAAT/enhancer binding protein (C/EBP), delta                                        | 9.02E-02 | -1.547 | 2.94E-01 | -1.458 | 6.40E-01 | 1.213  | 3.42E-02 | 1.828  |
| CHD1      | chromodomain helicase DNA binding protein 1                                          | 1.00E+00 | 0      | 1.00E+00 | 0      | 1.19E-02 | -3.257 | 2.45E-02 | -2.212 |
| CHD3      | chromodomain helicase DNA binding protein 3                                          | 1.00E+00 | 0      | 1.00E+00 | 0      | 9.24E-02 | -1.173 | 8.40E-03 | 1.216  |
| CHD4      | chromodomain helicase DNA binding protein 4                                          | 7.52E-01 | -1.213 | 7.10E-01 | 1.11   | 9.81E-02 | -1.276 | 4.86E-02 | -1.42  |
| DAB2IP    | DAB2 interacting protein                                                             | 1.00E+00 | 0      | 1.00E+00 | 0      | 1.99E-01 | 1.401  | 3.60E-02 | -1.565 |
| DYRK1A    | dual-specificity tyrosine-(Y)-phosphorylation regulated kinase 1A                    |          |        |          |        | 7.80E-02 | -1.271 | 3.54E-02 | -1.395 |
| ECSIT     | ECSIT signalling integrator                                                          | 1.00E+00 | 0      | 1.00E+00 | 0      | 1.41E-02 | -2.365 | 1.77E-02 | -2.634 |
| EEF1D     | eukaryotic translation elongation factor 1 delta (guanine nucleotide exchange protei | 6.47E-01 | 1.485  | 5.90E-01 | 1.601  | 1.17E-01 | -1.375 | 8.67E-03 | 3.326  |
| ENO1      | enolase 1, (alpha)                                                                   | 3.39E-01 | 1.109  | 1.62E-01 | 1.484  | 6.46E-03 | -2.532 | 8.54E-03 | -2.414 |
| ERCC2     | excision repair cross-complementation group 2                                        | 1.00E+00 | 0      | 1.00E+00 | 0      | 9.09E-01 | 1.06   | 4.97E-02 | 1.761  |
| FHOD1     | formin homology 2 domain containing 1                                                | 2.01E-01 | -2.55  | 1.00E+00 | -1.756 | 7.70E-03 | -2.15  | 1.38E-02 | -2.1   |
| FUBP3     | far upstream element (FUSE) binding protein 3                                        | 8.49E-01 | -1.062 | 6.42E-01 | 1.068  | 1.17E-02 | -1.238 | 1.72E-02 | -1.155 |
| GTF2I     | general transcription factor Iii                                                     | 2.48E-01 | -1.295 | 5.24E-01 | -1.528 | 5.99E-03 | -1.282 | 1.35E-02 | -1.186 |
| GTF3C1    | general transcription factor IIIC, polypeptide 1, alpha 220kDa                       | 1.00E+00 | -2.402 | 1.00E+00 | -1.807 | 1.83E-01 | -1.864 | 4.22E-02 | -2.687 |
| GTF3C2    | general transcription factor IIIC, polypeptide 2, beta 110kDa                        | 1.00E+00 | -1.152 | 1.00E+00 | 1.455  | 7.51E-02 | -1.646 | 1.13E-02 | -1.855 |
| H2AFX     | H2A histone family, member X                                                         | 8.16E-01 | -1.078 | 9.95E-01 | 1.009  | 8.35E-01 | 1.046  | 4.72E-02 | 1.489  |
| HELZ2     | helicase with zinc finger 2, transcriptional coactivator                             |          |        |          |        | 6.15E-04 | 2.306  | 4.72E-02 | 1.675  |
| HNRNPA2B1 | heterogeneous nuclear ribonucleoprotein A2/B1                                        | 3.72E-01 | -1.186 | 9.16E-01 | 1.021  | 7.09E-02 | -1.33  | 2.14E-03 | 2.533  |
| IGBP1     | immunoglobulin (CD79A) binding protein 1                                             | 8.70E-01 | -1.056 | 1.00E+00 | -1.076 | 2.00E-01 | -1.267 | 7.97E-03 | -1.947 |
| IL18      | interleukin 18                                                                       | 3.74E-01 | -1.508 | 6.32E-01 | -1.222 | 5.63E-03 | 1.981  | 1.43E-03 | 1.372  |
| IRF2BP1   | interferon regulatory factor 2 binding protein 1                                     | 7.55E-01 | -1.075 | 1.00E+00 | 0      | 2.06E-01 | -1.286 | 4.85E-02 | -2.121 |
| KANK2     | KN motif and ankyrin repeat domains 2                                                | 1.00E+00 | 0      | 1.00E+00 | 0      | 8.80E-02 | -1.928 | 6.18E-03 | -2.708 |
| KCTD1     | potassium channel tetramerization domain containing 1                                | 1.00E+00 | 0      | 1.00E+00 | 0      | 5.53E-02 | 1.501  | 4.47E-02 | 1.634  |
| MBD1      | methyl-CpG binding domain protein 1                                                  | 1.00E+00 | 0      | 1.00E+00 | 0      | 3.34E-01 | -1.117 | 2.46E-03 | -1.734 |
| MCM7      | minichromosome maintenance complex component 7                                       | 2.36E-01 | -1.658 | 1.82E-01 | -1.311 | 1.73E-01 | -1.253 | 4.74E-02 | -1.355 |
| MMS19     | MMS19 nucleotide excision repair homolog (S. cerevisiae)                             | 1.00E+00 | 0      | 1.00E+00 | 0      | 4.19E-01 | 1.154  | 1.89E-02 | 1.478  |
| MTERF3    | mitochondrial transcription termination factor 3                                     | 1.00E+00 | 0      | 1.00E+00 | 0      | 1.35E-03 | -4.077 | 1.33E-02 | -6.005 |
| MYCBP     | MYC binding protein                                                                  | 1.00E+00 | -1.266 | 1.00E+00 | -1.433 | 1.96E-01 | 1.464  | 4.50E-02 | -1.363 |
| NFKB1     | nuclear factor of kappa light polypeptide gene enhancer in B-cells 1                 | 7.54E-01 | -1.28  | 8.35E-01 | 1.177  | 9.42E-02 | 1.205  | 1.63E-02 | 1.226  |
| NKAP      | NFKB activating protein                                                              | 1.00E+00 | 0      | 1.00E+00 | 0      | 5.51E-01 | 1.185  | 3.79E-02 | 1.518  |
| NOLC1     | nucleolar and coiled-body phosphoprotein 1                                           | 5.80E-01 | 1.785  | 8.25E-01 | 1.283  | 4.09E-06 | -1.731 | 3.65E-02 | -8.09  |
| NPM1      | nucleophosmin (nucleolar phosphoprotein B23, numatrin)                               | 3.04E-01 | -1.476 | 1.10E-01 | -1.239 | 2.68E-01 | -1.67  | 1.58E-02 | 1.215  |
| OGT       | O-linked N-acetylglucosamine (GlcNAc) transferase                                    | 4.88E-01 | 1.135  | 9.90E-01 | 1.007  | 9.40E-01 | 1.015  | 2.70E-02 | -1.424 |
| PHGDH     | phosphoglycerate dehydrogenase                                                       | 6.87E-01 | -1.119 | 3.93E-01 | 1.376  | 1.42E-02 | -1.542 | 6.59E-04 | 1.472  |
| PIAS3     | protein inhibitor of activated STAT, 3                                               |          |        |          |        | 9.02E-02 | 4.761  | 1.35E-02 | 6.194  |
| PKD1      | polycystic kidney disease 1 (autosomal dominant)                                     |          |        |          |        | 3.21E-02 | 1.598  | 1.83E-02 | 1.797  |
| PML       | promyelocytic leukemia                                                               | 4.01E-01 | -1.174 | 2.33E-02 | -2.367 | 7.11E-01 | 1.114  | 4.66E-02 | -1.449 |
| PPP1CC    | protein phosphatase 1, catalytic subunit, gamma isozyme                              | 1.00E+00 | 0      | 1.00E+00 | -3.795 | 3.37E-02 | 1.428  | 2.43E-03 | 1.45   |
| PPP1R13L  | protein phosphatase 1, regulatory subunit 13 like                                    | 4.18E-01 | 1.766  | 3.18E-01 | -1.383 | 3.89E-01 | 1.17   | 4.07E-02 | -1.352 |
| PSIP1     | PC4 and SFRS1 interacting protein 1                                                  | 4.98E-01 | -1.186 | 1.00E+00 | 1.241  | 1.30E-01 | -1.136 | 4.78E-03 | -1.159 |
| RBBP7     | retinoblastoma binding protein 7                                                     | 9.33E-01 | 1.031  | 7.44E-01 | 1.077  | 1.38E-02 | -3.281 | 6.28E-03 | -6.779 |



|         |                                                                                 |          |        |          |        |          |        |          |        |
|---------|---------------------------------------------------------------------------------|----------|--------|----------|--------|----------|--------|----------|--------|
| RFX5    | regulatory factor X, 5 (influences HLA class II expression)                     | 1.00E+00 | 0      | 1.00E+00 | 0      | 7.07E-02 | 1.684  | 7.53E-03 | 1.675  |
| RIPK1   | receptor (TNFRSF)-interacting serine-threonine kinase 1                         | 1.00E+00 | 0      | 1.00E+00 | 0      | 3.61E-01 | 1.444  | 3.39E-03 | -1.61  |
| RPS6KB1 | ribosomal protein S6 kinase, 70kDa, polypeptide 1                               | 1.00E+00 | 1.861  | 1.00E+00 | 1.983  | 1.04E-01 | -1.675 | 3.62E-02 | -1.878 |
| SIX4    | SIX homeobox 4                                                                  | 1.00E+00 | 0      | 1.00E+00 | 0      | 5.98E-02 | 1.77   | 4.28E-02 | 2.119  |
| SMAD2   | SMAD family member 2                                                            | 9.07E-01 | -1.022 | 1.00E+00 | -1.036 | 3.94E-01 | 1.118  | 3.74E-02 | -1.304 |
| STRAP   | serine/threonine kinase receptor associated protein                             | 4.66E-01 | -1.445 | 7.06E-01 | -1.186 | 2.65E-02 | -1.333 | 6.87E-03 | -1.382 |
| TAF4    | TAF4 RNA polymerase II, TATA box binding protein (TBP)-associated factor, 135kD | 1.00E+00 | 0      | 1.00E+00 | 0      | 8.06E-01 | -1.053 | 4.00E-02 | -1.449 |
| TAF9    | TAF9 RNA polymerase II, TATA box binding protein (TBP)-associated factor, 32kD  | 1.00E+00 | 0      | 1.00E+00 | 1.159  | 6.24E-01 | -1.18  | 4.79E-03 | -1.507 |
| TLR3    | toll-like receptor 3                                                            |          |        |          |        | 4.57E-02 | -1.3   | 4.35E-02 | -2.468 |
| TRAF6   | TNF receptor-associated factor 6, E3 ubiquitin protein ligase                   | 1.00E+00 | 0      | 1.00E+00 | 0      | 1.29E-01 | -1.539 | 5.71E-03 | -1.943 |
| TSC22D1 | TSC22 domain family, member 1                                                   | 1.00E+00 | 0      | 1.00E+00 | 0      | 1.00E+00 | -3.302 | 2.90E-02 | -3.96  |
| UNC45A  | unc-45 homolog A (C. elegans)                                                   | 3.92E-01 | -1.183 | 6.63E-01 | 1.063  | 5.46E-02 | -1.327 | 3.87E-02 | -1.362 |
| VEZF1   | vascular endothelial zinc finger 1                                              |          |        |          |        | 6.06E-02 | -2.015 | 7.20E-03 | -1.926 |
| YBX3    | Y box binding protein 3                                                         | 6.81E-01 | 1.32   | 4.39E-01 | -1.621 | 3.77E-02 | -1.3   | 1.55E-02 | -1.41  |
| ZNF593  | zinc finger protein 593                                                         | 1.00E+00 | 0      | 1.00E+00 | 0      | 2.07E-01 | -1.615 | 8.80E-03 | -1.441 |



None **LMP1-no Inhibitors: Transcription of DNA (P = 1)** LMP1 no Inhs LMP2 no Inhs LMP1 with Inhs LMP2 with Inhs

None **LMP2-no Inhibitors: Transcription of DNA (P = 1)** LMP1 no Inhs LMP2 no Inhs LMP1 with Inhs LMP2 with Inhs

None **LMP1-with Inhibitors: Transcription of DNA (P = 1)** LMP1 no Inhs LMP2 no Inhs LMP1 with Inhs LMP2 with Inhs

|               |                                                                      | <b>LMP1 no Inhs</b> |                    | <b>LMP2 no Inhs</b> |                    | <b>LMP1 with Inhs</b> |                    | <b>LMP2 with Inhs</b> |                    |
|---------------|----------------------------------------------------------------------|---------------------|--------------------|---------------------|--------------------|-----------------------|--------------------|-----------------------|--------------------|
| <b>Symbol</b> | <b>Entrez Gene Name</b>                                              | <b>p-value</b>      | <b>Fold Change</b> | <b>p-value</b>      | <b>Fold Change</b> | <b>p-value</b>        | <b>Fold Change</b> | <b>p-value</b>        | <b>Fold Change</b> |
| ABLIM3        | actin binding LIM protein family, member 3                           | 1.00E+00            | -1.711             | 1.00E+00            | 0                  | 8.58E-01              | -1.06              | 2.38E-02              | -2.771             |
| ABT1          | activator of basal transcription 1                                   | 1.00E+00            | 0                  | 1.00E+00            | 0                  | 4.46E-02              | -1.639             | 1.10E-02              | -2.15              |
| ASCC1         | activating signal cointegrator 1 complex subunit 1                   | 1.00E+00            | 0                  | 1.00E+00            | 0                  | 1.38E-01              | -1.522             | 3.15E-02              | -1.873             |
| ATF1          | activating transcription factor 1                                    |                     |                    |                     |                    | 5.54E-01              | 1.108              | 3.67E-02              | 1.33               |
| ATRX          | alpha thalassemia/mental retardation syndrome X-linked               | 1.00E+00            | 1.154              | 1.00E+00            | 0                  | 1.46E-01              | -1.223             | 2.48E-02              | -1.745             |
| ATXN7L3       | ataxin 7-like 3                                                      |                     |                    |                     |                    | 5.71E-03              | -1.231             | 4.19E-02              | 1.368              |
| CAPN15        | calpain 15                                                           | 1.00E+00            | 0                  | 1.00E+00            | 0                  | 9.67E-02              | 2.017              | 2.23E-02              | 2.423              |
| CBX4          | chromobox homolog 4                                                  | 1.00E+00            | 0                  | 1.00E+00            | 0                  | 5.50E-01              | -1.056             | 4.31E-02              | 1.425              |
| CDKN1C        | cyclin-dependent kinase inhibitor 1C (p57, Kip2)                     | 1.00E+00            | 0                  | 1.00E+00            | 0                  | 2.48E-01              | 1.536              | 4.13E-03              | -1.767             |
| CEBPD         | CCAAT/enhancer binding protein (C/EBP), delta                        | 9.02E-02            | -1.547             | 2.94E-01            | -1.458             | 6.40E-01              | 1.213              | 3.42E-02              | 1.828              |
| CHD1          | chromodomain helicase DNA binding protein 1                          | 1.00E+00            | 0                  | 1.00E+00            | 0                  | 1.19E-02              | -3.257             | 2.45E-02              | -2.212             |
| CHD3          | chromodomain helicase DNA binding protein 3                          | 1.00E+00            | 0                  | 1.00E+00            | 0                  | 9.24E-02              | -1.173             | 8.40E-03              | 1.216              |
| CHD4          | chromodomain helicase DNA binding protein 4                          | 7.52E-01            | -1.213             | 7.10E-01            | 1.11               | 9.81E-02              | -1.276             | 4.86E-02              | -1.42              |
| DAB2IP        | DAB2 interacting protein                                             | 1.00E+00            | 0                  | 1.00E+00            | 0                  | 1.99E-01              | 1.401              | 3.60E-02              | -1.565             |
| ECSIT         | ECSIT signalling integrator                                          | 1.00E+00            | 0                  | 1.00E+00            | 0                  | 1.41E-02              | -2.365             | 1.77E-02              | -2.634             |
| ENO1          | enolase 1, (alpha)                                                   | 3.39E-01            | 1.109              | 1.62E-01            | 1.484              | 6.46E-03              | -2.532             | 8.54E-03              | -2.414             |
| ERCC2         | excision repair cross-complementation group 2                        | 1.00E+00            | 0                  | 1.00E+00            | 0                  | 9.09E-01              | 1.06               | 4.97E-02              | 1.761              |
| FHOD1         | formin homology 2 domain containing 1                                | 2.01E-01            | -2.55              | 1.00E+00            | -1.756             | 7.70E-03              | -2.15              | 1.38E-02              | -2.1               |
| FUBP3         | far upstream element (FUSE) binding protein 3                        | 8.49E-01            | -1.062             | 6.42E-01            | 1.068              | 1.17E-02              | -1.238             | 1.72E-02              | -1.155             |
| GTF2I         | general transcription factor Ili                                     | 2.48E-01            | -1.295             | 5.24E-01            | -1.528             | 5.99E-03              | -1.282             | 1.35E-02              | -1.186             |
| GTF3C1        | general transcription factor IIIC, polypeptide 1, alpha 220kDa       | 1.00E+00            | -2.402             | 1.00E+00            | -1.807             | 1.83E-01              | -1.864             | 4.22E-02              | -2.687             |
| GTF3C2        | general transcription factor IIIC, polypeptide 2, beta 110kDa        | 1.00E+00            | -1.152             | 1.00E+00            | 1.455              | 7.51E-02              | -1.646             | 1.13E-02              | -1.855             |
| HELZ2         | helicase with zinc finger 2, transcriptional coactivator             |                     |                    |                     |                    | 6.15E-04              | 2.306              | 4.72E-02              | 1.675              |
| IGBP1         | immunoglobulin (CD79A) binding protein 1                             | 8.70E-01            | -1.056             | 1.00E+00            | -1.076             | 2.00E-01              | -1.267             | 7.97E-03              | -1.947             |
| IRF2BP1       | interferon regulatory factor 2 binding protein 1                     | 7.55E-01            | -1.075             | 1.00E+00            | 0                  | 2.06E-01              | -1.286             | 4.85E-02              | -2.121             |
| KANK2         | KN motif and ankyrin repeat domains 2                                | 1.00E+00            | 0                  | 1.00E+00            | 0                  | 8.80E-02              | -1.928             | 6.18E-03              | -2.708             |
| KCTD1         | potassium channel tetramerization domain containing 1                | 1.00E+00            | 0                  | 1.00E+00            | 0                  | 5.53E-02              | 1.501              | 4.47E-02              | 1.634              |
| MBD1          | methyl-CpG binding domain protein 1                                  | 1.00E+00            | 0                  | 1.00E+00            | 0                  | 3.34E-01              | -1.117             | 2.46E-03              | -1.734             |
| MCM7          | minichromosome maintenance complex component 7                       | 2.36E-01            | -1.658             | 1.82E-01            | -1.311             | 1.73E-01              | -1.253             | 4.74E-02              | -1.355             |
| MMS19         | MMS19 nucleotide excision repair homolog (S. cerevisiae)             | 1.00E+00            | 0                  | 1.00E+00            | 0                  | 4.19E-01              | 1.154              | 1.89E-02              | 1.478              |
| MTERF3        | mitochondrial transcription termination factor 3                     | 1.00E+00            | 0                  | 1.00E+00            | 0                  | 1.35E-03              | -4.077             | 1.33E-02              | -6.005             |
| MYCBP         | MYC binding protein                                                  | 1.00E+00            | -1.266             | 1.00E+00            | -1.433             | 1.96E-01              | 1.464              | 4.50E-02              | -1.363             |
| NFKB1         | nuclear factor of kappa light polypeptide gene enhancer in B-cells 1 | 7.54E-01            | -1.28              | 8.35E-01            | 1.177              | 9.42E-02              | 1.205              | 1.63E-02              | 1.226              |
| NKAP          | NFKB activating protein                                              | 1.00E+00            | 0                  | 1.00E+00            | 0                  | 5.51E-01              | 1.185              | 3.79E-02              | 1.518              |
| NOLC1         | nucleolar and coiled-body phosphoprotein 1                           | 5.80E-01            | 1.785              | 8.25E-01            | 1.283              | 4.09E-06              | -1.731             | 3.65E-02              | -8.09              |
| PKD1          | polycystic kidney disease 1 (autosomal dominant)                     |                     |                    |                     |                    | 3.21E-02              | 1.598              | 1.83E-02              | 1.797              |
| PML           | promyelocytic leukemia                                               | 4.01E-01            | -1.174             | 2.33E-02            | -2.367             | 7.11E-01              | 1.114              | 4.66E-02              | -1.449             |
| PPP1R13L      | protein phosphatase 1, regulatory subunit 13 like                    | 4.18E-01            | 1.766              | 3.18E-01            | -1.383             | 3.89E-01              | 1.17               | 4.07E-02              | -1.352             |
| PSIP1         | PC4 and SFRS1 interacting protein 1                                  | 4.98E-01            | -1.186             | 1.00E+00            | 1.241              | 1.30E-01              | -1.136             | 4.78E-03              | -1.159             |

|         |                                                                                 |          |        |          |        |          |        |          |        |
|---------|---------------------------------------------------------------------------------|----------|--------|----------|--------|----------|--------|----------|--------|
| RBBP7   | retinoblastoma binding protein 7                                                | 9.33E-01 | 1.031  | 7.44E-01 | 1.077  | 1.38E-02 | -3.281 | 6.28E-03 | -6.779 |
| RIPK1   | receptor (TNFRSF)-interacting serine-threonine kinase 1                         | 1.00E+00 | 0      | 1.00E+00 | 0      | 3.61E-01 | 1.444  | 3.39E-03 | -1.61  |
| SIX4    | SIX homeobox 4                                                                  | 1.00E+00 | 0      | 1.00E+00 | 0      | 5.98E-02 | 1.77   | 4.28E-02 | 2.119  |
| SMAD2   | SMAD family member 2                                                            | 9.07E-01 | -1.022 | 1.00E+00 | -1.036 | 3.94E-01 | 1.118  | 3.74E-02 | -1.304 |
| STRAP   | serine/threonine kinase receptor associated protein                             | 4.66E-01 | -1.445 | 7.06E-01 | -1.186 | 2.65E-02 | -1.333 | 6.87E-03 | -1.382 |
| TAF4    | TAF4 RNA polymerase II, TATA box binding protein (TBP)-associated factor, 135kD | 1.00E+00 | 0      | 1.00E+00 | 0      | 8.06E-01 | -1.053 | 4.00E-02 | -1.449 |
| TAF9    | TAF9 RNA polymerase II, TATA box binding protein (TBP)-associated factor, 32kDa |          |        | 1.00E+00 | 1.159  | 6.24E-01 | -1.18  | 4.79E-03 | -1.507 |
| TLR3    | toll-like receptor 3                                                            |          |        |          |        | 4.57E-02 | -1.3   | 4.35E-02 | -2.468 |
| TRAF6   | TNF receptor-associated factor 6, E3 ubiquitin protein ligase                   | 1.00E+00 | 0      | 1.00E+00 | 0      | 1.29E-01 | -1.539 | 5.71E-03 | -1.943 |
| TSC22D1 | TSC22 domain family, member 1                                                   | 1.00E+00 | 0      | 1.00E+00 | 0      | 1.00E+00 | -3.302 | 2.90E-02 | -3.96  |
| VEZF1   | vascular endothelial zinc finger 1                                              |          |        |          |        | 6.06E-02 | -2.015 | 7.20E-03 | -1.926 |
| YBX3    | Y box binding protein 3                                                         | 6.81E-01 | 1.32   | 4.39E-01 | -1.621 | 3.77E-02 | -1.3   | 1.55E-02 | -1.41  |
| ZNF593  | zinc finger protein 593                                                         | 1.00E+00 | 0      | 1.00E+00 | 0      | 2.07E-01 | -1.615 | 8.80E-03 | -1.441 |

**LMP1-no Inhibitors: Cleavage and PolyAdenylation of Pre-mRNA (P = 1)**

None

**LMP2-no Inhibitors: Cleavage and PolyAdenylation of Pre-mRNA (P = 0.0003)**

| Symbol | Entrez Gene Name                                      | LMP1 no Inhs |             | LMP2 no Inhs |             | LMP1 with Inhs |             | LMP2 with Inhs |             |
|--------|-------------------------------------------------------|--------------|-------------|--------------|-------------|----------------|-------------|----------------|-------------|
|        |                                                       | p-value      | Fold Change | p-value      | Fold Change | p-value        | Fold Change | p-value        | Fold Change |
| CPSF6  | cleavage and polyadenylation specific factor 6, 68kDa | 4.86E-01     | -1.65       | 1.63E-03     | 1.269       | 9.69E-01       | 1.014       | 8.00E-01       | -1.077      |
| PABPN1 | poly(A) binding protein, nuclear 1                    | 4.09E-01     | -1.239      | 1.42E-02     | 1.245       | 4.24E-01       | -1.182      | 2.09E-01       | 1.491       |

**LMP1-with Inhibitors: Cleavage and PolyAdenylation of Pre-mRNA (P = 0.04)**

| Symbol | Entrez Gene Name                                          | LMP1 no Inhs |             | LMP2 no Inhs |             | LMP1 with Inhs |             | LMP2 with Inhs |             |
|--------|-----------------------------------------------------------|--------------|-------------|--------------|-------------|----------------|-------------|----------------|-------------|
|        |                                                           | p-value      | Fold Change | p-value      | Fold Change | p-value        | Fold Change | p-value        | Fold Change |
| CPSF3  | cleavage and polyadenylation specific factor 3, 73kDa     | 2.10E-01     | -1.563      | 4.60E-01     | -1.418      | 3.02E-02       | -1.601      | 1.42E-01       | -1.175      |
| CSTF2  | cleavage stimulation factor, 3' pre-RNA, subunit 2, 64kDa | 7.34E-01     | -1.161      | 7.83E-01     | -1.222      | 1.17E-02       | -1.791      | 2.56E-01       | -1.242      |

**LMP2-with Inhibitors: Cleavage and PolyAdenylation of Pre-mRNA (P = 1)**

None

**LMP1-no Inhibitors: DNA methylation and transcriptional repression (P = 1)**

|      | LMP1 no Inhs | LMP2 no Inhs | LMP1 with Inhs | LMP2 with Inhs |
|------|--------------|--------------|----------------|----------------|
| none |              |              |                |                |

**LMP2-no Inhibitors: DNA methylation and transcriptional repression (P = 1)**

|      | LMP1 no Inhs | LMP2 no Inhs | LMP1 with Inhs | LMP2 with Inhs |
|------|--------------|--------------|----------------|----------------|
| none |              |              |                |                |

**LMP1-with Inhibitors: DNA methylation and transcriptional repression (P = 0.0018)**

| Symbol | Entrez Gene Name                 | LMP1 no Inhs |             | LMP2 no Inhs |             | LMP1 with Inhs |             | LMP2 with Inhs |             |
|--------|----------------------------------|--------------|-------------|--------------|-------------|----------------|-------------|----------------|-------------|
|        |                                  | p-value      | Fold Change | p-value      | Fold Change | p-value        | Fold Change | p-value        | Fold Change |
| HDAC2  | histone deacetylase 2            | 1.00E+00     | -3.841      | 1.00E+00     | -1.241      | 4.63E-02       | -1.22       | 4.45E-01       | -1.123      |
| RBBP7  | retinoblastoma binding protein 7 | 9.33E-01     | 1.031       | 7.44E-01     | 1.077       | 1.38E-02       | -3.281      | 6.28E-03       | -6.779      |
| SAP18  | Sin3A-associated protein, 18kDa  | 3.87E-01     | -1.837      | 1.00E+00     | -1.141      | 1.58E-02       | -1.203      | 2.11E-01       | 1.25        |
| SAP130 | Sin3A-associated protein, 130kDa | 1.00E+00     | 0           | 1.00E+00     | 0           | 8.35E-03       | -1.877      | 8.34E-01       | 1.023       |

**LMP2-with Inhibitors: DNA methylation and transcriptional repression (P = 0.0062)**

| Symbol | Entrez Gene Name                            | LMP1 no Inhs |             | LMP2 no Inhs |             | LMP1 with Inhs |             | LMP2 with Inhs |             |
|--------|---------------------------------------------|--------------|-------------|--------------|-------------|----------------|-------------|----------------|-------------|
|        |                                             | p-value      | Fold Change | p-value      | Fold Change | p-value        | Fold Change | p-value        | Fold Change |
| CHD3   | chromodomain helicase DNA binding protein 3 | 1.00E+00     | 0           | 1.00E+00     | 0           | 9.24E-02       | -1.173      | 8.40E-03       | 1.216       |
| CHD4   | chromodomain helicase DNA binding protein 4 | 7.52E-01     | -1.213      | 7.10E-01     | 1.11        | 9.81E-02       | -1.276      | 4.86E-02       | -1.42       |
| RBBP7  | retinoblastoma binding protein 7            | 9.33E-01     | 1.031       | 7.44E-01     | 1.077       | 1.38E-02       | -3.281      | 6.28E-03       | -6.779      |



**LMP1-no Inhibitors: tRNA charging (P = 0.0118)**

| Symbol | Entrez Gene Name                           |
|--------|--------------------------------------------|
| AARS   | alanyl-tRNA synthetase                     |
| FARSB  | phenylalanyl-tRNA synthetase, beta subunit |
| GARS   | glycyl-tRNA synthetase                     |

| LMP1 no Inhs |             | LMP2 no Inhs |             | LMP1 with Inhs |             | LMP2 with Inhs |             |
|--------------|-------------|--------------|-------------|----------------|-------------|----------------|-------------|
| p-value      | Fold Change | p-value      | Fold Change | p-value        | Fold Change | p-value        | Fold Change |
| 1.92E-02     | -1.264      | 8.69E-01     | -1.099      | 8.53E-03       | -1.189      | 2.05E-01       | 1.093       |
| 1.46E-02     | -1.791      | 5.16E-01     | -1.186      | 3.76E-02       | -1.225      | 8.77E-01       | 1.013       |
| 4.89E-02     | -1.532      | 3.92E-02     | -2.567      | 8.52E-01       | -1.077      | 4.86E-01       | -1.325      |

**LMP2-no Inhibitors: tRNA charging (P = 0.1665)**

| Symbol | Entrez Gene Name       |
|--------|------------------------|
| GARS   | glycyl-tRNA synthetase |

| LMP1 no Inhs |             | LMP2 no Inhs |             | LMP1 with Inhs |             | LMP2 with Inhs |             |
|--------------|-------------|--------------|-------------|----------------|-------------|----------------|-------------|
| p-value      | Fold Change | p-value      | Fold Change | p-value        | Fold Change | p-value        | Fold Change |
| 4.89E-02     | -1.532      | 3.92E-02     | -2.567      | 8.52E-01       | -1.077      | 4.86E-01       | -1.325      |

**LMP1-with Inhibitors: tRNA charging (P = 0.071)**

| Symbol | Entrez Gene Name                           |
|--------|--------------------------------------------|
| AARS   | alanyl-tRNA synthetase                     |
| DARS   | aspartyl-tRNA synthetase                   |
| EPRS   | glutamyl-prolyl-tRNA synthetase            |
| FARSB  | phenylalanyl-tRNA synthetase, beta subunit |
| VARs   | valyl-tRNA synthetase                      |

| LMP1 no Inhs |             | LMP2 no Inhs |             | LMP1 with Inhs |             | LMP2 with Inhs |             |
|--------------|-------------|--------------|-------------|----------------|-------------|----------------|-------------|
| p-value      | Fold Change | p-value      | Fold Change | p-value        | Fold Change | p-value        | Fold Change |
| 1.92E-02     | -1.264      | 8.69E-01     | -1.099      | 8.53E-03       | -1.189      | 2.05E-01       | 1.093       |
| 9.00E-01     | -1.035      | 8.33E-01     | 1.067       | 4.73E-02       | -1.295      | 2.76E-01       | -1.181      |
| 8.40E-02     | -1.28       | 4.72E-01     | -1.176      | 3.69E-02       | -1.214      | 6.05E-01       | 1.029       |
| 1.46E-02     | -1.791      | 5.16E-01     | -1.186      | 3.76E-02       | -1.225      | 8.77E-01       | 1.013       |
| 1.46E-01     | -1.412      | 6.13E-01     | 1.04        | 2.67E-02       | -1.144      | 2.92E-01       | -1.065      |

**LMP2-with Inhibitors: tRNA charging (P = 0.467)**

| Symbol | Entrez Gene Name          |
|--------|---------------------------|
| CARS   | cysteinyl-tRNA synthetase |
| RARS   | arginyl-tRNA synthetase   |

| LMP1 no Inhs |             | LMP2 no Inhs |             | LMP1 with Inhs |             | LMP2 with Inhs |             |
|--------------|-------------|--------------|-------------|----------------|-------------|----------------|-------------|
| p-value      | Fold Change | p-value      | Fold Change | p-value        | Fold Change | p-value        | Fold Change |
| 8.68E-01     | 1.022       | 7.10E-01     | 1.067       | 1.54E-01       | -1.124      | 1.19E-02       | 1.196       |
| 7.76E-01     | -1.084      | 9.21E-01     | -1.036      | 2.97E-01       | -1.164      | 2.82E-03       | -1.816      |
