# Supplementary material for: Global Proteomic Changes Induced by the Epstein-Barr Virus Oncoproteins Latent Membrane Protein 1 and 2A
Source: PubMed Central journal article supplement (PMC6016245; doi:10.1128/mbio.00959-18), 2018-06-19
Supplement: mbo003183928st4.pdf [file mbo003183928st4.pdf]

## Supplemental Table-4

### LMP1-no Inhibitors: Integrin signaling (P = 0.0063)

| Symbol | Entrez Gene Name                                    | LMP1 no Inhs |             | LMP2 no Inhs |             | LMP1 with Inhs |             | LMP2 with Inhs |             |
|--------|-----------------------------------------------------|--------------|-------------|--------------|-------------|----------------|-------------|----------------|-------------|
|        |                                                     | p-value      | Fold Change | p-value      | Fold Change | p-value        | Fold Change | p-value        | Fold Change |
| ARPC4  | actin related protein 2/3 complex, subunit 4, 20kDa | 1.11E-02     | -1.511      | 9.32E-01     | -1.010      | 5.30E-01       | -1.042      | 2.83E-01       | 1.177       |
| CAPN1  | calpain 1, (mu/l) large subunit                     | 4.38E-02     | -1.239      | 9.13E-01     | 1.017       | 1.09E-01       | 1.277       | 8.11E-01       | 1.037       |
| CAPNS1 | calpain, small subunit 1                            | 1.07E-02     | 1.386       | 1.35E-01     | 1.316       | 2.97E-01       | 1.078       | 1.28E-01       | -1.125      |
| RAP1B  | RAP1B, member of RAS oncogene family                | 3.17E-02     | -3.786      | 1.00E00      | -3.401      | 8.56E-01       | 1.071       | 9.80E-01       | 1.010       |
| VCL    | vinculin                                            | 4.67E-02     | 1.468       | 9.93E-01     | -1.001      | 9.62E-02       | -1.607      | 1.00E00        | -1.583      |

### LMP2-no Inhibitors: Integrin signaling (P = 1)

None

### LMP1-with Inhibitors: Integrin signaling (P = 3.67 x 10<sup>-5</sup>)

| Symbol | Entrez Gene Name                                                                        | LMP1 no Inhs |             | LMP2 no Inhs |             | LMP1 with Inhs |             | LMP2 with Inhs |             |
|--------|-----------------------------------------------------------------------------------------|--------------|-------------|--------------|-------------|----------------|-------------|----------------|-------------|
|        |                                                                                         | p-value      | Fold Change | p-value      | Fold Change | p-value        | Fold Change | p-value        | Fold Change |
| ACTG1  | actin, gamma 1                                                                          | 4.38E-01     | 2.212       | 9.31E-01     | 1.090       | 6.29E-03       | 1.182       | 1.00E00        | -1.548      |
| ACTN1  | actinin, alpha 1                                                                        | 2.46E-01     | 1.725       | 7.05E-01     | -1.250      | 1.22E-03       | 1.884       | 9.70E-01       | 1.079       |
| ACTN4  | actinin, alpha 4                                                                        | 3.46E-01     | 1.264       | 9.40E-01     | 1.023       | 3.67E-04       | 2.025       | 5.14E-01       | 1.040       |
| ARPC1A | actin related protein 2/3 complex, subunit 1A, 41kDa                                    | 3.33E-01     | 1.922       | 7.89E-01     | 1.212       | 3.81E-02       | 1.382       | 2.37E-01       | -1.175      |
| CRKL   | v-crk avian sarcoma virus CT10 oncogene homolog-like                                    | 7.18E-01     | 1.127       | 9.97E-01     | 1.001       | 3.25E-02       | 2.215       | 7.70E-01       | 1.132       |
| GRB7   | growth factor receptor-bound protein 7                                                  | 1.00E00      | 0.000       | 1.00E00      | 0.000       | 3.20E-02       | 1.867       | 1.00E00        | 1.058       |
| ILKAP  | integrin-linked kinase-associated serine/threonine phosphatase                          | 1.00E00      | -1.000      | 1.00E00      | -1.490      | 4.27E-02       | -1.589      | 2.27E-01       | -1.253      |
| ITGA5  | integrin, alpha 5 (fibronectin receptor, alpha polypeptide)                             | 3.64E-01     | -2.172      | 1.00E00      | -3.726      | 4.33E-02       | -2.098      | 2.27E-02       | -2.119      |
| ITGB4  | integrin, beta 4                                                                        | 5.06E-01     | -1.180      | 7.55E-01     | -1.092      | 3.98E-02       | -1.164      | 1.00E00        | -1.292      |
| MAP2K2 | mitogen-activated protein kinase kinase 2                                               | 1.00E00      | -1.030      | 1.00E00      | 1.079       | 2.57E-02       | -1.397      | 2.02E-02       | -1.306      |
| MYL9   | myosin, light chain 9, regulatory                                                       | 1.00E00      | 0.000       | 1.00E00      | 0.000       | 4.54E-02       | 3.181       | 1.00E00        | -1.094      |
| NCK1   | NCK adaptor protein 1                                                                   | 1.00E00      | 1.371       | 1.00E00      | 1.688       | 3.97E-03       | 1.850       | 3.49E-01       | 1.681       |
| PAK1   | p21 protein (Cdc42/Rac)-activated kinase 1                                              |              |             |              |             | 3.34E-02       | -1.594      | 1.00E00        |             |
| RAC2   | ras-related C3 botulinum toxin substrate 2 (rho family, small GTP binding protein Rac2) | 1.00E00      | 0.000       | 1.00E00      | 0.000       | 1.04E-03       | 1.399       | 7.67E-02       | -1.210      |
| RAP2B  | RAP2B, member of RAS oncogene family                                                    | 1.00E00      | 0.000       | 1.00E00      | 0.000       | 2.53E-04       | 2.586       | 5.82E-01       | -1.170      |
| RHOT1  | ras homolog family member T1                                                            | 1.00E00      | 1.452       | 1.00E00      | -1.341      | 4.97E-02       | 2.050       | 6.21E-01       | 1.195       |
| TTN    | titin                                                                                   | 1.00E00      | 0.000       | 1.00E00      | 0.000       | 1.49E-02       | 1.477       | 7.70E-02       | 1.501       |

### LMP2-with Inhibitors: Integrin signaling (P = 0.1914)

| Symbol | Entrez Gene Name                                                                         | LMP1 no Inhs |             | LMP2 no Inhs |             | LMP1 with Inhs |             | LMP2 with Inhs |             |
|--------|------------------------------------------------------------------------------------------|--------------|-------------|--------------|-------------|----------------|-------------|----------------|-------------|
|        |                                                                                          | p-value      | Fold Change | p-value      | Fold Change | p-value        | Fold Change | p-value        | Fold Change |
| ACTR2  | ARP2 actin-related protein 2 homolog (yeast)                                             | 3.55E-01     | 1.594       | 9.05E-01     | -1.028      | 8.73E-01       | -1.010      | 4.13E-02       | -1.124      |
| ITGA5  | integrin, alpha 5 (fibronectin receptor, alpha polypeptide)                              | 3.64E-01     | -2.172      | 1.00E00      | -3.726      | 4.33E-02       | -2.098      | 2.27E-02       | -2.119      |
| ITGAE  | integrin, alpha E (antigen CD103, human mucosal lymphocyte antigen 1; alpha polypeptide) |              |             |              |             | 7.25E-01       | -1.098      | 4.70E-02       | -1.586      |
| MAP2K2 | mitogen-activated protein kinase kinase 2                                                | 1.00E00      | -1.030      | 1.00E00      | 1.079       | 2.57E-02       | -1.397      | 2.02E-02       | -1.306      |
| PXN    | paxillin                                                                                 | 2.26E-01     | 1.287       | 1.27E-01     | -1.543      | 3.24E-01       | 1.546       | 1.68E-02       | -1.271      |
| TLN1   | talin 1                                                                                  | 6.90E-01     | 1.081       | 1.64E-01     | -1.316      | 7.06E-02       | 1.063       | 2.74E-02       | -1.154      |

**LMP1-no Inhibitors: ILK signaling (P = 0.294)**

| Symbol | Entrez Gene Name | LMP1 no Inhs |             | LMP2 no Inhs |             | LMP1 with Inhs |             | LMP2 with Inhs |             |
|--------|------------------|--------------|-------------|--------------|-------------|----------------|-------------|----------------|-------------|
|        |                  | p-value      | Fold Change | p-value      | Fold Change | p-value        | Fold Change | p-value        | Fold Change |
| DSP    | desmoplakin      | 1.42E-02     | 1.418       | 6.00E-01     | 1.081       | 7.88E-01       | 1.044       | 8.70E-01       | 1.019       |
| KRT18  | keratin 18       | 1.12E-02     | -1.391      | 3.43E-01     | -1.225      | 2.47E-01       | 1.202       | 3.85E-01       | 1.15        |

**LMP2-no Inhibitors: ILK signaling (P = 1)**

none

**LMP1-with Inhibitors: ILK signaling (P = 0.0052)**

| Symbol     | Entrez Gene Name                                               | LMP1 no Inhs |             | LMP2 no Inhs |             | LMP1 with Inhs |             | LMP2 with Inhs |             |
|------------|----------------------------------------------------------------|--------------|-------------|--------------|-------------|----------------|-------------|----------------|-------------|
|            |                                                                | p-value      | Fold Change | p-value      | Fold Change | p-value        | Fold Change | p-value        | Fold Change |
| ACTG1      | actin, gamma 1                                                 | 4.38E-01     | 2.212       | 9.31E-01     | 1.09        | 6.29E-03       | 1.182       | 1.00E+00       | -1.548      |
| ACTN1      | actinin, alpha 1                                               | 2.46E-01     | 1.725       | 7.05E-01     | -1.25       | 1.22E-03       | 1.884       | 9.70E-01       | 1.079       |
| ACTN4      | actinin, alpha 4                                               | 3.46E-01     | 1.264       | 9.40E-01     | 1.023       | 3.67E-04       | 2.025       | 5.14E-01       | 1.04        |
| FLNB       | filamin B, beta                                                | 1.24E-01     | 1.607       | 6.49E-01     | 1.104       | 3.33E-02       | 1.281       | 1.84E-01       | -3.752      |
| ILKAP      | integrin-linked kinase-associated serine/threonine phosphatase | 1.00E+00     | -1          | 1.00E+00     | -1.49       | 4.27E-02       | -1.589      | 2.27E-01       | -1.253      |
| ITGB4      | integrin, beta 4                                               | 5.06E-01     | -1.18       | 7.55E-01     | -1.092      | 3.98E-02       | -1.164      | 1.00E+00       | -1.292      |
| MYL6       | myosin, light chain 6, alkali, smooth muscle and non-muscle    | 5.11E-02     | 1.436       | 4.10E-01     | 1.254       | 1.40E-02       | 1.973       | 9.73E-03       | 1.755       |
| MYL9       | myosin, light chain 9, regulatory                              | 1.00E+00     | 0           | 1.00E+00     | 0           | 4.54E-02       | 3.181       | 1.00E+00       | -1.094      |
| RHOT1      | ras homolog family member T1                                   | 1.00E+00     | 1.452       | 1.00E+00     | -1.341      | 4.97E-02       | 2.05        | 6.21E-01       | 1.195       |
| RPS6KA4    | ribosomal protein S6 kinase, 90kDa, polypeptide 4              | 1.00E+00     | -1.026      | 1.00E+00     | -1.418      | 2.13E-02       | -1.624      | 1.13E-01       | -1.257      |
| TMSB10/TMS | thymosin beta 10                                               | 2.63E-01     | 3.37        | 2.81E-01     | 1.836       | 3.77E-02       | 5.288       | 7.55E-01       | -1.269      |
| VIM        | vimentin                                                       | 9.23E-01     | -1.058      | 7.32E-01     | -1.226      | 9.94E-04       | -1.74       | 2.98E-02       | -1.433      |

**LMP2-with Inhibitors: ILK signaling (P = 0.2916)**

| Symbol  | Entrez Gene Name                                                     | LMP1 no Inhs |             | LMP2 no Inhs |             | LMP1 with Inhs |             | LMP2 with Inhs |             |
|---------|----------------------------------------------------------------------|--------------|-------------|--------------|-------------|----------------|-------------|----------------|-------------|
|         |                                                                      | p-value      | Fold Change | p-value      | Fold Change | p-value        | Fold Change | p-value        | Fold Change |
| MYL6    | myosin, light chain 6, alkali, smooth muscle and non-muscle          | 5.11E-02     | 1.436       | 4.10E-01     | 1.254       | 1.40E-02       | 1.973       | 9.73E-03       | 1.755       |
| NFKB1   | nuclear factor of kappa light polypeptide gene enhancer in B-cells 1 | 7.54E-01     | -1.28       | 8.35E-01     | 1.177       | 9.42E-02       | 1.205       | 1.63E-02       | 1.226       |
| PPP2R2A | protein phosphatase 2, regulatory subunit B, alpha                   | 4.81E-01     | 1.459       | 8.73E-01     | 1.147       | 2.85E-01       | -1.232      | 7.48E-03       | -1.358      |
| PXN     | paxillin                                                             | 2.26E-01     | 1.287       | 1.27E-01     | -1.543      | 3.24E-01       | 1.546       | 1.68E-02       | -1.271      |
| VIM     | vimentin                                                             | 9.23E-01     | -1.058      | 7.32E-01     | -1.226      | 9.94E-04       | -1.74       | 2.98E-02       | -1.433      |

**LMP1-no Inhibitors: Rac Signaling (P = 0.461)**

| Symbol | Entrez Gene Name                                    | LMP1 no Inhs |             | LMP2 no Inhs |             | LMP1 with Inhs |             | LMP2 with Inhs |             |
|--------|-----------------------------------------------------|--------------|-------------|--------------|-------------|----------------|-------------|----------------|-------------|
|        |                                                     | p-value      | Fold Change | p-value      | Fold Change | p-value        | Fold Change | p-value        | Fold Change |
| ARPC4  | actin related protein 2/3 complex, subunit 4, 20kDa | 1.11E-02     | -1.511      | 9.32E-01     | -1.010      | 5.30E-01       | -1.042      | 2.83E-01       | 1.177       |

**LMP2-no Inhibitors: Rac Signaling (P = 0.212)**

| Symbol | Entrez Gene Name          | LMP1 no Inhs |             | LMP2 no Inhs |             | LMP1 with Inhs |             | LMP2 with Inhs |             |
|--------|---------------------------|--------------|-------------|--------------|-------------|----------------|-------------|----------------|-------------|
|        |                           | p-value      | Fold Change | p-value      | Fold Change | p-value        | Fold Change | p-value        | Fold Change |
| BAIAP2 | BAI1-associated protein 2 | 9.89E-01     | -1.006      | 3.81E-02     | -1.488      | 1.71E-01       | 1.399       | 7.03E-01       | -1.090      |

**LMP1-with Inhibitors: Rac Signaling (P = 0.026)**

| Symbol | Entrez Gene Name                                            | LMP1 no Inhs |             | LMP2 no Inhs |             | LMP1 with Inhs |             | LMP2 with Inhs |             |
|--------|-------------------------------------------------------------|--------------|-------------|--------------|-------------|----------------|-------------|----------------|-------------|
|        |                                                             | p-value      | Fold Change | p-value      | Fold Change | p-value        | Fold Change | p-value        | Fold Change |
| ARPC1A | actin related protein 2/3 complex, subunit 1A, 41kDa        | 3.33E-01     | 1.922       | 7.89E-01     | 1.212       | 3.81E-02       | 1.382       | 2.37E-01       | -1.175      |
| CD44   | CD44 molecule (Indian blood group)                          | 4.40E-01     | -2.277      | 1.34E-01     | -3.127      | 5.16E-03       | -1.316      | 4.93E-01       | -1.089      |
| CYFIP2 | cytoplasmic FMR1 interacting protein 2                      |              |             |              |             | 4.71E-02       | -1.275      | 1.42E-01       | -3.469      |
| IQGAP3 | IQ motif containing GTPase activating protein 3             | 1.00E00      | 0.000       | 1.00E00      | 0.000       | 8.66E-03       | 2.330       | 3.17E-01       | -1.120      |
| ITGA5  | integrin, alpha 5 (fibronectin receptor, alpha polypeptide) | 3.64E-01     | -2.172      | 1.00E00      | -3.726      | 4.33E-02       | -2.098      | 2.27E-02       | -2.119      |
| MAP2K2 | mitogen-activated protein kinase kinase 2                   | 1.00E00      | -1.030      | 1.00E00      | 1.079       | 2.57E-02       | -1.397      | 2.02E-02       | -1.306      |
| PAK1   | p21 protein (Cdc42/Rac)-activated kinase 1                  |              |             |              |             | 3.34E-02       | -1.594      | 1.00E00        |             |

**LMP2-with Inhibitors: Rac Signaling (P = 0.0045)**

| Symbol  | Entrez Gene Name                                                     | LMP1 no Inhs |             | LMP2 no Inhs |             | LMP1 with Inhs |             | LMP2 with Inhs |             |
|---------|----------------------------------------------------------------------|--------------|-------------|--------------|-------------|----------------|-------------|----------------|-------------|
|         |                                                                      | p-value      | Fold Change | p-value      | Fold Change | p-value        | Fold Change | p-value        | Fold Change |
| ACTR2   | ARP2 actin-related protein 2 homolog (yeast)                         | 3.55E-01     | 1.594       | 9.05E-01     | -1.028      | 8.73E-01       | -1.010      | 4.13E-02       | -1.124      |
| BRK1    | BRICK1, SCAR/WAVE actin-nucleating complex subunit                   | 1.00E00      | 1.672       | 1.00E00      | 0.000       | 4.45E-01       | 1.045       | 2.15E-02       | -1.382      |
| ITGA5   | integrin, alpha 5 (fibronectin receptor, alpha polypeptide)          | 3.64E-01     | -2.172      | 1.00E00      | -3.726      | 4.33E-02       | -2.098      | 2.27E-02       | -2.119      |
| MAP2K2  | mitogen-activated protein kinase kinase 2                            | 1.00E00      | -1.030      | 1.00E00      | 1.079       | 2.57E-02       | -1.397      | 2.02E-02       | -1.306      |
| NCKAP1  | NCK-associated protein 1                                             | 5.12E-01     | 1.397       | 1.00E00      | 1.192       | 1.94E-01       | -1.207      | 1.15E-02       | -1.502      |
| NFKB1   | nuclear factor of kappa light polypeptide gene enhancer in B-cells 1 | 7.54E-01     | -1.280      | 8.35E-01     | 1.177       | 9.42E-02       | 1.205       | 1.63E-02       | 1.226       |
| RPS6KB1 | ribosomal protein S6 kinase, 70kDa, polypeptide 1                    | 1.00E00      | 1.861       | 1.00E00      | 1.983       | 1.04E-01       | -1.675      | 3.62E-02       | -1.878      |

**LMP1-no Inhibitors: Leukocyte Extravasation Signaling (P = 0.328)**

| Symbol | Entrez Gene Name                     | LMP1 no Inhs |             | LMP2 no Inhs |             | LMP1 with Inhs |             | LMP2 with Inhs |             |
|--------|--------------------------------------|--------------|-------------|--------------|-------------|----------------|-------------|----------------|-------------|
|        |                                      | p-value      | Fold Change | p-value      | Fold Change | p-value        | Fold Change | p-value        | Fold Change |
| RAP1B  | RAP1B, member of RAS oncogene family | 3.17E-02     | -3.786      | 1.00E00      | -3.401      | 8.56E-01       | 1.071       | 9.80E-01       | 1.010       |
| VCL    | vinculin                             | 4.67E-02     | 1.468       | 9.93E-01     | -1.001      | 9.62E-02       | -1.607      | 1.00E00        | -1.583      |

**LMP2-no Inhibitors: Leukocyte Extravasation Signaling (P = 1)**

None

**LMP1-with Inhibitors: Leukocyte Extravasation Signaling (P = 0.00045)**

| Symbol | Entrez Gene Name                                                                        | LMP1 no Inhs |             | LMP2 no Inhs |             | LMP1 with Inhs |             | LMP2 with Inhs |             |
|--------|-----------------------------------------------------------------------------------------|--------------|-------------|--------------|-------------|----------------|-------------|----------------|-------------|
|        |                                                                                         | p-value      | Fold Change | p-value      | Fold Change | p-value        | Fold Change | p-value        | Fold Change |
| ACTG1  | actin, gamma 1                                                                          | 4.38E-01     | 2.212       | 9.31E-01     | 1.090       | 6.29E-03       | 1.182       | 1.00E00        | -1.548      |
| ACTN1  | actinin, alpha 1                                                                        | 2.46E-01     | 1.725       | 7.05E-01     | -1.250      | 1.22E-03       | 1.884       | 9.70E-01       | 1.079       |
| ACTN4  | actinin, alpha 4                                                                        | 3.46E-01     | 1.264       | 9.40E-01     | 1.023       | 3.67E-04       | 2.025       | 5.14E-01       | 1.040       |
| CD44   | CD44 molecule (Indian blood group)                                                      | 4.40E-01     | -2.277      | 1.34E-01     | -3.127      | 5.16E-03       | -1.316      | 4.93E-01       | -1.089      |
| CD99   | CD99 molecule                                                                           | 1.00E00      | 0.000       | 1.00E00      | 0.000       | 1.94E-02       | 2.356       | 2.42E-01       | 1.329       |
| CRKL   | v-crk avian sarcoma virus CT10 oncogene homolog-like                                    | 7.18E-01     | 1.127       | 9.97E-01     | 1.001       | 3.25E-02       | 2.215       | 7.70E-01       | 1.132       |
| EZR    | ezrin                                                                                   | 4.70E-01     | 1.533       | 6.72E-01     | 1.354       | 3.55E-02       | 2.326       | 9.76E-01       | -1.012      |
| ICAM1  | intercellular adhesion molecule 1                                                       | 1.00E00      | 1.102       | 1.00E00      | 0.000       | 1.20E-02       | 4.093       | 4.97E-01       | -1.175      |
| ITGA5  | integrin, alpha 5 (fibronectin receptor, alpha polypeptide)                             | 3.64E-01     | -2.172      | 1.00E00      | -3.726      | 4.33E-02       | -2.098      | 2.27E-02       | -2.119      |
| MAP2K2 | mitogen-activated protein kinase kinase 2                                               | 1.00E00      | -1.030      | 1.00E00      | 1.079       | 2.57E-02       | -1.397      | 2.02E-02       | -1.306      |
| MLLT4  | myeloid/lymphoid or mixed-lineage leukemia (trithorax homolog, Drosophila); translocat  | 9.93E-01     | 1.006       | 8.64E-01     | 1.126       | 5.67E-03       | 1.452       | 4.75E-01       | 1.126       |
| MYL6   | myosin, light chain 6, alkali, smooth muscle and non-muscle                             | 5.11E-02     | 1.436       | 4.10E-01     | 1.254       | 1.40E-02       | 1.973       | 9.73E-03       | 1.755       |
| RAC2   | ras-related C3 botulinum toxin substrate 2 (rho family, small GTP binding protein Rac2) | 1.00E00      | 0.000       | 1.00E00      | 0.000       | 1.04E-03       | 1.399       | 7.67E-02       | -1.210      |
| TIMP1  | TIMP metalloproteinase inhibitor 1                                                      | 8.12E-01     | 1.079       | 1.00E00      | -1.174      | 1.98E-02       | 1.741       | 9.21E-01       | 1.008       |
| TIMP3  | TIMP metalloproteinase inhibitor 3                                                      | 1.00E00      | -2.697      | 1.00E00      | 0.000       | 4.13E-03       | -1.852      | 4.38E-01       | -1.628      |

**LMP2-with Inhibitors: Leukocyte Extravasation Signaling (P = 0.352)**

| Symbol | Entrez Gene Name                                                                        | LMP1 no Inhs |             | LMP2 no Inhs |             | LMP1 with Inhs |             | LMP2 with Inhs |             |
|--------|-----------------------------------------------------------------------------------------|--------------|-------------|--------------|-------------|----------------|-------------|----------------|-------------|
|        |                                                                                         | p-value      | Fold Change | p-value      | Fold Change | p-value        | Fold Change | p-value        | Fold Change |
| GNAI3  | guanine nucleotide binding protein (G protein), alpha inhibiting activity polypeptide 3 | 9.21E-01     | -1.135      | 1.00E00      | 2.354       | 2.38E-01       | -1.140      | 3.91E-03       | -1.355      |
| ITGA5  | integrin, alpha 5 (fibronectin receptor, alpha polypeptide)                             | 3.64E-01     | -2.172      | 1.00E00      | -3.726      | 4.33E-02       | -2.098      | 2.27E-02       | -2.119      |
| MAP2K2 | mitogen-activated protein kinase kinase 2                                               | 1.00E00      | -1.030      | 1.00E00      | 1.079       | 2.57E-02       | -1.397      | 2.02E-02       | -1.306      |
| MYL6   | myosin, light chain 6, alkali, smooth muscle and non-muscle                             | 5.11E-02     | 1.436       | 4.10E-01     | 1.254       | 1.40E-02       | 1.973       | 9.73E-03       | 1.755       |
| PXN    | paxillin                                                                                | 2.26E-01     | 1.287       | 1.27E-01     | -1.543      | 3.24E-01       | 1.546       | 1.68E-02       | -1.271      |

**LMP1-no Inhibitors: Signaling by RhoFamily GTPases (P = 1)**

| Symbol | Entrez Gene Name                                    | LMP1 no Inhs |             | LMP2 no Inhs |             | LMP1 with Inhs |             | LMP2 with Inhs |             |
|--------|-----------------------------------------------------|--------------|-------------|--------------|-------------|----------------|-------------|----------------|-------------|
|        |                                                     | p-value      | Fold Change | p-value      | Fold Change | p-value        | Fold Change | p-value        | Fold Change |
| ARPC4  | actin related protein 2/3 complex, subunit 4, 20kDa | 1.11E-02     | -1.511      | 9.32E-01     | -1.01       | 5.30E-01       | -1.042      | 2.83E-01       | 1.177       |

**LMP2-no Inhibitors: Signaling by RhoFamily GTPases (P = 0.409)**

| Symbol | Entrez Gene Name          | LMP1 no Inhs |             | LMP2 no Inhs |             | LMP1 with Inhs |             | LMP2 with Inhs |             |
|--------|---------------------------|--------------|-------------|--------------|-------------|----------------|-------------|----------------|-------------|
|        |                           | p-value      | Fold Change | p-value      | Fold Change | p-value        | Fold Change | p-value        | Fold Change |
| BAIAP2 | BAI1-associated protein 2 | 9.89E-01     | -1.006      | 3.81E-02     | -1.488      | 1.71E-01       | 1.399       | 7.03E-01       | -1.09       |

**LMP1-with Inhibitors: Signaling by RhoFamily GTPases (P = 0.0051)**

| Symbol   | Entrez Gene Name                                            | LMP1 no Inhs |             | LMP2 no Inhs |             | LMP1 with Inhs |             | LMP2 with Inhs |             |
|----------|-------------------------------------------------------------|--------------|-------------|--------------|-------------|----------------|-------------|----------------|-------------|
|          |                                                             | p-value      | Fold Change | p-value      | Fold Change | p-value        | Fold Change | p-value        | Fold Change |
| ACTG1    | actin, gamma 1                                              | 4.38E-01     | 2.212       | 9.31E-01     | 1.09        | 6.29E-03       | 1.182       | 1.00E+00       | -1.548      |
| ARHGEF11 | Rho guanine nucleotide exchange factor (GEF) 11             | 1.00E+00     | 0           | 1.00E+00     | 0           | 1.83E-02       | 1.612       | 6.07E-01       | -1.132      |
| ARPC1A   | actin related protein 2/3 complex, subunit 1A, 41kDa        | 3.33E-01     | 1.922       | 7.89E-01     | 1.212       | 3.81E-02       | 1.382       | 2.37E-01       | -1.175      |
| CDC42EP1 | CDC42 effector protein (Rho GTPase binding) 1               | 1.00E+00     | 0           | 1.00E+00     | 0           | 7.91E-04       | 3.842       | 1.48E-01       | -1.617      |
| CLIP1    | CAP-GLY domain containing linker protein 1                  | 7.27E-01     | 1.138       | 8.90E-02     | -2.449      | 4.59E-03       | 1.901       | 5.89E-01       | 1.072       |
| EZR      | ezrin                                                       | 4.70E-01     | 1.533       | 6.72E-01     | 1.354       | 3.55E-02       | 2.326       | 9.76E-01       | -1.012      |
| ITGA5    | integrin, alpha 5 (fibronectin receptor, alpha polypeptide) | 3.64E-01     | -2.172      | 1.00E+00     | -3.726      | 4.33E-02       | -2.098      | 2.27E-02       | -2.119      |
| MAP2K2   | mitogen-activated protein kinase kinase 2                   | 1.00E+00     | -1.03       | 1.00E+00     | 1.079       | 2.57E-02       | -1.397      | 2.02E-02       | -1.306      |
| MYL6     | myosin, light chain 6, alkali, smooth muscle and non-muscle | 5.11E-02     | 1.436       | 4.10E-01     | 1.254       | 1.40E-02       | 1.973       | 9.73E-03       | 1.755       |
| MYL9     | myosin, light chain 9, regulatory                           | 1.00E+00     | 0           | 1.00E+00     | 0           | 4.54E-02       | 3.181       | 1.00E+00       | -1.094      |
| PAK1     | p21 protein (Cdc42/Rac)-activated kinase 1                  |              |             |              |             | 3.34E-02       | -1.594      | 1.00E+00       |             |
| RHOT1    | ras homolog family member T1                                | 1.00E+00     | 1.452       | 1.00E+00     | -1.341      | 4.97E-02       | 2.05        | 6.21E-01       | 1.195       |
| SEPT8    | septin 8                                                    |              |             |              |             | 3.23E-02       | -1.242      | 1.28E-01       | -1.163      |
| VIM      | vimentin                                                    | 9.23E-01     | -1.058      | 7.32E-01     | -1.226      | 9.94E-04       | -1.74       | 2.98E-02       | -1.433      |

**LMP2-with Inhibitors: Signaling by RhoFamily GTPases (P = 0.168)**

| Symbol | Entrez Gene Name                                                                        | LMP1 no Inhs |             | LMP2 no Inhs |             | LMP1 with Inhs |             | LMP2 with Inhs |             |
|--------|-----------------------------------------------------------------------------------------|--------------|-------------|--------------|-------------|----------------|-------------|----------------|-------------|
|        |                                                                                         | p-value      | Fold Change | p-value      | Fold Change | p-value        | Fold Change | p-value        | Fold Change |
| ACTR2  | ARP2 actin-related protein 2 homolog (yeast)                                            | 3.55E-01     | 1.594       | 9.05E-01     | -1.028      | 8.73E-01       | -1.01       | 4.13E-02       | -1.124      |
| GNAI3  | guanine nucleotide binding protein (G protein), alpha inhibiting activity polypeptide 3 | 9.21E-01     | -1.135      | 1.00E+00     | 2.354       | 2.38E-01       | -1.14       | 3.91E-03       | -1.355      |
| ITGA5  | integrin, alpha 5 (fibronectin receptor, alpha polypeptide)                             | 3.64E-01     | -2.172      | 1.00E+00     | -3.726      | 4.33E-02       | -2.098      | 2.27E-02       | -2.119      |
| MAP2K2 | mitogen-activated protein kinase kinase 2                                               | 1.00E+00     | -1.03       | 1.00E+00     | 1.079       | 2.57E-02       | -1.397      | 2.02E-02       | -1.306      |
| MYL6   | myosin, light chain 6, alkali, smooth muscle and non-muscle                             | 5.11E-02     | 1.436       | 4.10E-01     | 1.254       | 1.40E-02       | 1.973       | 9.73E-03       | 1.755       |
| NFKB1  | nuclear factor of kappa light polypeptide gene enhancer in B-cells 1                    | 7.54E-01     | -1.28       | 8.35E-01     | 1.177       | 9.42E-02       | 1.205       | 1.63E-02       | 1.226       |
| VIM    | vimentin                                                                                | 9.23E-01     | -1.058      | 7.32E-01     | -1.226      | 9.94E-04       | -1.74       | 2.98E-02       | -1.433      |

| <b>LMP1-no Inhibitors: RhoA signaling (P = 0.512)</b> |                                                     | <b>LMP1 no Inhs</b> |                    | <b>LMP2 no Inhs</b> |                    | <b>LMP1 with Inhs</b> |                    | <b>LMP2 with Inhs</b> |                    |
|-------------------------------------------------------|-----------------------------------------------------|---------------------|--------------------|---------------------|--------------------|-----------------------|--------------------|-----------------------|--------------------|
| <b>Symbol</b>                                         | <b>Entrez Gene Name</b>                             | <b>p-value</b>      | <b>Fold Change</b> | <b>p-value</b>      | <b>Fold Change</b> | <b>p-value</b>        | <b>Fold Change</b> | <b>p-value</b>        | <b>Fold Change</b> |
| ARPC4                                                 | actin related protein 2/3 complex, subunit 4, 20kDa | 1.11E-02            | -1.511             | 9.32E-01            | -1.01              | 5.30E-01              | -1.042             | 2.83E-01              | 1.177              |

  

| <b>LMP2-no Inhibitors: RhoA signaling (P = 0.241)</b> |                           | <b>LMP1 no Inhs</b> |                    | <b>LMP2 no Inhs</b> |                    | <b>LMP1 with Inhs</b> |                    | <b>LMP2 with Inhs</b> |                    |
|-------------------------------------------------------|---------------------------|---------------------|--------------------|---------------------|--------------------|-----------------------|--------------------|-----------------------|--------------------|
| <b>Symbol</b>                                         | <b>Entrez Gene Name</b>   | <b>p-value</b>      | <b>Fold Change</b> | <b>p-value</b>      | <b>Fold Change</b> | <b>p-value</b>        | <b>Fold Change</b> | <b>p-value</b>        | <b>Fold Change</b> |
| BAIAP2                                                | BAI1-associated protein 2 | 9.89E-01            | -1.006             | 3.81E-02            | -1.488             | 1.71E-01              | 1.399              | 7.03E-01              | -1.09              |

  

| <b>LMP1-with Inhibitors: RhoA signaling (P = 0.0065)</b> |                                                             | <b>LMP1 no Inhs</b> |                    | <b>LMP2 no Inhs</b> |                    | <b>LMP1 with Inhs</b> |                    | <b>LMP2 with Inhs</b> |                    |
|----------------------------------------------------------|-------------------------------------------------------------|---------------------|--------------------|---------------------|--------------------|-----------------------|--------------------|-----------------------|--------------------|
| <b>Symbol</b>                                            | <b>Entrez Gene Name</b>                                     | <b>p-value</b>      | <b>Fold Change</b> | <b>p-value</b>      | <b>Fold Change</b> | <b>p-value</b>        | <b>Fold Change</b> | <b>p-value</b>        | <b>Fold Change</b> |
| ACTG1                                                    | actin, gamma 1                                              | 4.38E-01            | 2.212              | 9.31E-01            | 1.09               | 6.29E-03              | 1.182              | 1.00E+00              | -1.548             |
| ARHGEF11                                                 | Rho guanine nucleotide exchange factor (GEF) 11             | 1.00E+00            | 0                  | 1.00E+00            | 0                  | 1.83E-02              | 1.612              | 6.07E-01              | -1.132             |
| ARPC1A                                                   | actin related protein 2/3 complex, subunit 1A, 41kDa        | 3.33E-01            | 1.922              | 7.89E-01            | 1.212              | 3.81E-02              | 1.382              | 2.37E-01              | -1.175             |
| CDC42EP1                                                 | CDC42 effector protein (Rho GTPase binding) 1               | 1.00E+00            | 0                  | 1.00E+00            | 0                  | 7.91E-04              | 3.842              | 1.48E-01              | -1.617             |
| EZR                                                      | ezrin                                                       | 4.70E-01            | 1.533              | 6.72E-01            | 1.354              | 3.55E-02              | 2.326              | 9.76E-01              | -1.012             |
| MYL6                                                     | myosin, light chain 6, alkali, smooth muscle and non-muscle | 5.11E-02            | 1.436              | 4.10E-01            | 1.254              | 1.40E-02              | 1.973              | 9.73E-03              | 1.755              |
| MYL9                                                     | myosin, light chain 9, regulatory                           | 1.00E+00            | 0                  | 1.00E+00            | 0                  | 4.54E-02              | 3.181              | 1.00E+00              | -1.094             |
| SEPT8                                                    | septin 8                                                    |                     |                    |                     |                    | 3.23E-02              | -1.242             | 1.28E-01              | -1.163             |
| TTN                                                      | titin                                                       | 1.00E+00            | 0                  | 1.00E+00            | 0                  | 1.49E-02              | 1.477              | 7.70E-02              | 1.501              |

  

| <b>LMP2-with Inhibitors: RhoA signaling (P = 1)</b> |                                                             | <b>LMP1 no Inhs</b> |                    | <b>LMP2 no Inhs</b> |                    | <b>LMP1 with Inhs</b> |                    | <b>LMP2 with Inhs</b> |                    |
|-----------------------------------------------------|-------------------------------------------------------------|---------------------|--------------------|---------------------|--------------------|-----------------------|--------------------|-----------------------|--------------------|
| <b>Symbol</b>                                       | <b>Entrez Gene Name</b>                                     | <b>p-value</b>      | <b>Fold Change</b> | <b>p-value</b>      | <b>Fold Change</b> | <b>p-value</b>        | <b>Fold Change</b> | <b>p-value</b>        | <b>Fold Change</b> |
| ACTR2                                               | ARP2 actin-related protein 2 homolog (yeast)                | 3.55E-01            | 1.594              | 9.05E-01            | -1.028             | 8.73E-01              | -1.01              | 4.13E-02              | -1.124             |
| MYL6                                                | myosin, light chain 6, alkali, smooth muscle and non-muscle | 5.11E-02            | 1.436              | 4.10E-01            | 1.254              | 1.40E-02              | 1.973              | 9.73E-03              | 1.755              |

**LMP1-no Inhibitors: Cell Movement of tumor Cells (P = 1)**

None

**LMP2-no Inhibitors: Cell Movement of tumor Cells (P = 1)**

None

**LMP1-with Inhibitors: Cell Movement of tumor Cells (P = 0.0016)**

| Symbol | Entrez Gene Name                                       | LMP1 no Inhs |             | LMP2 no Inhs |             | LMP1 with Inhs |             | LMP2 with Inhs |             |
|--------|--------------------------------------------------------|--------------|-------------|--------------|-------------|----------------|-------------|----------------|-------------|
|        |                                                        | p-value      | Fold Change | p-value      | Fold Change | p-value        | Fold Change | p-value        | Fold Change |
| CD44   | CD44 molecule (Indian blood group)                     | 4.40E-01     | -2.277      | 1.34E-01     | -3.127      | 5.16E-03       | -1.316      | 4.93E-01       | -1.089      |
| CD97   | CD97 molecule                                          | 1.00E00      | 0.000       | 1.00E00      | 0.000       | 4.05E-02       | 1.752       | 2.20E-01       | -1.646      |
| CTSB   | cathepsin B                                            | 9.68E-02     | 1.528       | 9.13E-01     | 1.055       | 1.55E-02       | 1.920       | 1.58E-01       | 1.368       |
| EZR    | ezrin                                                  | 4.70E-01     | 1.533       | 6.72E-01     | 1.354       | 3.55E-02       | 2.326       | 9.76E-01       | -1.012      |
| F3     | coagulation factor III (thromboplastin, tissue factor) | 1.00E00      | 2.169       | 1.00E00      | 0.000       | 4.20E-03       | 4.412       | 3.68E-01       | 1.350       |
| GSN    | gelsolin                                               | 4.22E-01     | 1.945       | 1.00E00      | -1.706      | 2.18E-03       | 1.703       | 1.23E-01       | -1.197      |
| LAMA5  | laminin, alpha 5                                       | 2.69E-01     | -2.706      | 1.00E00      | -3.277      | 1.45E-02       | -1.401      | 4.71E-02       | -2.294      |
| LGALS3 | lectin, galactoside-binding, soluble, 3                | 2.19E-01     | 1.602       | 5.08E-01     | -1.695      | 1.83E-02       | 2.188       | 6.11E-01       | 1.139       |
| MET    | MET proto-oncogene, receptor tyrosine kinase           | 1.00E00      | 0.000       | 1.00E00      | 0.000       | 4.99E-02       | -1.277      | 6.91E-01       | 1.046       |
| PAK1   | p21 protein (Cdc42/Rac)-activated kinase 1             |              |             |              |             | 3.34E-02       | -1.594      | 1.00E00        |             |
| S100A2 | S100 calcium binding protein A2                        | 6.15E-01     | 1.327       | 2.43E-02     | 2.805       | 1.50E-03       | -2.333      | 3.34E-01       | -2.009      |
| S100P  | S100 calcium binding protein P                         | 1.00E00      | 0.000       | 1.00E00      | 0.000       | 1.45E-02       | 61.983      | 5.04E-01       | 2.709       |
| SLPI   | secretory leukocyte peptidase inhibitor                |              |             |              |             | 1.03E-02       | 9.998       | 3.86E-01       | 1.397       |
| VIM    | vimentin                                               | 9.23E-01     | -1.058      | 7.32E-01     | -1.226      | 9.94E-04       | -1.740      | 2.98E-02       | -1.433      |

**LMP2-with Inhibitors: Cell Movement of tumor Cells (P = 1)**

None

**LMP1-no Inhibitors: Regulation of Actin-based motility by Rho (P = 0.41)**

| Symbol | Entrez Gene Name                                    | LMP1 no Inhs |             | LMP2 no Inhs |             | LMP1 with Inhs |             | LMP2 with Inhs |             |
|--------|-----------------------------------------------------|--------------|-------------|--------------|-------------|----------------|-------------|----------------|-------------|
|        |                                                     | p-value      | Fold Change | p-value      | Fold Change | p-value        | Fold Change | p-value        | Fold Change |
| ARPC4  | actin related protein 2/3 complex, subunit 4, 20kDa | 1.11E-02     | -1.511      | 9.32E-01     | -1.01       | 5.30E-01       | -1.042      | 2.83E-01       | 1.177       |

**LMP2-no Inhibitors: Regulation of Actin-based motility by Rho (P = 0.19)**

| Symbol | Entrez Gene Name          | LMP1 no Inhs |             | LMP2 no Inhs |             | LMP1 with Inhs |             | LMP2 with Inhs |             |
|--------|---------------------------|--------------|-------------|--------------|-------------|----------------|-------------|----------------|-------------|
|        |                           | p-value      | Fold Change | p-value      | Fold Change | p-value        | Fold Change | p-value        | Fold Change |
| BAIAP2 | BAI1-associated protein 2 | 9.89E-01     | -1.006      | 3.81E-02     | -1.488      | 1.71E-01       | 1.399       | 7.03E-01       | -1.09       |

**LMP1-with Inhibitors: Regulation of Actin-based motility by Rho (P = 0.0037)**

| Symbol | Entrez Gene Name                                                                        | LMP1 no Inhs |             | LMP2 no Inhs |             | LMP1 with Inhs |             | LMP2 with Inhs |             |
|--------|-----------------------------------------------------------------------------------------|--------------|-------------|--------------|-------------|----------------|-------------|----------------|-------------|
|        |                                                                                         | p-value      | Fold Change | p-value      | Fold Change | p-value        | Fold Change | p-value        | Fold Change |
| ARPC1A | actin related protein 2/3 complex, subunit 1A, 41kDa                                    | 3.33E-01     | 1.922       | 7.89E-01     | 1.212       | 3.81E-02       | 1.382       | 2.37E-01       | -1.175      |
| GSN    | gelsolin                                                                                | 4.22E-01     | 1.945       | 1.00E+00     | -1.706      | 2.18E-03       | 1.703       | 1.23E-01       | -1.197      |
| ITGA5  | integrin, alpha 5 (fibronectin receptor, alpha polypeptide)                             | 3.64E-01     | -2.172      | 1.00E+00     | -3.726      | 4.33E-02       | -2.098      | 2.27E-02       | -2.119      |
| MYL6   | myosin, light chain 6, alkali, smooth muscle and non-muscle                             | 5.11E-02     | 1.436       | 4.10E-01     | 1.254       | 1.40E-02       | 1.973       | 9.73E-03       | 1.755       |
| MYL9   | myosin, light chain 9, regulatory                                                       | 1.00E+00     | 0           | 1.00E+00     | 0           | 4.54E-02       | 3.181       | 1.00E+00       | -1.094      |
| PAK1   | p21 protein (Cdc42/Rac)-activated kinase 1                                              |              |             |              |             | 3.34E-02       | -1.594      | 1.00E+00       |             |
| RAC2   | ras-related C3 botulinum toxin substrate 2 (rho family, small GTP binding protein Rac2) | 1.00E+00     | 0           | 1.00E+00     | 0           | 1.04E-03       | 1.399       | 7.67E-02       | -1.21       |
| RHOT1  | ras homolog family member T1                                                            | 1.00E+00     | 1.452       | 1.00E+00     | -1.341      | 4.97E-02       | 2.05        | 6.21E-01       | 1.195       |

**LMP2-with Inhibitors: Regulation of Actin-based motility by Rho (P = 0.263)**

| Symbol | Entrez Gene Name                                            | LMP1 no Inhs |             | LMP2 no Inhs |             | LMP1 with Inhs |             | LMP2 with Inhs |             |
|--------|-------------------------------------------------------------|--------------|-------------|--------------|-------------|----------------|-------------|----------------|-------------|
|        |                                                             | p-value      | Fold Change | p-value      | Fold Change | p-value        | Fold Change | p-value        | Fold Change |
| ACTR2  | ARP2 actin-related protein 2 homolog (yeast)                | 3.55E-01     | 1.594       | 9.05E-01     | -1.028      | 8.73E-01       | -1.01       | 4.13E-02       | -1.124      |
| ITGA5  | integrin, alpha 5 (fibronectin receptor, alpha polypeptide) | 3.64E-01     | -2.172      | 1.00E+00     | -3.726      | 4.33E-02       | -2.098      | 2.27E-02       | -2.119      |
| MYL6   | myosin, light chain 6, alkali, smooth muscle and non-muscle | 5.11E-02     | 1.436       | 4.10E-01     | 1.254       | 1.40E-02       | 1.973       | 9.73E-03       | 1.755       |



| <b>LMP1-no Inhibitors: Actin cytoskeleton (P = 0.135)</b> |                                                     | <b>LMP1 no Inhs</b> |                    | <b>LMP2 no Inhs</b> |                    | <b>LMP1 with Inhs</b> |                    | <b>LMP2 with Inhs</b> |                    |
|-----------------------------------------------------------|-----------------------------------------------------|---------------------|--------------------|---------------------|--------------------|-----------------------|--------------------|-----------------------|--------------------|
| <b>Symbol</b>                                             | <b>Entrez Gene Name</b>                             | <b>p-value</b>      | <b>Fold Change</b> | <b>p-value</b>      | <b>Fold Change</b> | <b>p-value</b>        | <b>Fold Change</b> | <b>p-value</b>        | <b>Fold Change</b> |
| ARPC4                                                     | actin related protein 2/3 complex, subunit 4, 20kDa | 1.11E-02            | -1.511             | 9.32E-01            | -1.010             | 5.30E-01              | -1.042             | 2.83E-01              | 1.177              |
| CSK                                                       | c-src tyrosine kinase                               | 5.95E-03            | -1.902             | 3.88E-01            | -1.572             | 1.36E-02              | 1.380              | 1.62E-01              | -1.099             |
| VCL                                                       | vinculin                                            | 4.67E-02            | 1.468              | 9.93E-01            | -1.001             | 9.62E-02              | -1.607             | 1.00E00               | -1.583             |

| <b>LMP2-no Inhibitors: Actin cytoskeleton (P = 0.389)</b> |                           | <b>LMP1 no Inhs</b> |                    | <b>LMP2 no Inhs</b> |                    | <b>LMP1 with Inhs</b> |                    | <b>LMP2 with Inhs</b> |                    |
|-----------------------------------------------------------|---------------------------|---------------------|--------------------|---------------------|--------------------|-----------------------|--------------------|-----------------------|--------------------|
| <b>Symbol</b>                                             | <b>Entrez Gene Name</b>   | <b>p-value</b>      | <b>Fold Change</b> | <b>p-value</b>      | <b>Fold Change</b> | <b>p-value</b>        | <b>Fold Change</b> | <b>p-value</b>        | <b>Fold Change</b> |
| BAIAP2                                                    | BAI1-associated protein 2 | 9.89E-01            | -1.006             | 3.81E-02            | -1.488             | 1.71E-01              | 1.399              | 7.03E-01              | -1.090             |

| <b>LMP1-with Inhibitors: Actin cytoskeleton (P = 9.58 x 10<sup>-6</sup>)</b> |                                                                                | <b>LMP1 no Inhs</b> |                    | <b>LMP2 no Inhs</b> |                    | <b>LMP1 with Inhs</b> |                    | <b>LMP2 with Inhs</b> |                    |
|------------------------------------------------------------------------------|--------------------------------------------------------------------------------|---------------------|--------------------|---------------------|--------------------|-----------------------|--------------------|-----------------------|--------------------|
| <b>Symbol</b>                                                                | <b>Entrez Gene Name</b>                                                        | <b>p-value</b>      | <b>Fold Change</b> | <b>p-value</b>      | <b>Fold Change</b> | <b>p-value</b>        | <b>Fold Change</b> | <b>p-value</b>        | <b>Fold Change</b> |
| ACTG1                                                                        | actin, gamma 1                                                                 | 4.38E-01            | 2.212              | 9.31E-01            | 1.090              | 6.29E-03              | 1.182              | 1.00E00               | -1.548             |
| ACTN1                                                                        | actinin, alpha 1                                                               | 2.46E-01            | 1.725              | 7.05E-01            | -1.250             | 1.22E-03              | 1.884              | 9.70E-01              | 1.079              |
| ACTN4                                                                        | actinin, alpha 4                                                               | 3.46E-01            | 1.264              | 9.40E-01            | 1.023              | 3.67E-04              | 2.025              | 5.14E-01              | 1.040              |
| ARPC1A                                                                       | actin related protein 2/3 complex, subunit 1A, 41kDa                           | 3.33E-01            | 1.922              | 7.89E-01            | 1.212              | 3.81E-02              | 1.382              | 2.37E-01              | -1.175             |
| CRKL                                                                         | v-crk avian sarcoma virus CT10 oncogene homolog-like                           | 7.18E-01            | 1.127              | 9.97E-01            | 1.001              | 3.25E-02              | 2.215              | 7.70E-01              | 1.132              |
| CSK                                                                          | c-src tyrosine kinase                                                          | 5.95E-03            | -1.902             | 3.88E-01            | -1.572             | 1.36E-02              | 1.380              | 1.62E-01              | -1.099             |
| CYFIP2                                                                       | cytoplasmic FMR1 interacting protein 2                                         |                     |                    |                     |                    | 4.71E-02              | -1.275             | 1.42E-01              | -3.469             |
| EZR                                                                          | ezrin                                                                          | 4.70E-01            | 1.533              | 6.72E-01            | 1.354              | 3.55E-02              | 2.326              | 9.76E-01              | -1.012             |
| FGD1                                                                         | FYVE, RhoGEF and PH domain containing 1                                        | 1.00E00             | 0.000              | 1.00E00             | 0.000              | 1.73E-02              | 1.362              | 1.00E00               | -1.038             |
| GSN                                                                          | gelsolin                                                                       | 4.22E-01            | 1.945              | 1.00E00             | -1.706             | 2.18E-03              | 1.703              | 1.23E-01              | -1.197             |
| IQGAP3                                                                       | IQ motif containing GTPase activating protein 3                                | 1.00E00             | 0.000              | 1.00E00             | 0.000              | 8.66E-03              | 2.330              | 3.17E-01              | -1.120             |
| ITGA5                                                                        | integrin, alpha 5 (fibronectin receptor, alpha polypeptide)                    | 3.64E-01            | -2.172             | 1.00E00             | -3.726             | 4.33E-02              | -2.098             | 2.27E-02              | -2.119             |
| MAP2K2                                                                       | mitogen-activated protein kinase kinase 2                                      | 1.00E00             | -1.030             | 1.00E00             | 1.079              | 2.57E-02              | -1.397             | 2.02E-02              | -1.306             |
| MYL6                                                                         | myosin, light chain 6, alkali, smooth muscle and non-muscle                    | 5.11E-02            | 1.436              | 4.10E-01            | 1.254              | 1.40E-02              | 1.973              | 9.73E-03              | 1.755              |
| MYL9                                                                         | myosin, light chain 9, regulatory                                              | 1.00E00             | 0.000              | 1.00E00             | 0.000              | 4.54E-02              | 3.181              | 1.00E00               | -1.094             |
| PAK1                                                                         | p21 protein (Cdc42/Rac)-activated kinase 1                                     |                     |                    |                     |                    | 3.34E-02              | -1.594             | 1.00E00               |                    |
| RAC2                                                                         | ras-related C3 botulinum toxin substrate 2 (rho family, small GTP binding prot | 1.00E00             | 0.000              | 1.00E00             | 0.000              | 1.04E-03              | 1.399              | 7.67E-02              | -1.210             |
| TMSB10/TI                                                                    | thymosin beta 10                                                               | 2.63E-01            | 3.370              | 2.81E-01            | 1.836              | 3.77E-02              | 5.288              | 7.55E-01              | -1.269             |
| TTN                                                                          | titin                                                                          | 1.00E00             | 0.000              | 1.00E00             | 0.000              | 1.49E-02              | 1.477              | 7.70E-02              | 1.501              |

| <b>LMP2-with Inhibitors: Actin cytoskeleton (P = 0.063)</b> |                                                             | <b>LMP1 no Inhs</b> |                    | <b>LMP2 no Inhs</b> |                    | <b>LMP1 with Inhs</b> |                    | <b>LMP2 with Inhs</b> |                    |
|-------------------------------------------------------------|-------------------------------------------------------------|---------------------|--------------------|---------------------|--------------------|-----------------------|--------------------|-----------------------|--------------------|
| <b>Symbol</b>                                               | <b>Entrez Gene Name</b>                                     | <b>p-value</b>      | <b>Fold Change</b> | <b>p-value</b>      | <b>Fold Change</b> | <b>p-value</b>        | <b>Fold Change</b> | <b>p-value</b>        | <b>Fold Change</b> |
| ACTR2                                                       | ARP2 actin-related protein 2 homolog (yeast)                | 3.55E-01            | 1.594              | 9.05E-01            | -1.028             | 8.73E-01              | -1.010             | 4.13E-02              | -1.124             |
| BRK1                                                        | BRICK1, SCAR/WAVE actin-nucleating complex subunit          | 1.00E00             | 1.672              | 1.00E00             | 0.000              | 4.45E-01              | 1.045              | 2.15E-02              | -1.382             |
| ITGA5                                                       | integrin, alpha 5 (fibronectin receptor, alpha polypeptide) | 3.64E-01            | -2.172             | 1.00E00             | -3.726             | 4.33E-02              | -2.098             | 2.27E-02              | -2.119             |
| MAP2K2                                                      | mitogen-activated protein kinase kinase 2                   | 1.00E00             | -1.030             | 1.00E00             | 1.079              | 2.57E-02              | -1.397             | 2.02E-02              | -1.306             |
| MYL6                                                        | myosin, light chain 6, alkali, smooth muscle and non-muscle | 5.11E-02            | 1.436              | 4.10E-01            | 1.254              | 1.40E-02              | 1.973              | 9.73E-03              | 1.755              |
| NCKAP1                                                      | NCK-associated protein 1                                    | 5.12E-01            | 1.397              | 1.00E00             | 1.192              | 1.94E-01              | -1.207             | 1.15E-02              | -1.502             |
| PXN                                                         | paxillin                                                    | 2.26E-01            | 1.287              | 1.27E-01            | -1.543             | 3.24E-01              | 1.546              | 1.68E-02              | -1.271             |
| TLN1                                                        | talain 1                                                    | 6.90E-01            | 1.081              | 1.64E-01            | -1.316             | 7.06E-02              | 1.063              | 2.74E-02              | -1.154             |

|        |                                  | LMP1 no Inhs |             | LMP2 no Inhs |             | LMP1 with Inhs |             | LMP2 with Inhs |             |
|--------|----------------------------------|--------------|-------------|--------------|-------------|----------------|-------------|----------------|-------------|
| Symbol | Entrez Gene Name                 | p-value      | Fold Change | p-value      | Fold Change | p-value        | Fold Change | p-value        | Fold Change |
| CGN    | cingulin                         | 1.00E+00     | 0           | 1.00E+00     | 0           | 1.41E-04       | 28.752      | 9.66E-01       | 1.025       |
| CSNK1D | casein kinase 1, delta           | 1.00E+00     | 0           | 1.00E+00     | 0           | 2.53E-02       | -1.754      | 4.94E-02       | -1.485      |
| FHL1   | four and a half LIM domains 1    |              |             |              |             | 2.10E-02       | -2.88       | 3.44E-02       | -1.783      |
| MAP2   | microtubule-associated protein 2 | 1.00E+00     | 0           | 1.00E+00     | 0           | 1.21E-03       | 14.588      | 1.00E+00       | 5.876       |
| VIM    | vimentin                         | 9.23E-01     | -1.058      | 7.32E-01     | -1.226      | 9.94E-04       | -1.74       | 2.98E-02       | -1.433      |

  

|        |                                 | LMP1 no Inhs |             | LMP2 no Inhs |             | LMP1 with Inhs |             | LMP2 with Inhs |             |
|--------|---------------------------------|--------------|-------------|--------------|-------------|----------------|-------------|----------------|-------------|
| Symbol | Entrez Gene Name                | p-value      | Fold Change | p-value      | Fold Change | p-value        | Fold Change | p-value        | Fold Change |
| CSNK1D | casein kinase 1, delta          | 1.00E+00     | 0           | 1.00E+00     | 0           | 2.53E-02       | -1.754      | 4.94E-02       | -1.485      |
| FAS    | Fas cell surface death receptor | 1.00E+00     | -1.102      | 1.00E+00     | 0           | 1.24E-01       | -1.23       | 3.08E-03       | -1.72       |
| FHL1   | four and a half LIM domains 1   |              |             |              |             | 2.10E-02       | -2.88       | 3.44E-02       | -1.783      |
| VIM    | vimentin                        | 9.23E-01     | -1.058      | 7.32E-01     | -1.226      | 9.94E-04       | -1.74       | 2.98E-02       | -1.433      |

**LMP1-no Inhibitors: Binding of Filaments (P = 1)**

**LMP1 no Inhs**

**LMP2 no Inhs**

**LMP1 with Inhs**

**LMP2 with Inhs**

none

**LMP2-no Inhibitors: Binding of Filaments (P = 1)**

**LMP1 no Inhs**

**LMP2 no Inhs**

**LMP1 with Inhs**

**LMP2 with Inhs**

none

**LMP1-with Inhibitors: Binding of Filaments (P = 0.0093)**

**LMP1 no Inhs**

**LMP2 no Inhs**

**LMP1 with Inhs**

**LMP2 with Inhs**

| Symbol | Entrez Gene Name                 | p-value  | Fold Change | p-value  | Fold Change | p-value  | Fold Change | p-value  | Fold Change |
|--------|----------------------------------|----------|-------------|----------|-------------|----------|-------------|----------|-------------|
| CGN    | cingulin                         | 1.00E+00 | 0           | 1.00E+00 | 0           | 1.41E-04 | 28.752      | 9.66E-01 | 1.025       |
| CSNK1D | casein kinase 1, delta           | 1.00E+00 | 0           | 1.00E+00 | 0           | 2.53E-02 | -1.754      | 4.94E-02 | -1.485      |
| FHL1   | four and a half LIM domains 1    |          |             |          |             | 2.10E-02 | -2.88       | 3.44E-02 | -1.783      |
| MAP2   | microtubule-associated protein 2 | 1.00E+00 | 0           | 1.00E+00 | 0           | 1.21E-03 | 14.588      | 1.00E+00 | 5.876       |
| VIM    | vimentin                         | 9.23E-01 | -1.058      | 7.32E-01 | -1.226      | 9.94E-04 | -1.74       | 2.98E-02 | -1.433      |

**LMP2-with Inhibitors: Binding of Filaments (P = 0.0132)**

**LMP1 no Inhs**

**LMP2 no Inhs**

**LMP1 with Inhs**

**LMP2 with Inhs**

| Symbol | Entrez Gene Name                | p-value  | Fold Change | p-value  | Fold Change | p-value  | Fold Change | p-value  | Fold Change |
|--------|---------------------------------|----------|-------------|----------|-------------|----------|-------------|----------|-------------|
| CSNK1D | casein kinase 1, delta          | 1.00E+00 | 0           | 1.00E+00 | 0           | 2.53E-02 | -1.754      | 4.94E-02 | -1.485      |
| FAS    | Fas cell surface death receptor | 1.00E+00 | -1.102      | 1.00E+00 | 0           | 1.24E-01 | -1.23       | 3.08E-03 | -1.72       |
| FHL1   | four and a half LIM domains 1   |          |             |          |             | 2.10E-02 | -2.88       | 3.44E-02 | -1.783      |
| VIM    | vimentin                        | 9.23E-01 | -1.058      | 7.32E-01 | -1.226      | 9.94E-04 | -1.74       | 2.98E-02 | -1.433      |

**LMP1-no Inhibitors: Epithelial Adherens Junction signaling (P = 0.0538)**

| Symbol | Entrez Gene Name                                    | LMP1 no Inhs |             | LMP2 no Inhs |             | LMP1 with Inhs |             | LMP2 with Inhs |             |
|--------|-----------------------------------------------------|--------------|-------------|--------------|-------------|----------------|-------------|----------------|-------------|
|        |                                                     | p-value      | Fold Change | p-value      | Fold Change | p-value        | Fold Change | p-value        | Fold Change |
| ARPC4  | actin related protein 2/3 complex, subunit 4, 20kDa | 1.11E-02     | -1.511      | 9.32E-01     | -1.010      | 5.30E-01       | -1.042      | 2.83E-01       | 1.177       |
| RAP1B  | RAP1B, member of RAS oncogene family                | 3.17E-02     | -3.786      | 1.00E00      | -3.401      | 8.56E-01       | 1.071       | 9.80E-01       | 1.010       |
| VCL    | vinculin                                            | 4.67E-02     | 1.468       | 9.93E-01     | -1.001      | 9.62E-02       | -1.607      | 1.00E00        | -1.583      |

**LMP2-no Inhibitors: Epithelial Adherens Junction signaling (P = 0.2805)**

| Symbol | Entrez Gene Name          | LMP1 no Inhs |             | LMP2 no Inhs |             | LMP1 with Inhs |             | LMP2 with Inhs |             |
|--------|---------------------------|--------------|-------------|--------------|-------------|----------------|-------------|----------------|-------------|
|        |                           | p-value      | Fold Change | p-value      | Fold Change | p-value        | Fold Change | p-value        | Fold Change |
| BAIAP2 | BAI1-associated protein 2 | 9.89E-01     | -1.006      | 3.81E-02     | -1.488      | 1.71E-01       | 1.399       | 7.03E-01       | -1.090      |

**LMP1-with Inhibitors: Epithelial Adherens Junction signaling (P = 4.976 x 10<sup>-5</sup>)**

| Symbol | Entrez Gene Name                                                              | LMP1 no Inhs |             | LMP2 no Inhs |             | LMP1 with Inhs |             | LMP2 with Inhs |             |
|--------|-------------------------------------------------------------------------------|--------------|-------------|--------------|-------------|----------------|-------------|----------------|-------------|
|        |                                                                               | p-value      | Fold Change | p-value      | Fold Change | p-value        | Fold Change | p-value        | Fold Change |
| ACTG1  | actin, gamma 1                                                                | 4.38E-01     | 2.212       | 9.31E-01     | 1.090       | 6.29E-03       | 1.182       | 1.00E00        | -1.548      |
| ACTN1  | actinin, alpha 1                                                              | 2.46E-01     | 1.725       | 7.05E-01     | -1.250      | 1.22E-03       | 1.884       | 9.70E-01       | 1.079       |
| ACTN4  | actinin, alpha 4                                                              | 3.46E-01     | 1.264       | 9.40E-01     | 1.023       | 3.67E-04       | 2.025       | 5.14E-01       | 1.040       |
| ARPC1A | actin related protein 2/3 complex, subunit 1A, 41kDa                          | 3.33E-01     | 1.922       | 7.89E-01     | 1.212       | 3.81E-02       | 1.382       | 2.37E-01       | -1.175      |
| CLINT1 | clathrin interactor 1                                                         | 1.00E00      | 1.298       | 1.00E00      | -1.059      | 1.95E-02       | 2.029       | 3.86E-01       | 1.386       |
| CLIP1  | CAP-GLY domain containing linker protein 1                                    | 7.27E-01     | 1.138       | 8.90E-02     | -2.449      | 4.59E-03       | 1.901       | 5.89E-01       | 1.072       |
| KEAP1  | kelch-like ECH-associated protein 1                                           | 1.00E-01     | 1.388       | 1.00E00      | 0.000       | 4.76E-02       | 1.310       | 1.49E-01       | -1.211      |
| LMO7   | LIM domain 7                                                                  | 1.00E00      | 3.035       |              |             | 7.46E-05       | 3.556       | 1.71E-01       | 1.471       |
| MET    | MET proto-oncogene, receptor tyrosine kinase                                  | 1.00E00      | 0.000       | 1.00E00      | 0.000       | 4.99E-02       | -1.277      | 6.91E-01       | 1.046       |
| MLLT4  | myeloid/lymphoid or mixed-lineage leukemia (trithorax homolog, Drosophila); t | 9.93E-01     | 1.006       | 8.64E-01     | 1.126       | 5.67E-03       | 1.452       | 4.75E-01       | 1.126       |
| MYL6   | myosin, light chain 6, alkali, smooth muscle and non-muscle                   | 5.11E-02     | 1.436       | 4.10E-01     | 1.254       | 1.40E-02       | 1.973       | 9.73E-03       | 1.755       |
| MYL9   | myosin, light chain 9, regulatory                                             | 1.00E00      | 0.000       | 1.00E00      | 0.000       | 4.54E-02       | 3.181       | 1.00E00        | -1.094      |
| PVRL1  | poliovirus receptor-related 1 (herpesvirus entry mediator C)                  | 1.00E00      | 2.603       | 1.00E00      | 3.312       | 4.31E-02       | -2.987      | 1.00E00        | 1.056       |
| TUBG1  | tubulin, gamma 1                                                              | 9.19E-01     | -1.036      | 8.47E-01     | 1.068       | 4.40E-02       | -1.277      | 5.92E-02       | -1.250      |

**LMP2-with Inhibitors: Epithelial Adherens Junction signaling (P = 0.5404)**

| Symbol | Entrez Gene Name                                            | LMP1 no Inhs |             | LMP2 no Inhs |             | LMP1 with Inhs |             | LMP2 with Inhs |             |
|--------|-------------------------------------------------------------|--------------|-------------|--------------|-------------|----------------|-------------|----------------|-------------|
|        |                                                             | p-value      | Fold Change | p-value      | Fold Change | p-value        | Fold Change | p-value        | Fold Change |
| ACTR2  | ARP2 actin-related protein 2 homolog (yeast)                | 3.55E-01     | 1.594       | 9.05E-01     | -1.028      | 8.73E-01       | -1.010      | 4.13E-02       | -1.124      |
| EPN3   | epsin 3                                                     |              |             |              |             | 1.73E-01       | 1.129       | 2.05E-02       | -1.594      |
| MYL6   | myosin, light chain 6, alkali, smooth muscle and non-muscle | 5.11E-02     | 1.436       | 4.10E-01     | 1.254       | 1.40E-02       | 1.973       | 9.73E-03       | 1.755       |

**LMP1-no Inhibitors: Sertoli Cell-Sertoli Cell Junction signaling (P = 1)**

None

**LMP2-no Inhibitors: Sertoli Cell-Sertoli Cell Junction signaling (P = 0.339)**

| Symbol | Entrez Gene Name                   | LMP1 no Inhs |                | LMP2 no Inhs |                | LMP1 with Inhs |                | LMP2 with Inhs |                 |
|--------|------------------------------------|--------------|----------------|--------------|----------------|----------------|----------------|----------------|-----------------|
|        |                                    | p-value(A1)  | Fold Change(A) | p-value(A2#) | Fold Change(A) | p-value(A3#)   | Fold Change(A) | p-value(A4)    | Fold Change(A4) |
| SPTBN1 | spectrin, beta, non-erythrocytic 1 | 2.24E-01     | -1.138         | 2.01E-02     | -1.613         | 7.98E-03       | 1.407          | 7.00E-01       | -1.251          |

**LMP1-with Inhibitors: Sertoli Cell-Sertoli Cell Junction signaling (P = 3.15 x 10<sup>-6</sup>)**

| Symbol | Entrez Gene Name                                                              | LMP1 no Inhs |                | LMP2 no Inhs |                | LMP1 with Inhs |                | LMP2 with Inhs |                 |
|--------|-------------------------------------------------------------------------------|--------------|----------------|--------------|----------------|----------------|----------------|----------------|-----------------|
|        |                                                                               | p-value(A1)  | Fold Change(A) | p-value(A2)  | Fold Change(A) | p-value(A3#)   | Fold Change(A) | p-value(A4)    | Fold Change(A4) |
| ACTG1  | actin, gamma 1                                                                | 4.38E-01     | 2.212          | 9.31E-01     | 1.090          | 6.29E-03       | 1.182          | 1.00E00        | -1.548          |
| ACTN1  | actinin, alpha 1                                                              | 2.46E-01     | 1.725          | 7.05E-01     | -1.250         | 1.22E-03       | 1.884          | 9.70E-01       | 1.079           |
| ACTN4  | actinin, alpha 4                                                              | 3.46E-01     | 1.264          | 9.40E-01     | 1.023          | 3.67E-04       | 2.025          | 5.14E-01       | 1.040           |
| CGN    | cingulin                                                                      | 1.00E00      | 0.000          | 1.00E00      | 0.000          | 1.41E-04       | 28.752         | 9.66E-01       | 1.025           |
| CLINT1 | clathrin interactor 1                                                         | 1.00E00      | 1.298          | 1.00E00      | -1.059         | 1.95E-02       | 2.029          | 3.86E-01       | 1.386           |
| ITGA5  | integrin, alpha 5 (fibronectin receptor, alpha polypeptide)                   | 3.64E-01     | -2.172         | 1.00E00      | -3.726         | 4.33E-02       | -2.098         | 2.27E-02       | -2.119          |
| KEAP1  | kelch-like ECH-associated protein 1                                           | 1.00E-01     | 1.388          | 1.00E00      | 0.000          | 4.76E-02       | 1.310          | 1.49E-01       | -1.211          |
| MAP2K2 | mitogen-activated protein kinase kinase 2                                     | 1.00E00      | -1.030         | 1.00E00      | 1.079          | 2.57E-02       | -1.397         | 2.02E-02       | -1.306          |
| MLLT4  | myeloid/lymphoid or mixed-lineage leukemia (trithorax homolog, Drosophila); t | 9.93E-01     | 1.006          | 8.64E-01     | 1.126          | 5.67E-03       | 1.452          | 4.75E-01       | 1.126           |
| PVRL1  | poliovirus receptor-related 1 (herpesvirus entry mediator C)                  | 1.00E00      | 2.603          | 1.00E00      | 3.312          | 4.31E-02       | -2.987         | 1.00E00        | 1.056           |
| RAB8B  | RAB8B, member RAS oncogene family                                             | 1.00E00      | 0.000          | 1.00E00      | 0.000          | 3.45E-02       | 1.901          | 9.61E-01       | 1.014           |
| SPTAN1 | spectrin, alpha, non-erythrocytic 1                                           | 5.03E-01     | 1.440          | 7.50E-01     | 1.140          | 8.59E-03       | -2.105         | 5.65E-01       | 1.132           |
| SPTBN1 | spectrin, beta, non-erythrocytic 1                                            | 2.24E-01     | -1.138         | 2.01E-02     | -1.613         | 7.98E-03       | 1.407          | 7.00E-01       | -1.251          |
| TJP1   | tight junction protein 1                                                      | 2.00E-01     | 1.561          | 7.48E-01     | -1.153         | 2.54E-02       | 1.457          | 6.26E-01       | -1.098          |
| TJP2   | tight junction protein 2                                                      | 9.86E-01     | -1.004         | 3.42E-01     | -1.502         | 1.24E-02       | 1.377          | 1.70E-01       | 1.164           |
| TJP3   | tight junction protein 3                                                      |              |                |              |                | 4.53E-02       | 2.144          | 5.41E-01       | 1.335           |
| TUBG1  | tubulin, gamma 1                                                              | 9.19E-01     | -1.036         | 8.47E-01     | 1.068          | 4.40E-02       | -1.277         | 5.92E-02       | -1.250          |
| YBX3   | Y box binding protein 3                                                       | 6.81E-01     | 1.320          | 4.39E-01     | -1.621         | 3.77E-02       | -1.300         | 1.55E-02       | -1.410          |

**LMP2-with Inhibitors: Sertoli Cell-Sertoli Cell Junction signaling (P = 0.477)**

| Symbol | Entrez Gene Name                                            | LMP1 no Inhs |                | LMP2 no Inhs |                | LMP1 with Inhs |                | LMP2 with Inhs |                  |
|--------|-------------------------------------------------------------|--------------|----------------|--------------|----------------|----------------|----------------|----------------|------------------|
|        |                                                             | p-value(A1)  | Fold Change(A) | p-value(A2)  | Fold Change(A) | p-value(A3)    | Fold Change(A) | p-value(A4#)   | Fold Change(A4#) |
| EPN3   | epsin 3                                                     |              |                |              |                | 1.73E-01       | 1.129          | 2.05E-02       | -1.594           |
| ITGA5  | integrin, alpha 5 (fibronectin receptor, alpha polypeptide) | 3.64E-01     | -2.172         | 1.00E00      | -3.726         | 4.33E-02       | -2.098         | 2.27E-02       | -2.119           |
| MAP2K2 | mitogen-activated protein kinase kinase 2                   | 1.00E00      | -1.030         | 1.00E00      | 1.079          | 2.57E-02       | -1.397         | 2.02E-02       | -1.306           |
| YBX3   | Y box binding protein 3                                     | 6.81E-01     | 1.320          | 4.39E-01     | -1.621         | 3.77E-02       | -1.300         | 1.55E-02       | -1.410           |

**LMP1-no Inhibitors: Remodeling of Epithelial Adherens Junctions (P = 0.0583)**

| Symbol | Entrez Gene Name                                    | LMP1 no Inhs |             | LMP2 no Inhs |             | LMP1 with Inhs |             | LMP2 with Inhs |             |
|--------|-----------------------------------------------------|--------------|-------------|--------------|-------------|----------------|-------------|----------------|-------------|
|        |                                                     | p-value      | Fold Change | p-value      | Fold Change | p-value        | Fold Change | p-value        | Fold Change |
| ARPC4  | actin related protein 2/3 complex, subunit 4, 20kDa | 1.11E-02     | -1.511      | 9.32E-01     | -1.01       | 5.30E-01       | -1.042      | 2.83E-01       | 1.177       |
| VCL    | vinculin                                            | 4.67E-02     | 1.468       | 9.93E-01     | -1.001      | 9.62E-02       | -1.607      | 1.00E+00       | -1.583      |

**LMP2-no Inhibitors: Remodeling of Epithelial Adherens Junctions (P = 0.14)**

| Symbol | Entrez Gene Name                  | LMP1 no Inhs |             | LMP2 no Inhs |             | LMP1 with Inhs |             | LMP2 with Inhs |             |
|--------|-----------------------------------|--------------|-------------|--------------|-------------|----------------|-------------|----------------|-------------|
|        |                                   | p-value      | Fold Change | p-value      | Fold Change | p-value        | Fold Change | p-value        | Fold Change |
| RAB7A  | RAB7A, member RAS oncogene family | 8.84E-02     | -1.314      | 4.01E-02     | -1.687      | 4.68E-02       | -1.305      | 3.69E-02       | -1.902      |

**LMP1-with Inhibitors: Remodeling of Epithelial Adherens Junctions (P = 0.00048)**

| Symbol | Entrez Gene Name                                     | LMP1 no Inhs |             | LMP2 no Inhs |             | LMP1 with Inhs |             | LMP2 with Inhs |             |
|--------|------------------------------------------------------|--------------|-------------|--------------|-------------|----------------|-------------|----------------|-------------|
|        |                                                      | p-value      | Fold Change | p-value      | Fold Change | p-value        | Fold Change | p-value        | Fold Change |
| ACTG1  | actin, gamma 1                                       | 4.38E-01     | 2.212       | 9.31E-01     | 1.09        | 6.29E-03       | 1.182       | 1.00E+00       | -1.548      |
| ACTN1  | actinin, alpha 1                                     | 2.46E-01     | 1.725       | 7.05E-01     | -1.25       | 1.22E-03       | 1.884       | 9.70E-01       | 1.079       |
| ACTN4  | actinin, alpha 4                                     | 3.46E-01     | 1.264       | 9.40E-01     | 1.023       | 3.67E-04       | 2.025       | 5.14E-01       | 1.04        |
| ARPC1A | actin related protein 2/3 complex, subunit 1A, 41kDa | 3.33E-01     | 1.922       | 7.89E-01     | 1.212       | 3.81E-02       | 1.382       | 2.37E-01       | -1.175      |
| CLIP1  | CAP-GLY domain containing linker protein 1           | 7.27E-01     | 1.138       | 8.90E-02     | -2.449      | 4.59E-03       | 1.901       | 5.89E-01       | 1.072       |
| MET    | MET proto-oncogene, receptor tyrosine kinase         | 1.00E+00     | 0           | 1.00E+00     | 0           | 4.99E-02       | -1.277      | 6.91E-01       | 1.046       |
| RAB7A  | RAB7A, member RAS oncogene family                    | 8.84E-02     | -1.314      | 4.01E-02     | -1.687      | 4.68E-02       | -1.305      | 3.69E-02       | -1.902      |
| TUBG1  | tubulin, gamma 1                                     | 9.19E-01     | -1.036      | 8.47E-01     | 1.068       | 4.40E-02       | -1.277      | 5.92E-02       | -1.25       |

**LMP2-with Inhibitors: Remodeling of Epithelial Adherens Junctions (P = 0.3746)**

| Symbol | Entrez Gene Name                             | LMP1 no Inhs |             | LMP2 no Inhs |             | LMP1 with Inhs |             | LMP2 with Inhs |             |
|--------|----------------------------------------------|--------------|-------------|--------------|-------------|----------------|-------------|----------------|-------------|
|        |                                              | p-value      | Fold Change | p-value      | Fold Change | p-value        | Fold Change | p-value        | Fold Change |
| ACTR2  | ARP2 actin-related protein 2 homolog (yeast) | 3.55E-01     | 1.594       | 9.05E-01     | -1.028      | 8.73E-01       | -1.01       | 4.13E-02       | -1.124      |
| RAB7A  | RAB7A, member RAS oncogene family            | 8.84E-02     | -1.314      | 4.01E-02     | -1.687      | 4.68E-02       | -1.305      | 3.69E-02       | -1.902      |

| <b>LMP1-no Inhibitors: Tight Junction signaling (P = 0.620)</b>     |                                                                                          | <b>LMP1 no Inhs</b> |                    | <b>LMP2 no Inhs</b> |                    | <b>LMP1 with Inhs</b> |                    | <b>LMP2 with Inhs</b> |                    |
|---------------------------------------------------------------------|------------------------------------------------------------------------------------------|---------------------|--------------------|---------------------|--------------------|-----------------------|--------------------|-----------------------|--------------------|
| <b>Symbol</b>                                                       | <b>Entrez Gene Name</b>                                                                  | <b>p-value</b>      | <b>Fold Change</b> | <b>p-value</b>      | <b>Fold Change</b> | <b>p-value</b>        | <b>Fold Change</b> | <b>p-value</b>        | <b>Fold Change</b> |
| VCL                                                                 | vinculin                                                                                 | 4.67E-02            | 1.468              | 9.93E-01            | -1.001             | 9.62E-02              | -1.607             | 1.00E+00              | -1.583             |
| <b>LMP2-no Inhibitors: Tight Junction signaling (P = 0.0528)</b>    |                                                                                          | <b>LMP1 no Inhs</b> |                    | <b>LMP2 no Inhs</b> |                    | <b>LMP1 with Inhs</b> |                    | <b>LMP2 with Inhs</b> |                    |
| <b>Symbol</b>                                                       | <b>Entrez Gene Name</b>                                                                  | <b>p-value</b>      | <b>Fold Change</b> | <b>p-value</b>      | <b>Fold Change</b> | <b>p-value</b>        | <b>Fold Change</b> | <b>p-value</b>        | <b>Fold Change</b> |
| CPSF6                                                               | cleavage and polyadenylation specific factor 6, 68kDa                                    | 4.86E-01            | -1.65              | 1.63E-03            | 1.269              | 9.69E-01              | 1.014              | 8.00E-01              | -1.077             |
| VAMP3                                                               | vesicle-associated membrane protein 3                                                    | 5.35E-01            | -1.358             | 1.14E-03            | -1.687             | 2.83E-01              | -1.167             | 5.43E-02              | 1.295              |
| <b>LMP1-with Inhibitors: Tight Junction signaling (P = 0.00062)</b> |                                                                                          | <b>LMP1 no Inhs</b> |                    | <b>LMP2 no Inhs</b> |                    | <b>LMP1 with Inhs</b> |                    | <b>LMP2 with Inhs</b> |                    |
| <b>Symbol</b>                                                       | <b>Entrez Gene Name</b>                                                                  | <b>p-value</b>      | <b>Fold Change</b> | <b>p-value</b>      | <b>Fold Change</b> | <b>p-value</b>        | <b>Fold Change</b> | <b>p-value</b>        | <b>Fold Change</b> |
| ACTG1                                                               | actin, gamma 1                                                                           | 4.38E-01            | 2.212              | 9.31E-01            | 1.09               | 6.29E-03              | 1.182              | 1.00E+00              | -1.548             |
| CGN                                                                 | cingulin                                                                                 | 1.00E+00            | 0                  | 1.00E+00            | 0                  | 1.41E-04              | 28.752             | 9.66E-01              | 1.025              |
| CPSF3                                                               | cleavage and polyadenylation specific factor 3, 73kDa                                    | 2.10E-01            | -1.563             | 4.60E-01            | -1.418             | 3.02E-02              | -1.601             | 1.42E-01              | -1.175             |
| CSTF2                                                               | cleavage stimulation factor, 3' pre-RNA, subunit 2, 64kDa                                | 7.34E-01            | -1.161             | 7.83E-01            | -1.222             | 1.17E-02              | -1.791             | 2.56E-01              | -1.242             |
| MLLT4                                                               | myeloid/lymphoid or mixed-lineage leukemia (trithorax homolog, Drosophila); translocatex | 9.93E-01            | 1.006              | 8.64E-01            | 1.126              | 5.67E-03              | 1.452              | 4.75E-01              | 1.126              |
| MYL6                                                                | myosin, light chain 6, alkali, smooth muscle and non-muscle                              | 5.11E-02            | 1.436              | 4.10E-01            | 1.254              | 1.40E-02              | 1.973              | 9.73E-03              | 1.755              |
| MYL9                                                                | myosin, light chain 9, regulatory                                                        | 1.00E+00            | 0                  | 1.00E+00            | 0                  | 4.54E-02              | 3.181              | 1.00E+00              | -1.094             |
| PVRL1                                                               | poliovirus receptor-related 1 (herpesvirus entry mediator C)                             | 1.00E+00            | 2.603              | 1.00E+00            | 3.312              | 4.31E-02              | -2.987             | 1.00E+00              | 1.056              |
| SPTAN1                                                              | spectrin, alpha, non-erythrocytic 1                                                      | 5.03E-01            | 1.44               | 7.50E-01            | 1.14               | 8.59E-03              | -2.105             | 5.65E-01              | 1.132              |
| TJP1                                                                | tight junction protein 1                                                                 | 2.00E-01            | 1.561              | 7.48E-01            | -1.153             | 2.54E-02              | 1.457              | 6.26E-01              | -1.098             |
| TJP2                                                                | tight junction protein 2                                                                 | 9.86E-01            | -1.004             | 3.42E-01            | -1.502             | 1.24E-02              | 1.377              | 1.70E-01              | 1.164              |
| TJP3                                                                | tight junction protein 3                                                                 |                     |                    |                     |                    | 4.53E-02              | 2.144              | 5.41E-01              | 1.335              |
| YBX3                                                                | Y box binding protein 3                                                                  | 6.81E-01            | 1.32               | 4.39E-01            | -1.621             | 3.77E-02              | -1.3               | 1.55E-02              | -1.41              |
| <b>LMP2-with Inhibitors: Tight Junction signaling (P = 0.2164)</b>  |                                                                                          | <b>LMP1 no Inhs</b> |                    | <b>LMP2 no Inhs</b> |                    | <b>LMP1 with Inhs</b> |                    | <b>LMP2 with Inhs</b> |                    |
| <b>Symbol</b>                                                       | <b>Entrez Gene Name</b>                                                                  | <b>p-value</b>      | <b>Fold Change</b> | <b>p-value</b>      | <b>Fold Change</b> | <b>p-value</b>        | <b>Fold Change</b> | <b>p-value</b>        | <b>Fold Change</b> |
| GOSR1                                                               | golgi SNAP receptor complex member 1                                                     | 1.00E+00            | 1.325              | 1.00E+00            | 0                  | 3.79E-01              | -1.545             | 9.61E-03              | -3.951             |
| MYL6                                                                | myosin, light chain 6, alkali, smooth muscle and non-muscle                              | 5.11E-02            | 1.436              | 4.10E-01            | 1.254              | 1.40E-02              | 1.973              | 9.73E-03              | 1.755              |
| NFKB1                                                               | nuclear factor of kappa light polypeptide gene enhancer in B-cells 1                     | 7.54E-01            | -1.28              | 8.35E-01            | 1.177              | 9.42E-02              | 1.205              | 1.63E-02              | 1.226              |
| PPP2R2A                                                             | protein phosphatase 2, regulatory subunit B, alpha                                       | 4.81E-01            | 1.459              | 8.73E-01            | 1.147              | 2.85E-01              | -1.232             | 7.48E-03              | -1.358             |
| YBX3                                                                | Y box binding protein 3                                                                  | 6.81E-01            | 1.32               | 4.39E-01            | -1.621             | 3.77E-02              | -1.3               | 1.55E-02              | -1.41              |
