# Supplementary material for: Global Proteomic Changes Induced by the Epstein-Barr Virus Oncoproteins Latent Membrane Protein 1 and 2A
Source: PubMed Central journal article supplement (PMC6016245; doi:10.1128/mbio.00959-18), 2018-06-19
Supplement: mbo003183928st5.pdf [file mbo003183928st5.pdf]

## Supplemental Table-5

| Symbol   | Entrez Gene Name                                                               | LMP1 no Inhs |             | LMP2 no Inhs |             | LMP1 with Inhs |             | LMP2 with Inhs |             |
|----------|--------------------------------------------------------------------------------|--------------|-------------|--------------|-------------|----------------|-------------|----------------|-------------|
|          |                                                                                | p-value      | Fold Change | p-value      | Fold Change | p-value        | Fold Change | p-value        | Fold Change |
| AARS     | alanyl-tRNA synthetase                                                         | 1.92E-02     | -1.264      | 8.69E-01     | -1.099      | 8.53E-03       | -1.189      | 2.05E-01       | 1.093       |
| ACACA    | acetyl-CoA carboxylase alpha                                                   | 1.81E-02     | -2.870      | 2.91E-01     | -1.911      | 8.33E-01       | 1.051       | 9.42E-01       | -1.014      |
| CALD1    | caldesmon 1                                                                    | 4.76E-03     | 2.401       | 5.94E-01     | 1.512       | 2.10E-03       | 3.792       | 8.07E-01       | -1.175      |
| CAPN1    | calpain 1, (mu/l) large subunit                                                | 4.38E-02     | -1.239      | 9.13E-01     | 1.017       | 1.09E-01       | 1.277       | 8.11E-01       | 1.037       |
| CAPNS1   | calpain, small subunit 1                                                       | 1.07E-02     | 1.386       | 1.35E-01     | 1.316       | 2.97E-01       | 1.078       | 1.28E-01       | -1.125      |
| CENPF    | centromere protein F, 350/400kDa                                               | 3.29E-02     | -2.717      | 1.00E00      | -1.196      | 8.97E-02       | 5.906       | 1.00E00        | 3.202       |
| CNN2     | calponin 2                                                                     | 3.14E-02     | 1.550       | 3.23E-01     | 1.388       | 8.13E-04       | 1.753       | 6.26E-02       | 1.246       |
| CNP      | 2',3'-cyclic nucleotide 3' phosphodiesterase                                   | 1.12E-03     | 2.459       | 1.57E-01     | 2.946       | 3.90E-01       | 1.116       | 7.81E-01       | 1.035       |
| CSK      | c-src tyrosine kinase                                                          | 5.95E-03     | -1.902      | 3.88E-01     | -1.572      | 1.36E-02       | 1.380       | 1.62E-01       | -1.099      |
| DSP      | desmoplakin                                                                    | 1.42E-02     | 1.418       | 6.00E-01     | 1.081       | 7.88E-01       | 1.044       | 8.70E-01       | 1.019       |
| EHD4     | EH-domain containing 4                                                         | 3.96E-02     | -1.276      | 2.22E-02     | -1.300      | 1.77E-01       | -1.137      | 6.55E-01       | -1.055      |
| EIF6     | eukaryotic translation initiation factor 6                                     | 4.67E-02     | 1.734       | 5.51E-01     | 1.093       | 6.08E-01       | -1.138      | 6.49E-01       | -1.115      |
| EIF2AK2  | eukaryotic translation initiation factor 2-alpha kinase 2                      | 3.04E-02     | -1.756      | 5.90E-01     | 1.081       | 5.77E-01       | -1.088      | 3.84E-01       | -1.125      |
| EIF4A1   | eukaryotic translation initiation factor 4A1                                   | 2.22E-02     | -1.494      | 6.00E-01     | -1.108      | 5.36E-03       | -1.474      | 2.21E-03       | -1.518      |
| ETFB     | electron-transfer-flavoprotein, beta polypeptide                               | 4.27E-02     | 1.162       | 3.16E-01     | 1.041       | 1.85E-01       | -1.093      | 1.00E00        | 818.746     |
| FAH      | fumarylacetoacetate hydrolase (fumarylacetoacetase)                            | 4.01E-02     | -1.640      | 9.24E-01     | -1.035      | 9.52E-01       | 1.046       | 7.64E-01       | -1.253      |
| FERMT1   | fermitin family member 1                                                       | 4.37E-02     | 1.591       | 1.00E00      | 0.000       | 2.18E-01       | -1.197      | 2.25E-01       | -1.175      |
| FLOT2    | flotillin 2                                                                    | 3.55E-02     | -1.664      | 3.63E-01     | -2.093      | 6.31E-01       | 1.078       | 9.33E-01       | 1.015       |
| FTO      | fat mass and obesity associated                                                | 1.66E-02     | -1.632      | 1.00E00      | -1.286      | 1.40E-01       | 1.294       | 9.58E-01       | -1.014      |
| GTPBP4   | GTP binding protein 4                                                          | 3.60E-02     | -1.865      | 1.48E-01     | -1.236      | 7.49E-01       | -1.158      | 4.71E-01       | -1.345      |
| HK1      | hexokinase 1                                                                   | 3.25E-03     | -1.363      | 2.59E-01     | -1.360      | 5.00E-02       | -1.264      | 8.03E-01       | 1.025       |
| HMGB3    | high mobility group box 3                                                      | 1.91E-02     | -1.541      | 1.01E-01     | -2.475      | 4.81E-01       | 1.394       | 3.92E-01       | -1.465      |
| HNRNPAB  | heterogeneous nuclear ribonucleoprotein A/B                                    | 3.29E-02     | -1.223      | 5.36E-01     | 1.118       | 1.53E-01       | -1.147      | 1.58E-01       | -1.152      |
| HNRNPD   | heterogeneous nuclear ribonucleoprotein D (AU-rich element RNA binding protein | 1.54E-03     | -1.454      | 2.69E-01     | -1.169      | 6.70E-01       | 2.011       | 5.09E-01       | 2.793       |
| HSPB1    | heat shock 27kDa protein 1                                                     | 1.20E-02     | 3.427       | 2.30E-01     | 1.936       | 2.29E-01       | 1.449       | 9.29E-01       | -1.043      |
| ILF2     | interleukin enhancer binding factor 2                                          | 4.35E-02     | -1.524      | 7.87E-01     | 1.098       | 5.75E-01       | -1.092      | 8.51E-01       | -1.031      |
| LAMB1    | laminin, beta 1                                                                | 2.92E-02     | -2.479      | 1.00E00      | 1.431       | 1.80E-02       | -1.475      | 2.43E-01       | -1.522      |
| LAMC1    | laminin, gamma 1 (formerly LAMB2)                                              | 3.17E-02     | -1.770      | 7.30E-02     | -2.375      | 6.76E-01       | -1.543      | 7.57E-01       | -1.306      |
| MTHFD1   | methylenetetrahydrofolate dehydrogenase (NADP+ dependent) 1, methenyltetrahy   | 8.02E-03     | -1.311      | 2.64E-01     | -1.172      | 1.29E-03       | -1.305      | 3.85E-01       | -1.071      |
| MVP      | major vault protein                                                            | 1.50E-02     | 1.448       | 5.34E-01     | -1.110      | 3.14E-04       | 1.512       | 1.29E-01       | -1.259      |
| MYBBP1A  | MYB binding protein (P160) 1a                                                  | 1.16E-02     | -1.524      | 5.32E-01     | -1.070      | 3.38E-02       | -1.329      | 5.27E-02       | -1.161      |
| NDRG1    | N-myc downstream regulated 1                                                   | 1.89E-04     | 2.066       | 3.24E-02     | 2.279       | 2.95E-01       | -1.325      | 1.22E-01       | 1.474       |
| PCNA     | proliferating cell nuclear antigen                                             | 1.39E-02     | -1.567      | 8.60E-01     | -1.042      | 1.07E-01       | -1.523      | 8.93E-02       | -1.434      |
| PGK1     | phosphoglycerate kinase 1                                                      | 2.51E-02     | -1.177      | 5.67E-01     | -1.100      | 4.53E-01       | -1.196      | 9.56E-01       | -1.011      |
| PHB      | prohibitin                                                                     | 2.29E-02     | 1.435       | 2.84E-01     | 1.437       | 7.44E-01       | 1.094       | 4.09E-01       | 1.192       |
| PRKCDBP  | protein kinase C, delta binding protein                                        | 2.12E-02     | 2.481       | 3.25E-01     | 2.001       | 3.10E-01       | 2.533       | 6.45E-01       | 1.506       |
| PRMT1    | protein arginine methyltransferase 1                                           | 3.87E-02     | -1.653      | 7.42E-01     | -1.151      | 5.54E-01       | -1.430      | 7.56E-01       | -1.140      |
| PSMD2    | proteasome (prosome, macropain) 26S subunit, non-ATPase, 2                     | 5.38E-03     | 1.171       | 1.21E-01     | 1.472       | 2.87E-01       | -1.067      | 2.70E-02       | -1.227      |
| RAB1A    | RAB1A, member RAS oncogene family                                              | 2.65E-02     | 1.585       | 5.74E-01     | -1.775      | 6.03E-01       | -1.222      | 5.66E-01       | -1.260      |
| RAP1B    | RAP1B, member of RAS oncogene family                                           | 3.17E-02     | -3.786      | 1.00E00      | -3.401      | 8.56E-01       | 1.071       | 9.80E-01       | 1.010       |
| SART1    | squamous cell carcinoma antigen recognized by T cells                          | 3.31E-02     | 1.731       | 8.46E-01     | -1.160      | 6.71E-01       | 1.075       | 1.65E-01       | 1.212       |
| SERPINB5 | serpin peptidase inhibitor, clade B (ovalbumin), member 5                      | 1.15E-02     | 1.984       | 9.97E-02     | 1.719       | 5.35E-01       | 1.261       | 5.81E-01       | 1.299       |
| SFN      | stratifin                                                                      | 3.53E-02     | 2.029       | 2.01E-01     | 1.754       | 2.44E-01       | -1.200      | 6.46E-01       | -1.123      |
| SRSF5    | serine/arginine-rich splicing factor 5                                         | 1.02E-02     | 1.674       | 2.60E-02     | 1.289       | 5.90E-01       | -1.144      | 7.75E-01       | 1.067       |

|         |                                                                        |          |        |          |        |          |        |          |        |
|---------|------------------------------------------------------------------------|----------|--------|----------|--------|----------|--------|----------|--------|
| THOC1   | THO complex 1                                                          | 7.01E-03 | -2.126 | 1.00E00  | -2.396 | 3.57E-01 | -1.181 | 8.65E-01 | 1.021  |
| TOP1    | topoisomerase (DNA) I                                                  | 4.71E-02 | -1.434 | 6.68E-01 | -1.064 | 2.27E-01 | -1.276 | 9.74E-01 | 1.005  |
| TPD52L1 | tumor protein D52-like 1                                               | 4.74E-02 | 1.692  | 3.73E-01 | 1.739  | 3.92E-02 | 2.140  | 8.26E-01 | 1.079  |
| TXN     | thioredoxin                                                            | 1.16E-02 | 1.420  | 2.42E-01 | 1.211  | 9.26E-02 | 1.313  | 5.66E-01 | 1.169  |
| USP5    | ubiquitin specific peptidase 5 (isopeptidase T)                        | 2.61E-02 | -1.490 | 2.34E-01 | 1.187  | 2.52E-01 | -1.063 | 6.03E-02 | -1.150 |
| VCL     | vinculin                                                               | 4.67E-02 | 1.468  | 9.93E-01 | -1.001 | 9.62E-02 | -1.607 | 1.00E00  | -1.583 |
| XRCC1   | X-ray repair complementing defective repair in Chinese hamster cells 1 | 1.26E-02 | -5.060 | 1.00E00  | 0.000  | 8.02E-01 | 1.055  | 8.55E-01 | 1.061  |

**LMP2-no Inhibitors: Proliferation of Cells (P = 0.00195)**

| Symbol   | Entrez Gene Name                                                                    | LMP1 no Inhs |             | LMP2 no Inhs |             | LMP1 with Inhs |             | LMP2 with Inhs |             |
|----------|-------------------------------------------------------------------------------------|--------------|-------------|--------------|-------------|----------------|-------------|----------------|-------------|
|          |                                                                                     | p-value      | Fold Change | p-value      | Fold Change | p-value        | Fold Change | p-value        | Fold Change |
| BAIAP2   | BAI1-associated protein 2                                                           | 9.89E-01     | -1.006      | 3.81E-02     | -1.488      | 1.71E-01       | 1.399       | 7.03E-01       | -1.090      |
| BYSL     | bystin-like                                                                         | 1.00E00      | -1.533      | 3.65E-02     | -1.628      | 2.67E-01       | 1.290       | 9.19E-02       | 1.381       |
| CWC27    | CWC27 spliceosome-associated protein homolog (S. cerevisiae)                        | 7.64E-01     | -1.078      | 1.98E-02     | 2.835       | 7.88E-01       | -1.172      | 8.24E-01       | -1.106      |
| EHD4     | EH-domain containing 4                                                              | 3.96E-02     | -1.276      | 2.22E-02     | -1.300      | 1.77E-01       | -1.137      | 6.55E-01       | -1.055      |
| FABP5    | fatty acid binding protein 5 (psoriasis-associated)                                 | 8.16E-01     | -1.168      | 4.48E-02     | -1.493      | 8.47E-01       | 1.072       | 3.98E-01       | -1.361      |
| HNRNPA1  | heterogeneous nuclear ribonucleoprotein A1                                          | 1.89E-01     | -1.175      | 4.40E-02     | 1.292       | 1.79E-01       | -1.311      | 4.20E-01       | -1.220      |
| IGF2BP3  | insulin-like growth factor 2 mRNA binding protein 3                                 | 7.30E-01     | 1.216       | 3.56E-03     | -1.963      | 5.05E-01       | -1.102      | 1.29E-02       | -2.325      |
| LAP3     | leucine aminopeptidase 3                                                            | 2.18E-01     | -1.088      | 1.94E-02     | 1.487       | 7.39E-02       | 1.138       | 8.98E-01       | -1.012      |
| MYOF     | myoferlin                                                                           | 7.11E-01     | -1.120      | 1.89E-02     | -2.038      | 6.03E-02       | 1.643       | 2.61E-01       | -1.391      |
| NDRG1    | N-myc downstream regulated 1                                                        | 1.89E-04     | 2.066       | 3.24E-02     | 2.279       | 2.95E-01       | -1.325      | 1.22E-01       | 1.474       |
| PALLD    | palladin, cytoskeletal associated protein                                           | 4.62E-01     | 1.576       | 3.76E-02     | -2.936      | 1.09E-01       | 1.526       | 5.44E-01       | -1.088      |
| PML      | promyelocytic leukemia                                                              | 4.01E-01     | -1.174      | 2.33E-02     | -2.367      | 7.11E-01       | 1.114       | 4.66E-02       | -1.449      |
| PNPT1    | polyribonucleotide nucleotidyltransferase 1                                         | 1.96E-01     | -1.028      | 6.97E-03     | 1.380       | 6.08E-01       | -1.064      | 2.69E-01       | 1.150       |
| PRDX2    | peroxiredoxin 2                                                                     | 1.52E-01     | 1.178       | 3.39E-02     | 1.213       | 6.38E-01       | 1.268       | 6.44E-01       | 1.294       |
| RPS25    | ribosomal protein S25                                                               | 1.52E-01     | 1.140       | 3.99E-02     | 1.423       | 8.54E-01       | -1.043      | 4.58E-01       | -1.207      |
| S100A4   | S100 calcium binding protein A4                                                     | 9.45E-01     | 1.096       | 3.90E-03     | 7.360       | 3.00E-02       | -1.797      | 1.74E-01       | 1.771       |
| SERPINH1 | serpin peptidase inhibitor, clade H (heat shock protein 47), member 1, (collagen bi | 1.60E-01     | -1.194      | 3.32E-02     | 1.173       | 5.04E-01       | -1.226      | 3.12E-01       | -1.246      |
| SPTBN1   | spectrin, beta, non-erythrocytic 1                                                  | 2.24E-01     | -1.138      | 2.01E-02     | -1.613      | 7.98E-03       | 1.407       | 7.00E-01       | -1.251      |
| SRSF5    | serine/arginine-rich splicing factor 5                                              | 1.02E-02     | 1.674       | 2.60E-02     | 1.289       | 5.90E-01       | -1.144      | 7.75E-01       | 1.067       |
| TPP2     | tripeptidyl peptidase II                                                            | 2.42E-01     | -2.510      | 4.73E-02     | -1.323      | 1.41E-01       | -1.243      | 8.26E-01       | 1.019       |
| TXNDC5   | thioredoxin domain containing 5 (endoplasmic reticulum)                             | 5.44E-02     | -1.447      | 5.42E-03     | -1.371      | 6.94E-01       | -1.045      | 9.38E-01       | -1.008      |

**LMP1-with Inhibitors: Proliferation of Cells (P = 2.05 x 10<sup>-10</sup>)**

| Symbol   | Entrez Gene Name                                | LMP1 no Inhs |             | LMP2 no Inhs |             | LMP1 with Inhs |             | LMP2 with Inhs |             |
|----------|-------------------------------------------------|--------------|-------------|--------------|-------------|----------------|-------------|----------------|-------------|
|          |                                                 | p-value      | Fold Change | p-value      | Fold Change | p-value        | Fold Change | p-value        | Fold Change |
| AARS     | alanyl-tRNA synthetase                          | 1.92E-02     | -1.264      | 8.69E-01     | -1.099      | 8.53E-03       | -1.189      | 2.05E-01       | 1.093       |
| AATF     | apoptosis antagonizing transcription factor     | 3.12E-01     | -1.370      | 4.76E-01     | 1.207       | 3.10E-02       | -1.210      | 4.32E-01       | -1.074      |
| ACLY     | ATP citrate lyase                               | 3.01E-01     | -1.500      | 9.17E-01     | 1.032       | 3.15E-02       | 1.159       | 3.79E-02       | 1.167       |
| ACP1     | acid phosphatase 1, soluble                     | 3.10E-01     | -1.434      | 3.69E-01     | -1.690      | 6.27E-03       | -1.337      | 8.63E-01       | 1.012       |
| ACTG1    | actin, gamma 1                                  | 4.38E-01     | 2.212       | 9.31E-01     | 1.090       | 6.29E-03       | 1.182       | 1.00E00        | -1.548      |
| ACTN1    | actinin, alpha 1                                | 2.46E-01     | 1.725       | 7.05E-01     | -1.250      | 1.22E-03       | 1.884       | 9.70E-01       | 1.079       |
| ACTN4    | actinin, alpha 4                                | 3.46E-01     | 1.264       | 9.40E-01     | 1.023       | 3.67E-04       | 2.025       | 5.14E-01       | 1.040       |
| ADA      | adenosine deaminase                             | 1.00E00      | 1.395       | 1.00E00      | 1.473       | 4.25E-02       | 2.018       | 2.17E-01       | -1.495      |
| ADK      | adenosine kinase                                | 5.55E-01     | 1.209       | 1.50E-01     | 1.657       | 1.68E-02       | -1.327      | 7.69E-02       | -1.153      |
| AGO2     | argonaute RISC catalytic component 2            | 1.00E00      | 1.578       | 1.00E00      | 1.280       | 1.64E-02       | -1.539      | 1.37E-01       | -1.335      |
| AMD1     | adenosylmethionine decarboxylase 1              | 1.00E00      | 0.000       | 1.00E00      | 0.000       | 1.12E-02       | -1.933      | 1.00E00        |             |
| ANXA1    | annexin A1                                      | 1.02E-01     | 1.681       | 1.66E-01     | 1.297       | 1.25E-02       | 1.272       | 7.77E-01       | -1.021      |
| ANXA2    | annexin A2                                      | 6.69E-01     | 1.181       | 1.65E-01     | 1.204       | 1.96E-02       | 1.394       | 2.54E-01       | 1.175       |
| ANXA11   | annexin A11                                     | 9.61E-01     | -1.021      | 8.77E-01     | 1.084       | 7.01E-03       | 1.739       | 1.27E-01       | 1.222       |
| ARHGEF11 | Rho guanine nucleotide exchange factor (GEF) 11 | 1.00E00      | 0.000       | 1.00E00      | 0.000       | 1.83E-02       | 1.612       | 6.07E-01       | -1.132      |

|          |                                                             |          |        |          |        |          |        |          |        |
|----------|-------------------------------------------------------------|----------|--------|----------|--------|----------|--------|----------|--------|
| ATP6V0D1 | ATPase, H+ transporting, lysosomal 38kDa, V0 subunit d1     | 1.00E00  | 0.000  | 1.00E00  | 0.000  | 3.25E-02 | 1.934  | 4.54E-02 | 1.720  |
| BAG1     | BCL2-associated athanogene                                  | 1.00E00  | 0.000  | 1.00E00  | 0.000  | 2.96E-03 | 2.613  | 9.49E-01 | 1.028  |
| BCLAF1   | BCL2-associated transcription factor 1                      | 2.45E-01 | 1.432  | 8.27E-01 | -1.070 | 1.38E-02 | -1.654 | 8.10E-01 | 1.037  |
| BIN3     | bridging integrator 3                                       | 1.00E00  | 0.000  | 1.00E00  | 0.000  | 1.01E-02 | 2.156  | 9.13E-01 | 1.033  |
| BIRC3    | baculoviral IAP repeat containing 3                         | 1.00E00  | 0.000  | 1.00E00  | 0.000  | 1.58E-02 | -1.760 | 6.50E-01 | -1.027 |
| C9orf78  | chromosome 9 open reading frame 78                          | 1.00E00  | 0.000  | 1.00E00  | 0.000  | 4.73E-02 | -1.681 | 1.18E-02 | -2.795 |
| CALD1    | caldesmon 1                                                 | 4.76E-03 | 2.401  | 5.94E-01 | 1.512  | 2.10E-03 | 3.792  | 8.07E-01 | -1.175 |
| CASP1    | caspase 1, apoptosis-related cysteine peptidase             | 1.00E00  | 1.079  | 1.57E-01 | -1.776 | 3.91E-02 | 1.376  | 4.70E-01 | -1.299 |
| CAST     | calpastatin                                                 | 5.69E-01 | 1.357  | 1.59E-01 | 2.535  | 6.79E-03 | 1.556  | 2.02E-01 | 1.279  |
| CBX1     | chromobox homolog 1                                         | 1.00E00  | -2.276 | 1.00E00  | 1.612  | 2.66E-02 | -1.502 | 2.12E-01 | -1.267 |
| CCDC88A  | coiled-coil domain containing 88A                           | 1.00E00  | 0.000  | 1.00E00  | 0.000  | 9.06E-03 | -1.440 | 9.99E-01 | 1.000  |
| CD44     | CD44 molecule (Indian blood group)                          | 4.40E-01 | -2.277 | 1.34E-01 | -3.127 | 5.16E-03 | -1.316 | 4.93E-01 | -1.089 |
| CD99     | CD99 molecule                                               | 1.00E00  | 0.000  | 1.00E00  | 0.000  | 1.94E-02 | 2.356  | 2.42E-01 | 1.329  |
| CDK5     | cyclin-dependent kinase 5                                   | 1.00E00  | 0.000  | 1.00E00  | 0.000  | 1.64E-02 | -1.426 | 2.70E-01 | 1.029  |
| CDK2AP1  | cyclin-dependent kinase 2 associated protein 1              | 1.00E00  | 0.000  | 1.00E00  | 0.000  | 4.59E-03 | -2.260 | 7.60E-01 | -1.022 |
| CFDP1    | craniofacial development protein 1                          | 1.00E00  | 0.000  | 1.00E00  | 0.000  | 4.08E-02 | 2.017  | 4.03E-01 | 1.514  |
| CGREF1   | cell growth regulator with EF-hand domain 1                 |          |        |          |        | 2.30E-02 | -1.165 | 3.49E-01 | -1.542 |
| CIB1     | calcium and integrin binding 1 (calmyrin)                   |          |        |          |        | 1.50E-02 | 3.427  | 1.00E00  | 1.468  |
| CLIP1    | CAP-GLY domain containing linker protein 1                  | 7.27E-01 | 1.138  | 8.90E-02 | -2.449 | 4.59E-03 | 1.901  | 5.89E-01 | 1.072  |
| CNN2     | calponin 2                                                  | 3.14E-02 | 1.550  | 3.23E-01 | 1.388  | 8.13E-04 | 1.753  | 6.26E-02 | 1.246  |
| CNPY2    | canopy FGF signaling regulator 2                            | 3.30E-01 | -1.142 | 1.91E-01 | -1.227 | 4.87E-02 | 1.708  | 8.21E-02 | 1.679  |
| COPS6    | COP9 signalosome subunit 6                                  | 1.00E00  | 0.000  | 1.00E00  | 0.000  | 5.68E-03 | -1.935 | 3.01E-05 | -2.304 |
| CRABP2   | cellular retinoic acid binding protein 2                    | 1.00E00  | 0.000  | 1.00E00  | 0.000  | 2.01E-02 | 10.196 | 5.80E-01 | 1.753  |
| CRKL     | v-crk avian sarcoma virus CT10 oncogene homolog-like        | 7.18E-01 | 1.127  | 9.97E-01 | 1.001  | 3.25E-02 | 2.215  | 7.70E-01 | 1.132  |
| CSK      | c-src tyrosine kinase                                       | 5.95E-03 | -1.902 | 3.88E-01 | -1.572 | 1.36E-02 | 1.380  | 1.62E-01 | -1.099 |
| CSNK1D   | casein kinase 1, delta                                      | 1.00E00  | 0.000  | 1.00E00  | 0.000  | 2.53E-02 | -1.754 | 4.94E-02 | -1.485 |
| CSTF2    | cleavage stimulation factor, 3' pre-RNA, subunit 2, 64kDa   | 7.34E-01 | -1.161 | 7.83E-01 | -1.222 | 1.17E-02 | -1.791 | 2.56E-01 | -1.242 |
| CTBP1    | C-terminal binding protein 1                                | 5.49E-01 | -1.175 | 5.46E-01 | 1.181  | 3.58E-02 | -1.525 | 2.73E-01 | -1.224 |
| CTSB     | cathepsin B                                                 | 9.68E-02 | 1.528  | 9.13E-01 | 1.055  | 1.55E-02 | 1.920  | 1.58E-01 | 1.368  |
| CUL1     | cullin 1                                                    | 1.00E00  | -3.027 | 1.00E00  | 2.030  | 3.57E-03 | -1.414 | 9.59E-01 | -1.002 |
| DCTN2    | dynactin 2 (p50)                                            | 3.07E-01 | 1.260  | 6.56E-01 | 1.180  | 7.02E-07 | 1.417  | 7.76E-02 | -1.068 |
| DDX58    | DEAD (Asp-Glu-Ala-Asp) box polypeptide 58                   |          |        |          |        | 2.50E-02 | 4.906  | 9.74E-01 | -1.016 |
| DPYSL2   | dihydropyrimidinase-like 2                                  | 3.59E-01 | -1.275 | 3.09E-01 | -1.991 | 2.49E-03 | 1.351  | 1.60E-01 | 1.083  |
| ECSIT    | ECSIT signalling integrator                                 | 1.00E00  | 0.000  | 1.00E00  | 0.000  | 1.41E-02 | -2.365 | 1.77E-02 | -2.634 |
| EIF3B    | eukaryotic translation initiation factor 3, subunit B       | 3.42E-01 | -1.386 | 8.48E-01 | 1.074  | 1.02E-02 | -1.676 | 2.12E-03 | -1.435 |
| EIF3C    | eukaryotic translation initiation factor 3, subunit C       | 5.73E-01 | -1.271 | 7.02E-01 | -1.177 | 9.18E-03 | -1.354 | 1.15E-01 | -1.170 |
| EIF3E    | eukaryotic translation initiation factor 3, subunit E       | 2.79E-01 | 1.270  | 5.54E-01 | -1.191 | 4.88E-02 | -1.981 | 2.96E-02 | -1.483 |
| EIF4A1   | eukaryotic translation initiation factor 4A1                | 2.22E-02 | -1.494 | 6.00E-01 | -1.108 | 5.36E-03 | -1.474 | 2.21E-03 | -1.518 |
| EIF4E3   | eukaryotic translation initiation factor 4E family member 3 |          |        |          |        | 4.31E-02 | 1.453  | 1.11E-01 | -1.372 |
| ELMO2    | engulfment and cell motility 2                              | 1.00E00  | 0.000  | 1.00E00  | 0.000  | 3.89E-02 | 1.267  | 5.69E-01 | -1.392 |
| ENO1     | enolase 1, (alpha)                                          | 3.39E-01 | 1.109  | 1.62E-01 | 1.484  | 6.46E-03 | -2.532 | 8.54E-03 | -2.414 |
| EP400    | E1A binding protein p400                                    | 1.00E00  | 0.000  | 1.00E00  | 0.000  | 5.27E-03 | 1.258  | 6.43E-01 | -1.248 |
| ERBB2IP  | erb2 interacting protein                                    | 1.00E00  | 0.000  | 1.00E00  | 1.288  | 4.08E-02 | 3.980  | 1.52E-01 | 2.284  |
| EZR      | ezrin                                                       | 4.70E-01 | 1.533  | 6.72E-01 | 1.354  | 3.55E-02 | 2.326  | 9.76E-01 | -1.012 |
| F3       | coagulation factor III (thromboplastin, tissue factor)      | 1.00E00  | 2.169  | 1.00E00  | 0.000  | 4.20E-03 | 4.412  | 3.68E-01 | 1.350  |
| FANCD2   | Fanconi anemia, complementation group D2                    | 1.00E00  | 0.000  | 1.00E00  | 0.000  | 2.87E-03 | 2.852  | 1.05E-01 | 2.113  |
| FAP      | fibroblast activation protein, alpha                        |          |        |          |        | 2.21E-02 | 13.090 | 1.00E00  |        |
| FHL1     | four and a half LIM domains 1                               |          |        |          |        | 2.10E-02 | -2.880 | 3.44E-02 | -1.783 |
| FKBP5    | FK506 binding protein 5                                     | 5.84E-01 | -1.202 | 5.13E-01 | 1.276  | 3.74E-03 | -1.378 | 2.37E-01 | 1.083  |

|              |                                                                                       |          |        |          |        |          |        |          |        |
|--------------|---------------------------------------------------------------------------------------|----------|--------|----------|--------|----------|--------|----------|--------|
| FPGS         | folylpolyglutamate synthase                                                           | 1.00E00  | 0.000  | 1.00E00  | 0.000  | 6.45E-03 | 4.414  | 7.01E-01 | -1.229 |
| FSCN1        | fascin actin-bundling protein 1                                                       | 7.47E-01 | 1.046  | 3.12E-01 | -1.807 | 2.35E-02 | -1.344 | 1.81E-02 | -1.349 |
| FXN          | frataxin                                                                              | 1.00E00  | 0.000  | 1.00E00  | 0.000  | 3.71E-04 | -1.877 | 1.48E-01 | -1.835 |
| G3BP1        | GTPase activating protein (SH3 domain) binding protein 1                              | 7.62E-01 | 1.162  | 9.59E-01 | 1.024  | 2.86E-02 | -1.388 | 2.53E-02 | -1.356 |
| G6PD         | glucose-6-phosphate dehydrogenase                                                     | 4.85E-01 | -1.477 | 8.33E-01 | -1.124 | 4.02E-02 | -1.406 | 8.21E-01 | -1.038 |
| GBP2         | guanylate binding protein 2, interferon-inducible                                     | 1.00E00  | 0.000  | 1.00E00  | 0.000  | 1.36E-02 | 2.228  | 1.29E-01 | -1.931 |
| GLDC         | glycine dehydrogenase (decarboxylating)                                               | 1.00E00  | 0.000  | 1.00E00  | 0.000  | 1.68E-02 | -2.631 | 5.56E-02 | 1.997  |
| GLRX         | glutaredoxin (thioltransferase)                                                       | 1.00E00  | 1.035  | 1.00E00  | -1.986 | 3.26E-02 | 2.976  | 2.46E-01 | -1.715 |
| GPX1         | glutathione peroxidase 1                                                              | 5.95E-01 | 1.428  | 6.56E-01 | 1.449  | 1.46E-02 | 1.273  | 1.51E-01 | 1.193  |
| GRB7         | growth factor receptor-bound protein 7                                                | 1.00E00  | 0.000  | 1.00E00  | 0.000  | 3.20E-02 | 1.867  | 1.00E00  | 1.058  |
| GRN          | granulin                                                                              |          |        |          |        | 7.46E-04 | 1.284  | 2.37E-01 | 1.124  |
| GSN          | gelsolin                                                                              | 4.22E-01 | 1.945  | 1.00E00  | -1.706 | 2.18E-03 | 1.703  | 1.23E-01 | -1.197 |
| GTF2I        | general transcription factor Iii                                                      | 2.48E-01 | -1.295 | 5.24E-01 | -1.528 | 5.99E-03 | -1.282 | 1.35E-02 | -1.186 |
| HDAC2        | histone deacetylase 2                                                                 | 1.00E00  | -3.841 | 1.00E00  | -1.241 | 4.63E-02 | -1.220 | 4.45E-01 | -1.123 |
| HDGFRP3      | hepatoma-derived growth factor, related protein 3                                     | 1.00E00  | 0.000  | 1.00E00  | 0.000  | 4.47E-02 | -2.817 | 4.36E-02 | -2.259 |
| HNRNPK       | heterogeneous nuclear ribonucleoprotein K                                             | 6.23E-01 | 1.079  | 6.77E-01 | 1.057  | 1.97E-02 | -1.205 | 3.08E-01 | -2.032 |
| HNRNPR       | heterogeneous nuclear ribonucleoprotein R                                             | 9.68E-01 | 1.014  | 6.88E-01 | 1.149  | 2.24E-03 | -1.249 | 3.83E-01 | -1.107 |
| HSP90AA1     | heat shock protein 90kDa alpha (cytosolic), class A member 1                          | 6.54E-01 | -1.196 | 9.28E-01 | -1.024 | 3.43E-02 | -1.335 | 1.36E-01 | -1.143 |
| HSPA8        | heat shock 70kDa protein 8                                                            | 7.91E-01 | 1.055  | 3.99E-01 | 1.176  | 4.62E-02 | -2.934 | 5.98E-01 | 2.678  |
| HSPA1A/HSP70 | heat shock 70kDa protein 1A                                                           | 1.43E-01 | 1.284  | 3.50E-01 | 1.333  | 2.34E-03 | -1.242 | 1.93E-01 | -1.064 |
| ICAM1        | intercellular adhesion molecule 1                                                     | 1.00E00  | 1.102  | 1.00E00  | 0.000  | 1.20E-02 | 4.093  | 4.97E-01 | -1.175 |
| IFI16        | interferon, gamma-inducible protein 16                                                | 9.19E-01 | -1.030 | 3.01E-01 | -1.441 | 4.97E-02 | 1.281  | 9.11E-01 | 1.012  |
| IKBKG        | inhibitor of kappa light polypeptide gene enhancer in B-cells, kinase gamma           | 1.00E00  | 1.673  | 1.00E00  | 1.769  | 5.03E-03 | 1.742  | 2.19E-01 | 1.327  |
| IL18         | interleukin 18                                                                        | 3.74E-01 | -1.508 | 6.32E-01 | -1.222 | 5.63E-03 | 1.981  | 1.43E-03 | 1.372  |
| IL1RN        | interleukin 1 receptor antagonist                                                     | 1.00E00  | 0.000  | 1.00E00  | 0.000  | 4.59E-02 | 5.796  | 2.60E-01 | 3.522  |
| ILKAP        | integrin-linked kinase-associated serine/threonine phosphatase                        | 1.00E00  | -1.000 | 1.00E00  | -1.490 | 4.27E-02 | -1.589 | 2.27E-01 | -1.253 |
| IMPDH1       | IMP (inosine 5'-monophosphate) dehydrogenase 1                                        | 4.14E-01 | -1.638 | 3.19E-01 | 1.312  | 3.17E-02 | -1.864 | 9.72E-01 | 1.006  |
| IMPDH2       | IMP (inosine 5'-monophosphate) dehydrogenase 2                                        | 4.36E-01 | -1.179 | 1.30E-01 | 1.633  | 3.88E-02 | -1.335 | 5.64E-01 | 1.060  |
| ITGA5        | integrin, alpha 5 (fibronectin receptor, alpha polypeptide)                           | 3.64E-01 | -2.172 | 1.00E00  | -3.726 | 4.33E-02 | -2.098 | 2.27E-02 | -2.119 |
| ITGB4        | integrin, beta 4                                                                      | 5.06E-01 | -1.180 | 7.55E-01 | -1.092 | 3.98E-02 | -1.164 | 1.00E00  | -1.292 |
| KEAP1        | kelch-like ECH-associated protein 1                                                   | 1.00E-01 | 1.388  | 1.00E00  | 0.000  | 4.76E-02 | 1.310  | 1.49E-01 | -1.211 |
| KLF13        | Kruppel-like factor 13                                                                |          |        |          |        | 2.56E-02 | -2.008 | 1.00E00  | -2.097 |
| LAMA5        | laminin, alpha 5                                                                      | 2.69E-01 | -2.706 | 1.00E00  | -3.277 | 1.45E-02 | -1.401 | 4.71E-02 | -2.294 |
| LAMB1        | laminin, beta 1                                                                       | 2.92E-02 | -2.479 | 1.00E00  | 1.431  | 1.80E-02 | -1.475 | 2.43E-01 | -1.522 |
| LARP1        | La ribonucleoprotein domain family, member 1                                          | 9.25E-01 | -1.031 | 7.45E-01 | 1.121  | 4.05E-02 | -1.338 | 2.63E-01 | -1.148 |
| LASP1        | LIM and SH3 protein 1                                                                 | 8.38E-01 | 1.067  | 2.15E-01 | -1.671 | 2.73E-02 | 1.248  | 8.94E-01 | -1.013 |
| LGALS3       | lectin, galactoside-binding, soluble, 3                                               | 2.19E-01 | 1.602  | 5.08E-01 | -1.695 | 1.83E-02 | 2.188  | 6.11E-01 | 1.139  |
| MAFF         | v-maf avian musculoaponeurotic fibrosarcoma oncogene homolog F                        | 1.00E00  | 0.000  | 1.00E00  | 0.000  | 6.53E-04 | 2.808  | 2.29E-01 | 1.384  |
| MAP2         | microtubule-associated protein 2                                                      | 1.00E00  | 0.000  | 1.00E00  | 0.000  | 1.21E-03 | 14.588 | 1.00E00  | 5.876  |
| MAP2K2       | mitogen-activated protein kinase kinase 2                                             | 1.00E00  | -1.030 | 1.00E00  | 1.079  | 2.57E-02 | -1.397 | 2.02E-02 | -1.306 |
| MCM2         | minichromosome maintenance complex component 2                                        | 2.17E-01 | -1.655 | 4.85E-01 | -1.317 | 2.09E-03 | -1.322 | 1.63E-01 | -1.166 |
| MCM3         | minichromosome maintenance complex component 3                                        | 8.46E-02 | -1.798 | 4.92E-01 | -1.091 | 4.82E-02 | -1.403 | 1.22E-01 | -1.283 |
| MCM5         | minichromosome maintenance complex component 5                                        | 1.04E-01 | -2.672 | 2.31E-01 | -2.414 | 4.21E-02 | -1.204 | 9.31E-01 | 1.006  |
| MET          | MET proto-oncogene, receptor tyrosine kinase                                          | 1.00E00  | 0.000  | 1.00E00  | 0.000  | 4.99E-02 | -1.277 | 6.91E-01 | 1.046  |
| MTHFD1       | methylenetetrahydrofolate dehydrogenase (NADP+ dependent) 1, methenyltetrahydrofolate | 8.02E-03 | -1.311 | 2.64E-01 | -1.172 | 1.29E-03 | -1.305 | 3.85E-01 | -1.071 |
| MVP          | major vault protein                                                                   | 1.50E-02 | 1.448  | 5.34E-01 | -1.110 | 3.14E-04 | 1.512  | 1.29E-01 | -1.259 |
| MYBBP1A      | MYB binding protein (P160) 1a                                                         | 1.16E-02 | -1.524 | 5.32E-01 | -1.070 | 3.38E-02 | -1.329 | 5.27E-02 | -1.161 |
| MYL9         | myosin, light chain 9, regulatory                                                     | 1.00E00  | 0.000  | 1.00E00  | 0.000  | 4.54E-02 | 3.181  | 1.00E00  | -1.094 |
| NASP         | nuclear autoantigenic sperm protein (histone-binding)                                 | 1.51E-01 | -2.073 | 2.57E-01 | -1.420 | 1.37E-02 | -1.205 | 7.64E-01 | 1.015  |

|          |                                                                                     |          |        |          |        |          |        |          |        |
|----------|-------------------------------------------------------------------------------------|----------|--------|----------|--------|----------|--------|----------|--------|
| NCK1     | NCK adaptor protein 1                                                               | 1.00E00  | 1.371  | 1.00E00  | 1.688  | 3.97E-03 | 1.850  | 3.49E-01 | 1.681  |
| NDE1     | nudE neurodevelopment protein 1                                                     | 4.11E-01 | 1.270  | 1.00E00  | 0.000  | 2.32E-03 | 2.586  | 9.40E-01 | 1.014  |
| NOLC1    | nucleolar and coiled-body phosphoprotein 1                                          | 5.80E-01 | 1.785  | 8.25E-01 | 1.283  | 4.09E-06 | -1.731 | 3.65E-02 | -8.090 |
| NT5C3A   | 5'-nucleotidase, cytosolic IIIA                                                     | 1.00E00  | -1.229 |          |        | 2.99E-02 | 1.600  | 1.99E-01 | 1.855  |
| ORC5     | origin recognition complex, subunit 5                                               |          |        |          |        | 2.19E-02 | -1.486 | 7.71E-02 | -1.196 |
| P4HA2    | prolyl 4-hydroxylase, alpha polypeptide II                                          | 1.22E-01 | 1.756  | 5.53E-01 | 1.271  | 3.82E-02 | -1.767 | 2.44E-02 | -1.820 |
| PACSIN2  | protein kinase C and casein kinase substrate in neurons 2                           | 4.88E-01 | -1.095 | 8.09E-01 | -1.092 | 3.43E-02 | -1.191 | 3.82E-02 | -1.199 |
| PAK1     | p21 protein (Cdc42/Rac)-activated kinase 1                                          |          |        |          |        | 3.34E-02 | -1.594 | 1.00E00  |        |
| PARP1    | poly (ADP-ribose) polymerase 1                                                      | 2.31E-01 | -1.364 | 4.50E-01 | -1.262 | 2.46E-03 | -1.234 | 3.58E-01 | 1.134  |
| PAWR     | PRKC, apoptosis, WT1, regulator                                                     | 1.00E00  | 1.098  | 1.00E00  | 0.000  | 7.64E-04 | 2.685  | 1.95E-01 | 1.444  |
| PDE4D    | phosphodiesterase 4D, cAMP-specific                                                 | 1.00E00  | 0.000  | 1.00E00  | 0.000  | 7.98E-03 | -3.140 | 1.15E-01 | -1.516 |
| PDK1     | pyruvate dehydrogenase kinase, isozyme 1                                            |          |        |          |        | 6.12E-03 | -1.794 | 6.34E-02 | -1.437 |
| PDXK     | pyridoxal (pyridoxine, vitamin B6) kinase                                           | 2.98E-01 | -1.704 | 8.37E-01 | -1.117 | 1.01E-02 | 1.757  | 2.94E-01 | 1.203  |
| PGRMC1   | progesterone receptor membrane component 1                                          | 8.46E-01 | 1.168  | 3.56E-01 | -2.648 | 1.94E-02 | -1.380 | 4.82E-02 | -1.261 |
| PHC3     | polyhomeotic homolog 3 (Drosophila)                                                 |          |        |          |        | 1.16E-02 | -1.614 | 1.00E00  | -1.017 |
| PHF6     | PHD finger protein 6                                                                | 1.00E00  | 0.000  | 1.00E00  | 0.000  | 2.84E-02 | -1.496 | 4.81E-01 | -1.107 |
| PKD1     | polycystic kidney disease 1 (autosomal dominant)                                    |          |        |          |        | 3.21E-02 | 1.598  | 1.83E-02 | 1.797  |
| PKHD1    | polycystic kidney and hepatic disease 1 (autosomal recessive)                       |          |        |          |        | 2.93E-02 | 2.475  | 6.49E-02 | 2.228  |
| PKM      | pyruvate kinase, muscle                                                             | 5.43E-01 | -1.856 | 1.00E00  | -1.791 | 4.20E-02 | -1.686 | 2.55E-01 | -1.288 |
| PLA2G4A  | phospholipase A2, group IVA (cytosolic, calcium-dependent)                          | 1.00E00  | 0.000  | 1.00E00  | 0.000  | 4.44E-02 | -1.379 | 3.22E-01 | 1.211  |
| POLR2H   | polymerase (RNA) II (DNA directed) polypeptide H                                    | 1.00E00  | -1.289 | 1.00E00  | -1.050 | 2.42E-02 | -1.731 | 3.23E-01 | -1.323 |
| PPAT     | phosphoribosyl pyrophosphate amidotransferase                                       | 5.21E-01 | -1.316 | 4.20E-01 | -1.097 | 4.83E-02 | 1.675  | 2.37E-01 | 1.608  |
| PPM1A    | protein phosphatase, Mg2+/Mn2+ dependent, 1A                                        | 1.00E00  | 3.041  | 1.00E00  | 0.000  | 1.54E-02 | -1.391 | 3.32E-01 | -1.153 |
| PPP1CC   | protein phosphatase 1, catalytic subunit, gamma isozyme                             | 1.00E00  | 0.000  | 1.00E00  | -3.795 | 3.37E-02 | 1.428  | 2.43E-03 | 1.450  |
| PPP1R10  | protein phosphatase 1, regulatory subunit 10                                        | 1.00E00  | -1.016 | 1.00E00  | 1.139  | 2.36E-02 | -1.314 | 6.81E-02 | -1.247 |
| PRDX4    | peroxiredoxin 4                                                                     | 2.51E-01 | -1.744 | 1.00E00  | -1.241 | 2.45E-02 | -1.501 | 3.44E-01 | -1.218 |
| PSMB10   | proteasome (prosome, macropain) subunit, beta type, 10                              | 1.00E00  | 0.000  | 1.00E00  | 0.000  | 1.03E-02 | 2.319  | 1.00E00  | -1.566 |
| PSMC2    | proteasome (prosome, macropain) 26S subunit, ATPase, 2                              | 9.94E-01 | -1.001 | 3.26E-01 | 1.152  | 1.89E-02 | 1.127  | 2.62E-03 | 1.287  |
| PTPN3    | protein tyrosine phosphatase, non-receptor type 3                                   |          |        |          |        | 2.54E-02 | 1.387  | 1.00E00  |        |
| RAC2     | ras-related C3 botulinum toxin substrate 2 (rho family, small GTP binding protein R | 1.00E00  | 0.000  | 1.00E00  | 0.000  | 1.04E-03 | 1.399  | 7.67E-02 | -1.210 |
| RAPH1    | Ras association (RalGDS/AF-6) and pleckstrin homology domains 1                     | 1.00E00  | -2.120 | 1.00E00  | 0.000  | 8.84E-03 | 2.205  | 1.00E00  | -1.481 |
| RB1CC1   | RB1-inducible coiled-coil 1                                                         | 1.00E00  | 0.000  | 1.00E00  | 0.000  | 3.58E-02 | 1.808  | 5.38E-02 | 1.256  |
| RBBP7    | retinoblastoma binding protein 7                                                    | 9.33E-01 | 1.031  | 7.44E-01 | 1.077  | 1.38E-02 | -3.281 | 6.28E-03 | -6.779 |
| RBX1     | ring-box 1, E3 ubiquitin protein ligase                                             | 1.00E00  | 0.000  | 1.00E00  | 0.000  | 2.30E-02 | -1.494 | 7.36E-01 | -1.081 |
| RGL2     | ral guanine nucleotide dissociation stimulator-like 2                               |          |        |          |        | 3.57E-02 | 1.957  | 1.00E00  |        |
| RPS6KA4  | ribosomal protein S6 kinase, 90kDa, polypeptide 4                                   | 1.00E00  | -1.026 | 1.00E00  | -1.418 | 2.13E-02 | -1.624 | 1.13E-01 | -1.257 |
| S100A4   | S100 calcium binding protein A4                                                     | 9.45E-01 | 1.096  | 3.90E-03 | 7.360  | 3.00E-02 | -1.797 | 1.74E-01 | 1.771  |
| S100A7   | S100 calcium binding protein A7                                                     | 1.00E00  | 0.000  | 1.00E00  | 0.000  | 1.46E-03 | 4.970  | 1.18E-01 | -2.276 |
| S100A11  | S100 calcium binding protein A11                                                    | 7.07E-01 | -1.259 | 7.38E-01 | -1.312 | 1.84E-03 | 1.639  | 6.48E-02 | 1.255  |
| S100P    | S100 calcium binding protein P                                                      | 1.00E00  | 0.000  | 1.00E00  | 0.000  | 1.45E-02 | 61.983 | 5.04E-01 | 2.709  |
| SAA1     | serum amyloid A1                                                                    | 1.00E00  | -1.394 | 1.00E00  | 10.687 | 2.30E-02 | 4.835  | 7.62E-02 | 3.014  |
| SCD5     | stearoyl-CoA desaturase 5                                                           | 1.00E00  | 0.000  | 1.00E00  | 0.000  | 1.86E-03 | 4.292  | 8.06E-01 | -1.127 |
| SERPINB2 | serpin peptidase inhibitor, clade B (ovalbumin), member 2                           | 1.00E00  | 0.000  | 1.00E00  | 0.000  | 4.57E-02 | 8.354  | 3.64E-01 | 1.973  |
| SF1      | splicing factor 1                                                                   | 7.79E-01 | -1.178 | 3.83E-01 | -1.619 | 4.35E-02 | -2.053 | 2.36E-01 | -1.544 |
| SF3B2    | splicing factor 3b, subunit 2, 145kDa                                               | 5.57E-01 | 1.231  | 4.54E-01 | 1.157  | 4.07E-02 | -1.251 | 1.39E-01 | -1.242 |
| SLC1A3   | solute carrier family 1 (glial high affinity glutamate transporter), member 3       | 1.00E00  | 0.000  | 1.00E00  | 0.000  | 1.05E-02 | 1.773  | 3.50E-01 | 1.439  |
| SLC35F6  | solute carrier family 35, member F6                                                 | 1.00E00  | 0.000  | 1.00E00  | 0.000  | 2.17E-02 | 2.283  | 7.38E-01 | -1.205 |
| SLPI     | secretory leukocyte peptidase inhibitor                                             |          |        |          |        | 1.03E-02 | 9.998  | 3.86E-01 | 1.397  |
| SMARCB1  | SWI/SNF related, matrix associated, actin dependent regulator of chromatin, subfa   | 1.00E00  | 0.000  | 1.00E00  | 0.000  | 1.38E-02 | -1.689 | 1.69E-01 | -1.220 |

|              |                                                                             |          |        |          |        |          |        |          |        |
|--------------|-----------------------------------------------------------------------------|----------|--------|----------|--------|----------|--------|----------|--------|
| SMYD3        | SET and MYND domain containing 3                                            | 1.00E00  | 0.000  | 1.00E00  | 0.000  | 1.27E-02 | -1.560 | 4.29E-01 | 1.101  |
| SND1         | staphylococcal nuclease and tudor domain containing 1                       | 4.51E-01 | -1.173 | 7.43E-01 | 1.075  | 2.77E-02 | -1.319 | 3.66E-01 | -1.094 |
| SNX3         | sorting nexin 3                                                             | 5.64E-01 | -1.325 | 9.25E-01 | 1.030  | 1.45E-02 | -1.306 | 4.88E-02 | -1.335 |
| SOD1         | superoxide dismutase 1, soluble                                             | 4.63E-01 | 2.670  | 7.65E-01 | 1.356  | 1.68E-02 | 2.011  | 6.23E-01 | -1.434 |
| SPTAN1       | spectrin, alpha, non-erythrocytic 1                                         | 5.03E-01 | 1.440  | 7.50E-01 | 1.140  | 8.59E-03 | -2.105 | 5.65E-01 | 1.132  |
| SPTBN1       | spectrin, beta, non-erythrocytic 1                                          | 2.24E-01 | -1.138 | 2.01E-02 | -1.613 | 7.98E-03 | 1.407  | 7.00E-01 | -1.251 |
| SRGAP2       | SLIT-ROBO Rho GTPase activating protein 2                                   | 1.00E00  | -1.391 | 1.00E00  | 0.000  | 4.23E-02 | 1.481  | 5.28E-01 | 1.125  |
| SRRT         | serrate, RNA effector molecule                                              | 7.55E-01 | -1.258 | 2.95E-01 | -2.175 | 4.81E-02 | -1.271 | 5.74E-01 | 1.054  |
| STARD13      | StAR-related lipid transfer (START) domain containing 13                    | 1.00E00  | 0.000  | 1.00E00  | 0.000  | 2.96E-02 | 1.725  | 5.80E-02 | -1.598 |
| STEAP3       | STEAP family member 3, metalloredutase                                      | 1.00E00  | 0.000  | 1.00E00  | 0.000  | 3.72E-02 | -4.257 | 1.00E00  | -3.302 |
| STK38L       | serine/threonine kinase 38 like                                             |          |        |          |        | 5.28E-03 | 1.529  | 1.95E-01 | -2.129 |
| STRAP        | serine/threonine kinase receptor associated protein                         | 4.66E-01 | -1.445 | 7.06E-01 | -1.186 | 2.65E-02 | -1.333 | 6.87E-03 | -1.382 |
| SUPV3L1      | suppressor of var1, 3-like 1 (S. cerevisiae)                                | 8.95E-01 | 1.038  | 5.81E-01 | 1.242  | 2.67E-02 | -1.578 | 2.31E-01 | 1.220  |
| SURF1        | surfeit 1                                                                   | 1.00E00  | 0.000  | 1.00E00  | 0.000  | 1.08E-02 | 2.147  | 5.18E-01 | -1.324 |
| TAB3         | TGF-beta activated kinase 1/MAP3K7 binding protein 3                        | 1.00E00  | 0.000  | 1.00E00  | 0.000  | 4.07E-02 | -2.665 | 8.68E-01 | -1.077 |
| TAGLN        | transgelin                                                                  | 2.67E-01 | 3.005  | 5.64E-01 | 1.918  | 3.32E-02 | 3.084  | 6.83E-01 | -1.179 |
| TBC1D8       | TBC1 domain family, member 8 (with GRAM domain)                             | 1.00E00  | 0.000  | 1.00E00  | 0.000  | 4.02E-02 | 7.103  | 1.89E-01 | 6.284  |
| TBK1         | TANK-binding kinase 1                                                       | 1.00E00  | 1.058  | 1.00E00  | 0.000  | 4.25E-02 | -1.305 | 3.19E-01 | -1.093 |
| TCEB3        | transcription elongation factor B (SIII), polypeptide 3 (110kDa, elongin A) | 8.17E-01 | 1.238  | 1.00E00  | 1.033  | 1.71E-02 | -2.843 | 5.92E-01 | -1.370 |
| TCF12        | transcription factor 12                                                     |          |        |          |        | 1.43E-02 | -1.871 | 1.00E00  | -2.456 |
| TCP1         | t-complex 1                                                                 | 2.91E-01 | -1.347 | 8.89E-01 | 1.042  | 2.03E-02 | -1.191 | 5.97E-01 | 1.028  |
| TFG          | TRK-fused gene                                                              | 3.41E-01 | -1.314 | 1.00E00  | -1.723 | 5.74E-03 | 2.478  | 1.40E-01 | 1.537  |
| THEM4        | thioesterase superfamily member 4                                           | 1.00E00  | -1.251 | 1.00E00  | 1.066  | 5.45E-03 | -1.605 | 6.83E-01 | -1.141 |
| TIMP1        | TIMP metalloproteinase inhibitor 1                                          | 8.12E-01 | 1.079  | 1.00E00  | -1.174 | 1.98E-02 | 1.741  | 9.21E-01 | 1.008  |
| TIMP3        | TIMP metalloproteinase inhibitor 3                                          | 1.00E00  | -2.697 | 1.00E00  | 0.000  | 4.13E-03 | -1.852 | 4.38E-01 | -1.628 |
| TJP1         | tight junction protein 1                                                    | 2.00E-01 | 1.561  | 7.48E-01 | -1.153 | 2.54E-02 | 1.457  | 6.26E-01 | -1.098 |
| TJP2         | tight junction protein 2                                                    | 9.86E-01 | -1.004 | 3.42E-01 | -1.502 | 1.24E-02 | 1.377  | 1.70E-01 | 1.164  |
| TJP3         | tight junction protein 3                                                    |          |        |          |        | 4.53E-02 | 2.144  | 5.41E-01 | 1.335  |
| TLR3         | toll-like receptor 3                                                        |          |        |          |        | 4.57E-02 | -1.300 | 4.35E-02 | -2.468 |
| TMSB10/TMSF1 | thymosin beta 10                                                            | 2.63E-01 | 3.370  | 2.81E-01 | 1.836  | 3.77E-02 | 5.288  | 7.55E-01 | -1.269 |
| TNS3         | tensin 3                                                                    | 1.00E00  | -1.941 | 1.00E00  | 0.000  | 2.92E-02 | -1.453 | 1.28E-01 | -1.159 |
| TOM1L1       | target of myb1 (chicken)-like 1                                             | 1.00E00  | 2.504  | 1.00E00  | 0.000  | 2.89E-02 | -1.651 | 7.87E-02 | -1.487 |
| TOP1MT       | topoisomerase (DNA) I, mitochondrial                                        |          |        |          |        | 3.86E-02 | 1.338  | 7.10E-02 | 2.347  |
| TPD52        | tumor protein D52                                                           | 3.64E-01 | -1.420 | 1.00E00  | 0.000  | 4.08E-02 | 2.962  | 3.36E-01 | 1.648  |
| TPD52L1      | tumor protein D52-like 1                                                    | 4.74E-02 | 1.692  | 3.73E-01 | 1.739  | 3.92E-02 | 2.140  | 8.26E-01 | 1.079  |
| TPM3         | tropomyosin 3                                                               | 2.84E-01 | 1.673  | 7.94E-01 | 1.192  | 4.80E-02 | 1.372  | 1.14E-01 | -2.110 |
| TRIM27       | tripartite motif containing 27                                              | 1.00E00  | 0.000  | 1.00E00  | 0.000  | 2.37E-02 | 1.677  | 3.69E-01 | 1.230  |
| TXNRD1       | thioredoxin reductase 1                                                     | 5.04E-01 | 1.560  | 9.93E-01 | 1.012  | 2.08E-02 | -2.032 | 9.20E-02 | -1.882 |
| UBE2I        | ubiquitin-conjugating enzyme E2I                                            | 1.38E-01 | -1.801 | 8.79E-02 | -1.654 | 1.19E-02 | -1.485 | 6.95E-02 | -1.283 |
| UBE2L3       | ubiquitin-conjugating enzyme E2L 3                                          | 9.58E-01 | -1.053 | 9.55E-01 | -1.079 | 1.42E-02 | 4.031  | 2.62E-01 | 1.810  |
| UNC93B1      | unc-93 homolog B1 (C. elegans)                                              | 1.00E00  | 0.000  | 1.00E00  | 0.000  | 3.29E-02 | -2.407 | 1.00E00  | -1.960 |
| VIM          | vimentin                                                                    | 9.23E-01 | -1.058 | 7.32E-01 | -1.226 | 9.94E-04 | -1.740 | 2.98E-02 | -1.433 |
| WDR6         | WD repeat domain 6                                                          | 1.00E00  | -1.574 | 1.00E00  | 0.000  | 2.82E-02 | -1.777 | 3.01E-02 | -2.105 |
| YBX3         | Y box binding protein 3                                                     | 6.81E-01 | 1.320  | 4.39E-01 | -1.621 | 3.77E-02 | -1.300 | 1.55E-02 | -1.410 |
| ZMYM2        | zinc finger, MYM-type 2                                                     |          |        |          |        | 2.60E-03 | -3.282 | 3.67E-03 | -4.371 |

**LMP2-with Inhs Proliferation of Cells (P = 3.35 x 10<sup>-6</sup>)**

| Symbol | Entrez Gene Name  | LMP1 no Inhs |             | LMP2 no Inhs |             | LMP1 with Inhs |             | LMP2 with Inhs |             |
|--------|-------------------|--------------|-------------|--------------|-------------|----------------|-------------|----------------|-------------|
|        |                   | p-value      | Fold Change | p-value      | Fold Change | p-value        | Fold Change | p-value        | Fold Change |
| ACLY   | ATP citrate lyase | 3.01E-01     | -1.500      | 9.17E-01     | 1.032       | 3.15E-02       | 1.159       | 3.79E-02       | 1.167       |

|             |                                                                                     |          |        |          |        |          |        |          |        |
|-------------|-------------------------------------------------------------------------------------|----------|--------|----------|--------|----------|--------|----------|--------|
| AGTRAP      | angiotensin II receptor-associated protein                                          | 1.00E00  | 0.000  | 1.00E00  | 0.000  | 2.73E-01 | -1.247 | 1.72E-02 | -1.592 |
| AKR1C1/AKR1 | aldo-keto reductase family 1, member C2                                             | 1.00E00  | 2.836  | 1.00E00  | -1.145 | 2.56E-01 | -1.795 | 1.29E-02 | 2.105  |
| ALOX15B     | arachidonate 15-lipoxygenase, type B                                                | 1.00E00  | 2.993  | 1.00E00  | 0.000  | 5.00E-02 | 4.297  | 3.11E-02 | 1.402  |
| ANXA6       | annexin A6                                                                          | 1.00E00  | 0.000  | 1.00E00  | 0.000  | 9.17E-01 | 1.062  | 3.45E-02 | -1.977 |
| API5        | apoptosis inhibitor 5                                                               | 6.53E-01 | 1.114  | 7.95E-01 | 1.234  | 8.46E-02 | -1.360 | 1.87E-02 | -1.382 |
| ATAT1       | alpha tubulin acetyltransferase 1                                                   | 1.00E00  | 0.000  | 1.00E00  | 0.000  | 1.00E00  | -1.707 | 3.77E-02 | 1.776  |
| ATF1        | activating transcription factor 1                                                   |          |        |          |        | 5.54E-01 | 1.108  | 3.67E-02 | 1.330  |
| ATP5B       | ATP synthase, H+ transporting, mitochondrial F1 complex, beta polypeptide           | 3.44E-01 | -1.221 | 8.35E-01 | 1.103  | 1.00E00  | -1.570 | 1.52E-02 | -2.313 |
| ATP6V0D1    | ATPase, H+ transporting, lysosomal 38kDa, V0 subunit d1                             | 1.00E00  | 0.000  | 1.00E00  | 0.000  | 3.25E-02 | 1.934  | 4.54E-02 | 1.720  |
| ATPIF1      | ATPase inhibitory factor 1                                                          | 1.00E00  | 3.577  | 1.00E00  | 6.682  | 1.86E-01 | -1.186 | 2.81E-03 | 1.617  |
| B4GALT1     | UDP-Gal:betaGlcNAc beta 1,4- galactosyltransferase, polypeptide 1                   | 1.00E00  | 0.000  | 1.00E00  | 0.000  | 9.51E-02 | 1.507  | 1.64E-02 | -1.201 |
| BCL2L11     | BCL2-like 11 (apoptosis facilitator)                                                |          |        |          |        | 2.64E-01 | -2.048 | 3.15E-02 | -1.593 |
| BPNT1       | 3'(2'), 5'-bisphosphate nucleotidase 1                                              | 8.47E-01 | 1.040  | 5.96E-01 | 1.109  | 7.85E-02 | 1.155  | 4.49E-02 | 1.199  |
| BRK1        | BRICK1, SCAR/WAVE actin-nucleating complex subunit                                  | 1.00E00  | 1.672  | 1.00E00  | 0.000  | 4.45E-01 | 1.045  | 2.15E-02 | -1.382 |
| C9orf78     | chromosome 9 open reading frame 78                                                  | 1.00E00  | 0.000  | 1.00E00  | 0.000  | 4.73E-02 | -1.681 | 1.18E-02 | -2.795 |
| CA12        | carbonic anhydrase XII                                                              | 1.00E00  | 0.000  | 1.00E00  | 0.000  | 5.84E-01 | -1.034 | 8.98E-03 | 2.884  |
| CBR1        | carbonyl reductase 1                                                                | 9.75E-01 | -1.004 | 1.50E-01 | 1.242  | 5.81E-01 | 1.061  | 1.39E-02 | 1.397  |
| CBX4        | chromobox homolog 4                                                                 | 1.00E00  | 0.000  | 1.00E00  | 0.000  | 5.50E-01 | -1.056 | 4.31E-02 | 1.425  |
| CCHCR1      | coiled-coil alpha-helical rod protein 1                                             |          |        |          |        | 3.59E-01 | 1.339  | 3.34E-02 | 1.914  |
| CD2AP       | CD2-associated protein                                                              | 6.28E-01 | 1.300  | 1.59E-01 | 2.012  | 8.76E-01 | 1.007  | 1.93E-02 | -1.208 |
| CDC27       | cell division cycle 27                                                              | 1.00E00  | 0.000  | 1.00E00  | 0.000  | 2.98E-01 | -1.452 | 1.10E-02 | -2.389 |
| CDKN1C      | cyclin-dependent kinase inhibitor 1C (p57, Kip2)                                    | 1.00E00  | 0.000  | 1.00E00  | 0.000  | 2.48E-01 | 1.536  | 4.13E-03 | -1.767 |
| CEBPD       | CCAAT/enhancer binding protein (C/EBP), delta                                       | 9.02E-02 | -1.547 | 2.94E-01 | -1.458 | 6.40E-01 | 1.213  | 3.42E-02 | 1.828  |
| CENPB       | centromere protein B, 80kDa                                                         | 1.00E00  | 0.000  | 1.00E00  | 0.000  | 7.29E-01 | 1.061  | 8.70E-03 | -1.487 |
| CHD4        | chromodomain helicase DNA binding protein 4                                         | 7.52E-01 | -1.213 | 7.10E-01 | 1.110  | 9.81E-02 | -1.276 | 4.86E-02 | -1.420 |
| CKS2        | CDC28 protein kinase regulatory subunit 2                                           |          |        |          |        | 9.88E-02 | 1.622  | 2.27E-02 | 1.783  |
| CLCA2       | chloride channel accessory 2                                                        | 3.87E-01 | -1.357 | 1.00E00  | -2.046 | 7.82E-01 | -1.084 | 1.99E-02 | 2.104  |
| COPS6       | COP9 signalosome subunit 6                                                          | 1.00E00  | 0.000  | 1.00E00  | 0.000  | 5.68E-03 | -1.935 | 3.01E-05 | -2.304 |
| CSNK1D      | casein kinase 1, delta                                                              | 1.00E00  | 0.000  | 1.00E00  | 0.000  | 2.53E-02 | -1.754 | 4.94E-02 | -1.485 |
| CYR61       | cysteine-rich, angiogenic inducer, 61                                               | 1.00E00  | 0.000  | 1.00E00  | 0.000  | 4.67E-01 | -1.418 | 9.40E-03 | -2.249 |
| DAB2IP      | DAB2 interacting protein                                                            | 1.00E00  | 0.000  | 1.00E00  | 0.000  | 1.99E-01 | 1.401  | 3.60E-02 | -1.565 |
| DHCR24      | 24-dehydrocholesterol reductase                                                     | 1.00E00  | 0.000  | 1.00E00  | 0.000  | 2.07E-01 | 1.410  | 7.50E-03 | -1.884 |
| DNAJA1      | DnaJ (Hsp40) homolog, subfamily A, member 1                                         | 2.81E-01 | 1.344  | 9.41E-01 | -1.020 | 1.21E-01 | -1.493 | 5.00E-02 | -1.763 |
| DYRK1A      | dual-specificity tyrosine-(Y)-phosphorylation regulated kinase 1A                   |          |        |          |        | 7.80E-02 | -1.271 | 3.54E-02 | -1.395 |
| ECSIT       | ECSIT signalling integrator                                                         | 1.00E00  | 0.000  | 1.00E00  | 0.000  | 1.41E-02 | -2.365 | 1.77E-02 | -2.634 |
| EEF1D       | eukaryotic translation elongation factor 1 delta (guanine nucleotide exchange prote | 6.47E-01 | 1.485  | 5.90E-01 | 1.601  | 1.17E-01 | -1.375 | 8.67E-03 | 3.326  |
| EI24        | etoposide induced 2.4                                                               | 1.00E00  | -3.013 | 1.00E00  | 0.000  | 9.20E-01 | 1.041  | 4.92E-02 | -2.038 |
| EIF5        | eukaryotic translation initiation factor 5                                          | 3.46E-01 | 1.602  | 6.89E-01 | 1.275  | 1.22E-01 | -1.603 | 4.54E-02 | -1.458 |
| EIF3B       | eukaryotic translation initiation factor 3, subunit B                               | 3.42E-01 | -1.386 | 8.48E-01 | 1.074  | 1.02E-02 | -1.676 | 2.12E-03 | -1.435 |
| EIF3E       | eukaryotic translation initiation factor 3, subunit E                               | 2.79E-01 | 1.270  | 5.54E-01 | -1.191 | 4.88E-02 | -1.981 | 2.96E-02 | -1.483 |
| EIF4A1      | eukaryotic translation initiation factor 4A1                                        | 2.22E-02 | -1.494 | 6.00E-01 | -1.108 | 5.36E-03 | -1.474 | 2.21E-03 | -1.518 |
| ENO1        | enolase 1, (alpha)                                                                  | 3.39E-01 | 1.109  | 1.62E-01 | 1.484  | 6.46E-03 | -2.532 | 8.54E-03 | -2.414 |
| ERCC2       | excision repair cross-complementation group 2                                       | 1.00E00  | 0.000  | 1.00E00  | 0.000  | 9.09E-01 | 1.060  | 4.97E-02 | 1.761  |
| EXOC5       | exocyst complex component 5                                                         | 1.00E00  | 0.000  | 1.00E00  | 0.000  | 1.52E-01 | -1.403 | 1.07E-02 | -2.131 |
| FAS         | Fas cell surface death receptor                                                     | 1.00E00  | -1.102 | 1.00E00  | 0.000  | 1.24E-01 | -1.230 | 3.08E-03 | -1.720 |
| FHL1        | four and a half LIM domains 1                                                       |          |        |          |        | 2.10E-02 | -2.880 | 3.44E-02 | -1.783 |
| FMR1        | fragile X mental retardation 1                                                      | 7.18E-02 | -2.219 | 3.05E-01 | -1.654 | 3.63E-01 | -1.454 | 3.98E-02 | -1.650 |
| FSCN1       | fascin actin-bundling protein 1                                                     | 7.47E-01 | 1.046  | 3.12E-01 | -1.807 | 2.35E-02 | -1.344 | 1.81E-02 | -1.349 |
| G3BP1       | GTPase activating protein (SH3 domain) binding protein 1                            | 7.62E-01 | 1.162  | 9.59E-01 | 1.024  | 2.86E-02 | -1.388 | 2.53E-02 | -1.356 |

|           |                                                                      |          |        |          |        |          |        |          |        |
|-----------|----------------------------------------------------------------------|----------|--------|----------|--------|----------|--------|----------|--------|
| GALNS     | galactosamine (N-acetyl)-6-sulfatase                                 | 1.00E00  | 0.000  | 1.00E00  | 0.000  | 6.33E-01 | -1.127 | 1.59E-02 | -2.250 |
| GALNT2    | polypeptide N-acetylgalactosaminyltransferase 2                      | 5.04E-01 | -1.913 | 1.00E00  | -3.062 | 1.15E-01 | -1.612 | 1.00E-02 | -3.197 |
| GPHN      | gephyrin                                                             | 3.38E-01 | 1.207  | 1.00E00  | 1.016  | 3.95E-01 | 1.581  | 3.82E-02 | 3.456  |
| GTF2I     | general transcription factor Iii                                     | 2.48E-01 | -1.295 | 5.24E-01 | -1.528 | 5.99E-03 | -1.282 | 1.35E-02 | -1.186 |
| H2AFX     | H2A histone family, member X                                         | 8.16E-01 | -1.078 | 9.95E-01 | 1.009  | 8.35E-01 | 1.046  | 4.72E-02 | 1.489  |
| HDGFRP3   | hepatoma-derived growth factor, related protein 3                    | 1.00E00  | 0.000  | 1.00E00  | 0.000  | 4.47E-03 | -2.817 | 4.36E-02 | -2.259 |
| HMMR      | hyaluronan-mediated motility receptor (RHAMM)                        | 1.00E00  | 0.000  | 1.00E00  | 0.000  | 1.00E00  | -3.729 | 2.60E-02 | -3.481 |
| HNRNPA2B1 | heterogeneous nuclear ribonucleoprotein A2/B1                        | 3.72E-01 | -1.186 | 9.16E-01 | 1.021  | 7.09E-02 | -1.330 | 2.14E-02 | 2.533  |
| IGBP1     | immunoglobulin (CD79A) binding protein 1                             | 8.70E-01 | -1.056 | 1.00E00  | -1.076 | 2.00E-01 | -1.267 | 7.97E-03 | -1.947 |
| IGF2BP3   | insulin-like growth factor 2 mRNA binding protein 3                  | 7.30E-01 | 1.216  | 3.56E-03 | -1.963 | 5.05E-01 | -1.102 | 1.29E-02 | -2.325 |
| IL18      | interleukin 18                                                       | 3.74E-01 | -1.508 | 6.32E-01 | -1.222 | 5.63E-03 | 1.981  | 1.43E-03 | 1.372  |
| INPP5K    | inositol polyphosphate-5-phosphatase K                               |          |        |          |        | 3.88E-01 | 1.251  | 3.46E-02 | -1.270 |
| ITGA5     | integrin, alpha 5 (fibronectin receptor, alpha polypeptide)          | 3.64E-01 | -2.172 | 1.00E00  | -3.726 | 4.33E-02 | -2.098 | 2.27E-02 | -2.119 |
| KANK2     | KN motif and ankyrin repeat domains 2                                | 1.00E00  | 0.000  | 1.00E00  | 0.000  | 8.80E-02 | -1.928 | 6.18E-03 | -2.708 |
| KIF15     | kinesin family member 15                                             | 1.00E00  | 0.000  | 1.00E00  | 0.000  | 6.96E-01 | 1.255  | 3.44E-02 | 1.374  |
| LAMA5     | laminin, alpha 5                                                     | 2.69E-01 | -2.706 | 1.00E00  | -3.277 | 1.45E-02 | -1.401 | 4.71E-02 | -2.294 |
| LAMB2     | laminin, beta 2 (laminin S)                                          | 1.00E00  | 0.000  | 1.00E00  | 0.000  | 9.33E-02 | 1.599  | 3.25E-02 | 1.709  |
| LIMA1     | LIM domain and actin binding 1                                       | 1.68E-01 | 1.738  | 6.78E-01 | 1.140  | 1.00E00  | 1.439  | 1.59E-03 | 1.192  |
| MAGED2    | melanoma antigen family D, 2                                         | 1.00E00  | 0.000  | 1.00E00  | 0.000  | 2.86E-01 | -1.460 | 4.14E-02 | -2.129 |
| MAP2K2    | mitogen-activated protein kinase kinase 2                            | 1.00E00  | -1.030 | 1.00E00  | 1.079  | 2.57E-02 | -1.397 | 2.02E-02 | -1.306 |
| MBD1      | methyl-CpG binding domain protein 1                                  | 1.00E00  | 0.000  | 1.00E00  | 0.000  | 3.34E-01 | -1.117 | 2.46E-03 | -1.734 |
| MCAM      | melanoma cell adhesion molecule                                      |          |        |          |        | 5.91E-01 | 1.219  | 3.11E-02 | 1.409  |
| MCFD2     | multiple coagulation factor deficiency 2                             | 1.00E00  | 0.000  | 1.00E00  | 0.000  | 5.04E-02 | 2.420  | 3.80E-02 | 2.469  |
| MCM7      | minichromosome maintenance complex component 7                       | 2.36E-01 | -1.658 | 1.82E-01 | -1.311 | 1.73E-01 | -1.253 | 4.74E-02 | -1.355 |
| MORC3     | MORC family CW-type zinc finger 3                                    | 1.00E00  | 0.000  | 1.00E00  | 0.000  | 4.95E-01 | -1.263 | 1.13E-02 | -2.036 |
| MSI2      | musashi RNA-binding protein 2                                        | 1.00E00  | 1.317  | 1.00E00  | 1.552  | 1.00E00  | -1.322 | 1.95E-02 | -1.841 |
| MYCBP     | MYC binding protein                                                  | 1.00E00  | -1.266 | 1.00E00  | -1.433 | 1.96E-01 | 1.464  | 4.50E-02 | -1.363 |
| NFKB1     | nuclear factor of kappa light polypeptide gene enhancer in B-cells 1 | 7.54E-01 | -1.280 | 8.35E-01 | 1.177  | 9.42E-02 | 1.205  | 1.63E-02 | 1.226  |
| NOLC1     | nucleolar and coiled-body phosphoprotein 1                           | 5.80E-01 | 1.785  | 8.25E-01 | 1.283  | 4.09E-06 | -1.731 | 3.65E-02 | -8.090 |
| NPM1      | nucleophosmin (nucleolar phosphoprotein B23, numatrin)               | 3.04E-01 | -1.476 | 1.10E-01 | -1.239 | 2.68E-01 | -1.670 | 1.58E-02 | 1.215  |
| OGT       | O-linked N-acetylglucosamine (GlcNAc) transferase                    | 4.88E-01 | 1.135  | 9.90E-01 | 1.007  | 9.40E-01 | 1.015  | 2.70E-02 | -1.424 |
| P4HA2     | prolyl 4-hydroxylase, alpha polypeptide II                           | 1.22E-01 | 1.756  | 5.53E-01 | 1.271  | 3.82E-02 | -1.767 | 2.44E-02 | -1.820 |
| PACSIN2   | protein kinase C and casein kinase substrate in neurons 2            | 4.88E-01 | -1.095 | 8.09E-01 | -1.092 | 3.43E-02 | -1.191 | 3.82E-02 | -1.199 |
| PCYT1A    | phosphate cytidyltransferase 1, choline, alpha                       | 1.00E00  | -1.189 | 1.00E00  | 1.122  | 9.14E-02 | -1.214 | 2.16E-03 | -1.463 |
| PELO      | pelota homolog (Drosophila)                                          | 1.00E00  | 0.000  | 1.00E00  | 0.000  | 7.19E-01 | -1.076 | 4.25E-02 | -1.640 |
| PFKP      | phosphofructokinase, platelet                                        | 2.67E-01 | -1.420 | 1.07E-01 | -1.426 | 2.00E-01 | -1.247 | 4.26E-02 | -1.148 |
| PGRMC1    | progesterone receptor membrane component 1                           | 8.46E-01 | 1.168  | 3.56E-01 | -2.648 | 1.94E-02 | -1.380 | 4.82E-02 | -1.261 |
| PKD1      | polycystic kidney disease 1 (autosomal dominant)                     |          |        |          |        | 3.21E-02 | 1.598  | 1.83E-02 | 1.797  |
| PLEC      | plectin                                                              |          |        |          |        | 1.00E00  | -3.095 | 3.74E-03 | 3.622  |
| PLXNA4    | plexin A4                                                            |          |        |          |        | 3.17E-01 | -1.142 | 3.87E-03 | -3.151 |
| PML       | promyelocytic leukemia                                               | 4.01E-01 | -1.174 | 2.33E-02 | -2.367 | 7.11E-01 | 1.114  | 4.66E-02 | -1.449 |
| PNP       | purine nucleoside phosphorylase                                      | 1.61E-01 | 1.495  | 9.39E-01 | -1.053 | 8.46E-01 | -1.029 | 4.98E-02 | -1.793 |
| POLB      | polymerase (DNA directed), beta                                      | 1.00E00  | 1.219  | 1.00E00  | 0.000  | 2.14E-01 | -1.677 | 4.88E-02 | -1.640 |
| PPP1CC    | protein phosphatase 1, catalytic subunit, gamma isozyme              | 1.00E00  | 0.000  | 1.00E00  | -3.795 | 3.37E-02 | 1.428  | 2.43E-03 | 1.450  |
| PPP1R13L  | protein phosphatase 1, regulatory subunit 13 like                    | 4.18E-01 | 1.766  | 3.18E-01 | -1.383 | 3.89E-01 | 1.170  | 4.07E-02 | -1.352 |
| PPP3R1    | protein phosphatase 3, regulatory subunit B, alpha                   | 1.00E00  | 0.000  | 1.00E00  | 0.000  | 1.33E-01 | -1.373 | 1.02E-02 | -1.585 |
| PSMC2     | proteasome (prosome, macropain) 26S subunit, ATPase, 2               | 9.94E-01 | -1.001 | 3.26E-01 | 1.152  | 1.89E-02 | 1.127  | 2.62E-03 | 1.287  |
| PSMD2     | proteasome (prosome, macropain) 26S subunit, non-ATPase, 2           | 5.38E-03 | 1.171  | 1.21E-01 | 1.472  | 2.87E-01 | -1.067 | 2.70E-02 | -1.227 |
| PTPN12    | protein tyrosine phosphatase, non-receptor type 12                   | 9.20E-02 | 2.137  | 1.80E-01 | 1.541  | 3.56E-01 | -1.087 | 2.47E-02 | -1.305 |



|          |                                                                                |          |        |          |        |          |        |          |         |
|----------|--------------------------------------------------------------------------------|----------|--------|----------|--------|----------|--------|----------|---------|
| PXN      | paxillin                                                                       | 2.26E-01 | 1.287  | 1.27E-01 | -1.543 | 3.24E-01 | 1.546  | 1.68E-02 | -1.271  |
| RAD9A    | RAD9 homolog A (S. pombe)                                                      | 1.00E00  | 0.000  | 1.00E00  | 0.000  | 3.19E-01 | -1.244 | 3.39E-02 | -1.702  |
| RBBP7    | retinoblastoma binding protein 7                                               | 9.33E-01 | 1.031  | 7.44E-01 | 1.077  | 1.38E-02 | -3.281 | 6.28E-03 | -6.779  |
| RBBP9    | retinoblastoma binding protein 9                                               | 1.00E00  | 0.000  | 1.00E00  | 0.000  | 1.12E-01 | -1.520 | 9.16E-03 | -3.018  |
| RHEB     | Ras homolog enriched in brain                                                  | 1.00E00  | 0.000  | 1.00E00  | 0.000  | 4.60E-01 | -1.640 | 3.30E-02 | -1.975  |
| RIPK1    | receptor (TNFRSF)-interacting serine-threonine kinase 1                        | 1.00E00  | 0.000  | 1.00E00  | 0.000  | 3.61E-01 | 1.444  | 3.39E-03 | -1.610  |
| RNASEH2B | ribonuclease H2, subunit B                                                     | 1.00E00  | 0.000  | 1.00E00  | 0.000  | 1.59E-01 | 1.209  | 1.02E-02 | 1.960   |
| RPL26    | ribosomal protein L26                                                          | 6.22E-01 | -1.402 | 8.23E-01 | 1.176  | 5.30E-01 | 1.102  | 1.21E-02 | 1.300   |
| RPS15A   | ribosomal protein S15a                                                         | 6.98E-02 | -1.702 | 3.15E-01 | -1.182 | 9.19E-01 | -1.093 | 2.40E-03 | 1.238   |
| RPS6KB1  | ribosomal protein S6 kinase, 70kDa, polypeptide 1                              | 1.00E00  | 1.861  | 1.00E00  | 1.983  | 1.04E-01 | -1.675 | 3.62E-02 | -1.878  |
| RSL1D1   | ribosomal L1 domain containing 1                                               | 3.79E-01 | -1.525 | 6.53E-01 | 1.254  | 9.58E-01 | -1.005 | 4.30E-02 | 1.264   |
| RTN4     | reticulon 4                                                                    | 7.07E-01 | -1.774 | 1.00E00  | -1.053 | 6.29E-02 | 1.171  | 8.41E-03 | -1.397  |
| SCAF11   | SR-related CTD-associated factor 11                                            | 1.00E00  | 0.000  | 1.00E00  | 0.000  | 7.35E-02 | -1.303 | 2.09E-02 | -1.508  |
| SCAMP2   | secretory carrier membrane protein 2                                           | 1.00E00  | -1.884 | 1.00E00  | 0.000  | 7.57E-01 | -1.075 | 8.07E-03 | -2.146  |
| SDCBP    | syndecan binding protein (syntenin)                                            | 2.20E-01 | -1.488 | 1.69E-01 | -2.287 | 2.44E-01 | -1.103 | 2.26E-03 | -1.420  |
| SLC3A2   | solute carrier family 3 (amino acid transporter heavy chain), member 2         | 1.88E-01 | -1.396 | 9.50E-01 | -1.051 | 3.39E-01 | -1.430 | 3.13E-02 | 1.445   |
| SMAD2    | SMAD family member 2                                                           | 9.07E-01 | -1.022 | 1.00E00  | -1.036 | 3.94E-01 | 1.118  | 3.74E-02 | -1.304  |
| SNX3     | sorting nexin 3                                                                | 5.64E-01 | -1.325 | 9.25E-01 | 1.030  | 1.45E-02 | -1.306 | 4.88E-02 | -1.335  |
| STAU1    | staufen double-stranded RNA binding protein 1                                  | 2.56E-01 | 1.342  | 4.38E-01 | 1.344  | 4.04E-01 | 1.111  | 3.33E-02 | -1.379  |
| STIM1    | stromal interaction molecule 1                                                 | 1.00E00  | 0.000  | 1.00E00  | 0.000  | 4.59E-01 | 1.167  | 3.48E-02 | -1.984  |
| STRAP    | serine/threonine kinase receptor associated protein                            | 4.66E-01 | -1.445 | 7.06E-01 | -1.186 | 2.65E-02 | -1.333 | 6.87E-03 | -1.382  |
| SYNM     | synemin, intermediate filament protein                                         |          |        |          |        | 5.28E-01 | -1.141 | 1.52E-03 | -2.020  |
| TAF4     | TAF4 RNA polymerase II, TATA box binding protein (TBP)-associated factor, 135k | 1.00E00  | 0.000  | 1.00E00  | 0.000  | 8.06E-01 | -1.053 | 4.00E-02 | -1.449  |
| TAF9     | TAF9 RNA polymerase II, TATA box binding protein (TBP)-associated factor, 32kD |          |        | 1.00E00  | 1.159  | 6.24E-01 | -1.180 | 4.79E-03 | -1.507  |
| TGM2     | transglutaminase 2                                                             | 1.00E00  | 1.933  | 1.00E00  | 0.000  | 5.35E-01 | 1.128  | 1.79E-03 | -3.500  |
| TLN1     | talin 1                                                                        | 6.90E-01 | 1.081  | 1.64E-01 | -1.316 | 7.06E-02 | 1.063  | 2.74E-02 | -1.154  |
| TLR3     | toll-like receptor 3                                                           |          |        |          |        | 4.57E-02 | -1.300 | 4.35E-02 | -2.468  |
| TOE1     | target of EGR1, member 1 (nuclear)                                             | 1.00E00  | 0.000  | 1.00E00  | 0.000  | 5.20E-02 | -1.797 | 4.99E-02 | -2.612  |
| TPX2     | TPX2, microtubule-associated                                                   |          |        |          |        | 7.32E-02 | -7.719 | 3.53E-02 | -19.498 |
| TRAF6    | TNF receptor-associated factor 6, E3 ubiquitin protein ligase                  | 1.00E00  | 0.000  | 1.00E00  | 0.000  | 1.29E-01 | -1.539 | 5.71E-03 | -1.943  |
| TRAP1    | TNF receptor-associated protein 1                                              | 3.42E-01 | -1.458 | 8.55E-01 | -1.022 | 2.57E-01 | -1.143 | 2.79E-02 | 1.389   |
| TSC22D1  | TSC22 domain family, member 1                                                  | 1.00E00  | 0.000  | 1.00E00  | 0.000  | 1.00E00  | -3.302 | 2.90E-02 | -3.960  |
| UBA1     | ubiquitin-like modifier activating enzyme 1                                    | 3.03E-01 | -1.249 | 6.97E-01 | -1.154 | 6.85E-01 | -1.019 | 2.85E-03 | -1.117  |
| UBE2C    | ubiquitin-conjugating enzyme E2C                                               | 1.00E00  | 0.000  | 1.00E00  | 0.000  | 1.91E-01 | -1.937 | 1.21E-02 | -5.242  |
| UBE2L6   | ubiquitin-conjugating enzyme E2L 6                                             | 1.00E00  | 0.000  | 1.00E00  | 0.000  | 8.02E-01 | 1.172  | 2.87E-02 | -2.430  |
| VIM      | vimentin                                                                       | 9.23E-01 | -1.058 | 7.32E-01 | -1.226 | 9.94E-04 | -1.740 | 2.98E-02 | -1.433  |
| WDR6     | WD repeat domain 6                                                             | 1.00E00  | -1.574 | 1.00E00  | 0.000  | 2.82E-02 | -1.777 | 3.01E-02 | -2.105  |
| YBX3     | Y box binding protein 3                                                        | 6.81E-01 | 1.320  | 4.39E-01 | -1.621 | 3.77E-02 | -1.300 | 1.55E-02 | -1.410  |
| YME1L1   | YME1-like 1 ATPase                                                             | 4.45E-01 | -1.282 | 1.00E00  | -1.083 | 1.73E-01 | -1.302 | 3.74E-03 | -2.148  |
| YTHDF2   | YTH domain family, member 2                                                    | 1.00E00  | 1.084  | 1.00E00  | 0.000  | 5.38E-02 | -1.811 | 3.83E-02 | -1.567  |
| ZMYM2    | zinc finger, MYM-type 2                                                        |          |        |          |        | 2.60E-03 | -3.282 | 3.67E-03 | -4.371  |

**LMP1-no Inhibitors: Cell death of Tumor Cell lines (P = 0.00018)**

| Symbol   | Entrez Gene Name                                                       | LMP1 no Inhs |             | LMP2 no Inhs |             | LMP1 with Inhs |             | LMP2 with Inhs |             |
|----------|------------------------------------------------------------------------|--------------|-------------|--------------|-------------|----------------|-------------|----------------|-------------|
|          |                                                                        | p-value      | Fold Change | p-value      | Fold Change | p-value        | Fold Change | p-value        | Fold Change |
| ACACA    | acetyl-CoA carboxylase alpha                                           | 1.81E-02     | -2.870      | 2.91E-01     | -1.911      | 8.33E-01       | 1.051       | 9.42E-01       | -1.014      |
| CAPN1    | calpain 1, (mu/I) large subunit                                        | 4.38E-02     | -1.239      | 9.13E-01     | 1.017       | 1.09E-01       | 1.277       | 8.11E-01       | 1.037       |
| CAPNS1   | calpain, small subunit 1                                               | 1.07E-02     | 1.386       | 1.35E-01     | 1.316       | 2.97E-01       | 1.078       | 1.28E-01       | -1.125      |
| CHTOP    | chromatin target of PRMT1                                              | 1.98E-02     | -1.944      | 1.10E-02     | -1.675      | 1.13E-01       | 1.392       | 4.44E-02       | 1.757       |
| CNN2     | calponin 2                                                             | 3.14E-02     | 1.550       | 3.23E-01     | 1.388       | 8.13E-04       | 1.753       | 6.26E-02       | 1.246       |
| EIF2AK2  | eukaryotic translation initiation factor 2-alpha kinase 2              | 3.04E-02     | -1.756      | 5.90E-01     | 1.081       | 5.77E-01       | -1.088      | 3.84E-01       | -1.125      |
| EIF2B4   | eukaryotic translation initiation factor 2B, subunit 4 delta, 67kDa    | 1.95E-02     | 1.233       | 1.00E00      | 1.446       | 3.35E-01       | -1.208      | 5.09E-01       | -1.133      |
| ETHE1    | ethylmalonic encephalopathy 1                                          | 3.43E-02     | 2.076       | 6.88E-01     | 1.082       | 2.01E-02       | 1.558       | 6.43E-01       | -1.084      |
| HK1      | hexokinase 1                                                           | 3.25E-03     | -1.363      | 2.59E-01     | -1.360      | 5.00E-02       | -1.264      | 8.03E-01       | 1.025       |
| HSPB1    | heat shock 27kDa protein 1                                             | 1.20E-02     | 3.427       | 2.30E-01     | 1.936       | 2.29E-01       | 1.449       | 9.29E-01       | -1.043      |
| ILF2     | interleukin enhancer binding factor 2                                  | 4.35E-02     | -1.524      | 7.87E-01     | 1.098       | 5.75E-01       | -1.092      | 8.51E-01       | -1.031      |
| KRT18    | keratin 18                                                             | 1.12E-02     | -1.391      | 3.43E-01     | -1.225      | 2.47E-01       | 1.202       | 3.85E-01       | 1.150       |
| LIG3     | ligase III, DNA, ATP-dependent                                         | 1.98E-02     | -2.267      | 1.00E00      | -1.304      | 2.61E-01       | 1.431       | 2.63E-01       | 1.433       |
| MVP      | major vault protein                                                    | 1.50E-02     | 1.448       | 5.34E-01     | -1.110      | 3.14E-04       | 1.512       | 1.29E-01       | -1.259      |
| NDRG1    | N-myc downstream regulated 1                                           | 1.89E-04     | 2.066       | 3.24E-02     | 2.279       | 2.95E-01       | -1.325      | 1.22E-01       | 1.474       |
| PCNA     | proliferating cell nuclear antigen                                     | 1.39E-02     | -1.567      | 8.60E-01     | -1.042      | 1.07E-01       | -1.523      | 8.93E-02       | -1.434      |
| PHB      | prohibitin                                                             | 2.29E-02     | 1.435       | 2.84E-01     | 1.437       | 7.44E-01       | 1.094       | 4.09E-01       | 1.192       |
| PRKCDBP  | protein kinase C, delta binding protein                                | 2.12E-02     | 2.481       | 3.25E-01     | 2.001       | 3.10E-01       | 2.533       | 6.45E-01       | 1.506       |
| PSMD2    | proteasome (prosome, macropain) 26S subunit, non-ATPase, 2             | 5.38E-03     | 1.171       | 1.21E-01     | 1.472       | 2.87E-01       | -1.067      | 2.70E-02       | -1.227      |
| SERPINB5 | serpin peptidase inhibitor, clade B (ovalbumin), member 5              | 1.15E-02     | 1.984       | 9.97E-02     | 1.719       | 5.35E-01       | 1.261       | 5.81E-01       | 1.299       |
| SFN      | stratifin                                                              | 3.53E-02     | 2.029       | 2.01E-01     | 1.754       | 2.44E-01       | -1.200      | 6.46E-01       | -1.123      |
| THOC1    | THO complex 1                                                          | 7.01E-03     | -2.126      | 1.00E00      | -2.396      | 3.57E-01       | -1.181      | 8.65E-01       | 1.021       |
| TOP1     | topoisomerase (DNA) I                                                  | 4.71E-02     | -1.434      | 6.68E-01     | -1.064      | 2.27E-01       | -1.276      | 9.74E-01       | 1.005       |
| TXN      | thioredoxin                                                            | 1.16E-02     | 1.420       | 2.42E-01     | 1.211       | 9.26E-02       | 1.313       | 5.66E-01       | 1.169       |
| UBE2V1   | ubiquitin-conjugating enzyme E2 variant 1                              | 1.10E-03     | 1.739       | 9.67E-01     | -1.021      | 5.64E-01       | 2.638       | 8.11E-01       | 1.516       |
| XRCC1    | X-ray repair complementing defective repair in Chinese hamster cells 1 | 1.26E-02     | -5.060      | 1.00E00      | 0.000       | 8.02E-01       | 1.055       | 8.55E-01       | 1.061       |

**LMP2-no Inhibitors: Cell death of Tumor Cell lines (P = 0.0433)**

| Symbol  | Entrez Gene Name                           | LMP1 no Inhs |             | LMP2 no Inhs |             | LMP1 with Inhs |             | LMP2 with Inhs |             |
|---------|--------------------------------------------|--------------|-------------|--------------|-------------|----------------|-------------|----------------|-------------|
|         |                                            | p-value      | Fold Change | p-value      | Fold Change | p-value        | Fold Change | p-value        | Fold Change |
| CCAR2   | cell cycle and apoptosis regulator 2       | 6.19E-01     | -1.054      | 3.15E-02     | -1.378      | 7.81E-01       | 1.024       | 8.25E-02       | 1.190       |
| CHTOP   | chromatin target of PRMT1                  | 1.98E-02     | -1.944      | 1.10E-02     | -1.675      | 1.13E-01       | 1.392       | 4.44E-02       | 1.757       |
| DST     | dystonin                                   | 8.11E-02     | 5.021       | 3.65E-02     | 4.176       | 9.43E-01       | 1.041       | 1.43E-01       | 2.468       |
| HNRNPA1 | heterogeneous nuclear ribonucleoprotein A1 | 1.89E-01     | -1.175      | 4.40E-02     | 1.292       | 1.79E-01       | -1.311      | 4.20E-01       | -1.220      |
| NDRG1   | N-myc downstream regulated 1               | 1.89E-04     | 2.066       | 3.24E-02     | 2.279       | 2.95E-01       | -1.325      | 1.22E-01       | 1.474       |
| PML     | promyelocytic leukemia                     | 4.01E-01     | -1.174      | 2.33E-02     | -2.367      | 7.11E-01       | 1.114       | 4.66E-02       | -1.449      |
| PRDX2   | peroxiredoxin 2                            | 1.52E-01     | 1.178       | 3.39E-02     | 1.213       | 6.38E-01       | 1.268       | 6.44E-01       | 1.294       |
| S100A4  | S100 calcium binding protein A4            | 9.45E-01     | 1.096       | 3.90E-03     | 7.360       | 3.00E-02       | -1.797      | 1.74E-01       | 1.771       |
| TPP2    | tripeptidyl peptidase II                   | 2.42E-01     | -2.510      | 4.73E-02     | -1.323      | 1.41E-01       | -1.243      | 8.26E-01       | 1.019       |

**LMP1-with Inhibitors: Cell death of Tumor Cell lines (P = 2.78 x 10<sup>-6</sup>)**

| Symbol | Entrez Gene Name                                 | LMP1 no Inhs |             | LMP2 no Inhs |             | LMP1 with Inhs |             | LMP2 with Inhs |             |
|--------|--------------------------------------------------|--------------|-------------|--------------|-------------|----------------|-------------|----------------|-------------|
|        |                                                  | p-value      | Fold Change | p-value      | Fold Change | p-value        | Fold Change | p-value        | Fold Change |
| AATF   | apoptosis antagonizing transcription factor      | 3.12E-01     | -1.370      | 4.76E-01     | 1.207       | 3.10E-02       | -1.210      | 4.32E-01       | -1.074      |
| ANXA2  | annexin A2                                       | 6.69E-01     | 1.181       | 1.65E-01     | 1.204       | 1.96E-02       | 1.394       | 2.54E-01       | 1.175       |
| APMAP  | adipocyte plasma membrane associated protein     | 8.45E-01     | 1.068       | 7.91E-01     | 1.145       | 4.52E-02       | -1.669      | 9.95E-01       | 1.001       |
| ATP1A1 | ATPase, Na+/K+ transporting, alpha 1 polypeptide | 9.89E-02     | -1.790      | 2.75E-01     | -1.747      | 1.62E-02       | -1.453      | 5.24E-01       | -1.082      |
| BAG1   | BCL2-associated athanogene                       | 1.00E00      | 0.000       | 1.00E00      | 0.000       | 2.96E-03       | 2.613       | 9.49E-01       | 1.028       |
| BAG3   | BCL2-associated athanogene 3                     | 3.91E-01     | 1.292       | 1.46E-01     | 1.807       | 1.74E-03       | 1.712       | 2.66E-01       | -1.176      |
| BCLAF1 | BCL2-associated transcription factor 1           | 2.45E-01     | 1.432       | 8.27E-01     | -1.070      | 1.38E-02       | -1.654      | 8.10E-01       | 1.037       |
| BIRC3  | baculoviral IAP repeat containing 3              | 1.00E00      | 0.000       | 1.00E00      | 0.000       | 1.58E-02       | -1.760      | 6.50E-01       | -1.027      |

|           |                                                                             |          |        |          |        |          |        |          |        |
|-----------|-----------------------------------------------------------------------------|----------|--------|----------|--------|----------|--------|----------|--------|
| CAMK2G    | calcium/calmodulin-dependent protein kinase II gamma                        | 1.00E00  | -1.864 | 1.00E00  | 1.149  | 1.04E-02 | 2.462  | 8.26E-01 | 1.060  |
| CASP1     | caspase 1, apoptosis-related cysteine peptidase                             | 1.00E00  | 1.079  | 1.57E-01 | -1.776 | 3.91E-02 | 1.376  | 4.70E-01 | -1.299 |
| CAST      | calpastatin                                                                 | 5.69E-01 | 1.357  | 1.59E-01 | 2.535  | 6.79E-03 | 1.556  | 2.02E-01 | 1.279  |
| CCT8      | chaperonin containing TCP1, subunit 8 (theta)                               | 4.11E-01 | -1.253 | 9.92E-01 | 1.002  | 9.35E-03 | -1.291 | 4.24E-01 | 1.079  |
| CD44      | CD44 molecule (Indian blood group)                                          | 4.40E-01 | -2.277 | 1.34E-01 | -3.127 | 5.16E-03 | -1.316 | 4.93E-01 | -1.089 |
| CD99      | CD99 molecule                                                               | 1.00E00  | 0.000  | 1.00E00  | 0.000  | 1.94E-02 | 2.356  | 2.42E-01 | 1.329  |
| CDK5      | cyclin-dependent kinase 5                                                   | 1.00E00  | 0.000  | 1.00E00  | 0.000  | 1.64E-02 | -1.426 | 2.70E-01 | 1.029  |
| CIB1      | calcium and integrin binding 1 (calmyrin)                                   |          |        |          |        | 1.50E-02 | 3.427  | 1.00E00  | 1.468  |
| CNN2      | calponin 2                                                                  | 3.14E-02 | 1.550  | 3.23E-01 | 1.388  | 8.13E-04 | 1.753  | 6.26E-02 | 1.246  |
| CNPY2     | canopy FGF signaling regulator 2                                            | 3.30E-01 | -1.142 | 1.91E-01 | -1.227 | 4.87E-02 | 1.708  | 8.21E-02 | 1.679  |
| CRABP2    | cellular retinoic acid binding protein 2                                    | 1.00E00  | 0.000  | 1.00E00  | 0.000  | 2.01E-02 | 10.196 | 5.80E-01 | 1.753  |
| CTBP1     | C-terminal binding protein 1                                                | 5.49E-01 | -1.175 | 5.46E-01 | 1.181  | 3.58E-02 | -1.525 | 2.73E-01 | -1.224 |
| CTSB      | cathepsin B                                                                 | 9.68E-02 | 1.528  | 9.13E-01 | 1.055  | 1.55E-02 | 1.920  | 1.58E-01 | 1.368  |
| CUL1      | cullin 1                                                                    | 1.00E00  | -3.027 | 1.00E00  | 2.030  | 3.57E-03 | -1.414 | 9.59E-01 | -1.002 |
| CYFIP2    | cytoplasmic FMR1 interacting protein 2                                      |          |        |          |        | 4.71E-02 | -1.275 | 1.42E-01 | -3.469 |
| DDX58     | DEAD (Asp-Glu-Ala-Asp) box polypeptide 58                                   |          |        |          |        | 2.50E-02 | 4.906  | 9.74E-01 | -1.016 |
| EIF2A     | eukaryotic translation initiation factor 2A, 65kDa                          | 9.33E-01 | -1.021 | 3.74E-01 | 1.287  | 2.67E-02 | -1.316 | 5.59E-02 | -1.223 |
| EIF2S1    | eukaryotic translation initiation factor 2, subunit 1 alpha, 35kDa          | 1.87E-01 | 1.365  | 7.04E-01 | 1.067  | 2.93E-03 | -1.354 | 7.24E-01 | -1.028 |
| ENO1      | enolase 1, (alpha)                                                          | 3.39E-01 | 1.109  | 1.62E-01 | 1.484  | 6.46E-03 | -2.532 | 8.54E-03 | -2.414 |
| ETHE1     | ethylmalonic encephalopathy 1                                               | 3.43E-02 | 2.076  | 6.88E-01 | 1.082  | 2.01E-02 | 1.558  | 6.43E-01 | -1.084 |
| EZR       | ezrin                                                                       | 4.70E-01 | 1.533  | 6.72E-01 | 1.354  | 3.55E-02 | 2.326  | 9.76E-01 | -1.012 |
| FAP       | fibroblast activation protein, alpha                                        |          |        |          |        | 2.21E-02 | 13.090 | 1.00E00  |        |
| FKBP5     | FK506 binding protein 5                                                     | 5.84E-01 | -1.202 | 5.13E-01 | 1.276  | 3.74E-03 | -1.378 | 2.37E-01 | 1.083  |
| FLNB      | filamin B, beta                                                             | 1.24E-01 | 1.607  | 6.49E-01 | 1.104  | 3.33E-02 | 1.281  | 1.84E-01 | -3.752 |
| FXN       | frataxin                                                                    | 1.00E00  | 0.000  | 1.00E00  | 0.000  | 3.71E-04 | -1.877 | 1.48E-01 | -1.835 |
| G6PD      | glucose-6-phosphate dehydrogenase                                           | 4.85E-01 | -1.477 | 8.33E-01 | -1.124 | 4.02E-02 | -1.406 | 8.21E-01 | -1.038 |
| GBE1      | glucan (1,4-alpha-), branching enzyme 1                                     | 9.21E-01 | 1.035  | 2.90E-01 | 1.178  | 9.30E-03 | -1.472 | 1.42E-02 | -1.254 |
| GLRX      | glutaredoxin (thioltransferase)                                             | 1.00E00  | 1.035  | 1.00E00  | -1.986 | 3.26E-02 | 2.976  | 2.46E-01 | -1.715 |
| GPX1      | glutathione peroxidase 1                                                    | 5.95E-01 | 1.428  | 6.56E-01 | 1.449  | 1.46E-02 | 1.273  | 1.51E-01 | 1.193  |
| GRN       | granulin                                                                    |          |        |          |        | 7.46E-04 | 1.284  | 2.37E-01 | 1.124  |
| GSN       | gelsolin                                                                    | 4.22E-01 | 1.945  | 1.00E00  | -1.706 | 2.18E-03 | 1.703  | 1.23E-01 | -1.197 |
| HDAC2     | histone deacetylase 2                                                       | 1.00E00  | -3.841 | 1.00E00  | -1.241 | 4.63E-02 | -1.220 | 4.45E-01 | -1.123 |
| HNRNPK    | heterogeneous nuclear ribonucleoprotein K                                   | 6.23E-01 | 1.079  | 6.77E-01 | 1.057  | 1.97E-02 | -1.205 | 3.08E-01 | -2.032 |
| HSPA8     | heat shock 70kDa protein 8                                                  | 7.91E-01 | 1.055  | 3.99E-01 | 1.176  | 4.62E-02 | -2.934 | 5.98E-01 | 2.678  |
| HSPA1A/HS | heat shock 70kDa protein 1A                                                 | 1.43E-01 | 1.284  | 3.50E-01 | 1.333  | 2.34E-03 | -1.242 | 1.93E-01 | -1.064 |
| IFI16     | interferon, gamma-inducible protein 16                                      | 9.19E-01 | -1.030 | 3.01E-01 | -1.441 | 4.97E-02 | 1.281  | 9.11E-01 | 1.012  |
| IKBKG     | inhibitor of kappa light polypeptide gene enhancer in B-cells, kinase gamma | 1.00E00  | 1.673  | 1.00E00  | 1.769  | 5.03E-03 | 1.742  | 2.19E-01 | 1.327  |
| IL18      | interleukin 18                                                              | 3.74E-01 | -1.508 | 6.32E-01 | -1.222 | 5.63E-03 | 1.981  | 1.43E-03 | 1.372  |
| IL1RN     | interleukin 1 receptor antagonist                                           | 1.00E00  | 0.000  | 1.00E00  | 0.000  | 4.59E-02 | 5.796  | 2.60E-01 | 3.522  |
| ILKAP     | integrin-linked kinase-associated serine/threonine phosphatase              | 1.00E00  | -1.000 | 1.00E00  | -1.490 | 4.27E-02 | -1.589 | 2.27E-01 | -1.253 |
| ITGA5     | integrin, alpha 5 (fibronectin receptor, alpha polypeptide)                 | 3.64E-01 | -2.172 | 1.00E00  | -3.726 | 4.33E-02 | -2.098 | 2.27E-02 | -2.119 |
| ITGB4     | integrin, beta 4                                                            | 5.06E-01 | -1.180 | 7.55E-01 | -1.092 | 3.98E-02 | -1.164 | 1.00E00  | -1.292 |
| KEAP1     | kelch-like ECH-associated protein 1                                         | 1.00E-01 | 1.388  | 1.00E00  | 0.000  | 4.76E-02 | 1.310  | 1.49E-01 | -1.211 |
| KIF1C     | kinesin family member 1C                                                    | 1.00E00  | 1.102  | 1.00E00  | 0.000  | 1.49E-02 | 1.998  | 5.97E-01 | 1.141  |
| LAMA5     | laminin, alpha 5                                                            | 2.69E-01 | -2.706 | 1.00E00  | -3.277 | 1.45E-02 | -1.401 | 4.71E-02 | -2.294 |
| LETM1     | leucine zipper-EF-hand containing transmembrane protein 1                   | 4.86E-01 | 1.262  | 8.10E-01 | 1.134  | 3.56E-02 | 1.305  | 3.12E-01 | 1.164  |
| LGALS3    | lectin, galactoside-binding, soluble, 3                                     | 2.19E-01 | 1.602  | 5.08E-01 | -1.695 | 1.83E-02 | 2.188  | 6.11E-01 | 1.139  |
| MED21     | mediator complex subunit 21                                                 | 1.00E00  | 0.000  | 1.00E00  | 0.000  | 1.37E-02 | 1.604  | 3.51E-01 | 1.245  |
| MET       | MET proto-oncogene, receptor tyrosine kinase                                | 1.00E00  | 0.000  | 1.00E00  | 0.000  | 4.99E-02 | -1.277 | 6.91E-01 | 1.046  |
| MVP       | major vault protein                                                         | 1.50E-02 | 1.448  | 5.34E-01 | -1.110 | 3.14E-04 | 1.512  | 1.29E-01 | -1.259 |
| MYO6      | myosin VI                                                                   | 7.07E-01 | 1.104  | 2.96E-01 | -1.384 | 2.53E-02 | 1.468  | 7.71E-02 | -1.689 |
| PACS2     | phosphofurin acidic cluster sorting protein 2                               | 1.00E00  | 0.000  | 1.00E00  | 0.000  | 4.29E-02 | 1.448  | 1.00E00  |        |

|           |                                                                            |          |        |          |        |          |        |          |        |
|-----------|----------------------------------------------------------------------------|----------|--------|----------|--------|----------|--------|----------|--------|
| PAK1      | p21 protein (Cdc42/Rac)-activated kinase 1                                 |          |        |          |        | 3.34E-02 | -1.594 | 1.00E00  |        |
| PARP1     | poly (ADP-ribose) polymerase 1                                             | 2.31E-01 | -1.364 | 4.50E-01 | -1.262 | 2.46E-03 | -1.234 | 3.58E-01 | 1.134  |
| PAWR      | PRKC, apoptosis, WT1, regulator                                            | 1.00E00  | 1.098  | 1.00E00  | 0.000  | 7.64E-04 | 2.685  | 1.95E-01 | 1.444  |
| PCBP2     | poly(rC) binding protein 2                                                 | 8.84E-01 | 1.065  | 5.91E-01 | -1.373 | 3.77E-02 | 1.196  | 1.54E-01 | -2.347 |
| PDE4D     | phosphodiesterase 4D, cAMP-specific                                        | 1.00E00  | 0.000  | 1.00E00  | 0.000  | 7.98E-03 | -3.140 | 1.15E-01 | -1.516 |
| PGRMC1    | progesterone receptor membrane component 1                                 | 8.46E-01 | 1.168  | 3.56E-01 | -2.648 | 1.94E-02 | -1.380 | 4.82E-02 | -1.261 |
| PKM       | pyruvate kinase, muscle                                                    | 5.43E-01 | -1.856 | 1.00E00  | -1.791 | 4.20E-02 | -1.686 | 2.55E-01 | -1.288 |
| PLA2G4A   | phospholipase A2, group IVA (cytosolic, calcium-dependent)                 | 1.00E00  | 0.000  | 1.00E00  | 0.000  | 4.44E-02 | -1.379 | 3.22E-01 | 1.211  |
| PPAT      | phosphoribosyl pyrophosphate amidotransferase                              | 5.21E-01 | -1.316 | 4.20E-01 | -1.097 | 4.83E-02 | 1.675  | 2.37E-01 | 1.608  |
| PPID      | peptidylprolyl isomerase D                                                 | 1.43E-01 | -1.434 | 1.18E-01 | -1.530 | 3.17E-02 | -1.441 | 6.87E-01 | -1.041 |
| PPP1R10   | protein phosphatase 1, regulatory subunit 10                               | 1.00E00  | -1.016 | 1.00E00  | 1.139  | 2.36E-02 | -1.314 | 6.81E-02 | -1.247 |
| PSMD14    | proteasome (prosome, macropain) 26S subunit, non-ATPase, 14                | 8.70E-01 | -1.028 | 9.65E-01 | 1.043  | 4.95E-02 | -1.390 | 4.85E-01 | -1.234 |
| RAP1GDS1  | RAP1, GTP-GDP dissociation stimulator 1                                    | 7.18E-01 | -1.186 | 8.78E-01 | -1.036 | 1.16E-03 | -2.307 | 2.87E-02 | -2.073 |
| RBX1      | ring-box 1, E3 ubiquitin protein ligase                                    | 1.00E00  | 0.000  | 1.00E00  | 0.000  | 2.30E-02 | -1.494 | 7.36E-01 | -1.081 |
| S100A4    | S100 calcium binding protein A4                                            | 9.45E-01 | 1.096  | 3.90E-03 | 7.360  | 3.00E-02 | -1.797 | 1.74E-01 | 1.771  |
| S100A11   | S100 calcium binding protein A11                                           | 7.07E-01 | -1.259 | 7.38E-01 | -1.312 | 1.84E-03 | 1.639  | 6.48E-02 | 1.255  |
| SLPI      | secretory leukocyte peptidase inhibitor                                    |          |        |          |        | 1.03E-02 | 9.998  | 3.86E-01 | 1.397  |
| SND1      | staphylococcal nuclease and tudor domain containing 1                      | 4.51E-01 | -1.173 | 7.43E-01 | 1.075  | 2.77E-02 | -1.319 | 3.66E-01 | -1.094 |
| SOD1      | superoxide dismutase 1, soluble                                            | 4.63E-01 | 2.670  | 7.65E-01 | 1.356  | 1.68E-02 | 2.011  | 6.23E-01 | -1.434 |
| SVIL      | supervillin                                                                | 9.52E-01 | 1.056  | 1.00E00  | -1.227 | 2.40E-04 | 2.199  | 3.06E-01 | 1.326  |
| SYNGR2    | synaptogyrin 2                                                             |          |        |          |        | 2.59E-03 | 1.885  | 4.98E-01 | 1.113  |
| TBK1      | TANK-binding kinase 1                                                      | 1.00E00  | 1.058  | 1.00E00  | 0.000  | 4.25E-02 | -1.305 | 3.19E-01 | -1.093 |
| TCEB1     | transcription elongation factor B (SIII), polypeptide 1 (15kDa, elongin C) | 6.52E-01 | 1.202  | 7.71E-01 | 1.235  | 4.49E-02 | -1.414 | 8.04E-01 | -1.028 |
| TCP1      | t-complex 1                                                                | 2.91E-01 | -1.347 | 8.89E-01 | 1.042  | 2.03E-02 | -1.191 | 5.97E-01 | 1.028  |
| TIMP1     | TIMP metalloproteinase inhibitor 1                                         | 8.12E-01 | 1.079  | 1.00E00  | -1.174 | 1.98E-02 | 1.741  | 9.21E-01 | 1.008  |
| TIMP3     | TIMP metalloproteinase inhibitor 3                                         | 1.00E00  | -2.697 | 1.00E00  | 0.000  | 4.13E-03 | -1.852 | 4.38E-01 | -1.628 |
| TLR3      | toll-like receptor 3                                                       |          |        |          |        | 4.57E-02 | -1.300 | 4.35E-02 | -2.468 |
| TMSB10/TM | thymosin beta 10                                                           | 2.63E-01 | 3.370  | 2.81E-01 | 1.836  | 3.77E-02 | 5.288  | 7.55E-01 | -1.269 |
| TPD52     | tumor protein D52                                                          | 3.64E-01 | -1.420 | 1.00E00  | 0.000  | 4.08E-02 | 2.962  | 3.36E-01 | 1.648  |
| TXNRD1    | thioredoxin reductase 1                                                    | 5.04E-01 | 1.560  | 9.93E-01 | 1.012  | 2.08E-02 | -2.032 | 9.20E-02 | -1.882 |
| UBE2K     | ubiquitin-conjugating enzyme E2K                                           | 5.17E-01 | -1.320 | 6.95E-01 | 1.205  | 1.86E-03 | -1.490 | 4.19E-01 | -1.069 |
| UBE2L3    | ubiquitin-conjugating enzyme E2L 3                                         | 9.58E-01 | -1.053 | 9.55E-01 | -1.079 | 1.42E-02 | 4.031  | 2.62E-01 | 1.810  |
| XAB2      | XPA binding protein 2                                                      | 1.00E00  | 1.029  | 1.00E00  | 1.851  | 2.07E-02 | -1.513 | 2.66E-01 | -1.533 |

**LMP2-with Inhibitors: Cell Death of Tumor Cell lines (P = 0.0151)**

| Symbol  | Entrez Gene Name                                 | LMP1 no Inhs |             | LMP2 no Inhs |             | LMP1 with Inhs |             | LMP2 with Inhs |             |
|---------|--------------------------------------------------|--------------|-------------|--------------|-------------|----------------|-------------|----------------|-------------|
|         |                                                  | p-value      | Fold Change | p-value      | Fold Change | p-value        | Fold Change | p-value        | Fold Change |
| API5    | apoptosis inhibitor 5                            | 6.53E-01     | 1.114       | 7.95E-01     | 1.234       | 8.46E-02       | -1.360      | 1.87E-02       | -1.382      |
| ATF1    | activating transcription factor 1                |              |             |              |             | 5.54E-01       | 1.108       | 3.67E-02       | 1.330       |
| BCL2L11 | BCL2-like 11 (apoptosis facilitator)             |              |             |              |             | 2.64E-01       | -2.048      | 3.15E-02       | -1.593      |
| CBR1    | carbonyl reductase 1                             | 9.75E-01     | -1.004      | 1.50E-01     | 1.242       | 5.81E-01       | 1.061       | 1.39E-02       | 1.397       |
| CDC34   | cell division cycle 34                           |              |             |              |             | 8.61E-01       | -1.070      | 3.99E-02       | -2.274      |
| CDKN1C  | cyclin-dependent kinase inhibitor 1C (p57, Kip2) | 1.00E00      | 0.000       | 1.00E00      | 0.000       | 2.48E-01       | 1.536       | 4.13E-03       | -1.767      |
| CEBPD   | CCAAT/enhancer binding protein (C/EBP), delta    | 9.02E-02     | -1.547      | 2.94E-01     | -1.458      | 6.40E-01       | 1.213       | 3.42E-02       | 1.828       |
| CENPB   | centromere protein B, 80kDa                      | 1.00E00      | 0.000       | 1.00E00      | 0.000       | 7.29E-01       | 1.061       | 8.70E-03       | -1.487      |
| CHTOP   | chromatin target of PRMT1                        | 1.98E-02     | -1.944      | 1.10E-02     | -1.675      | 1.13E-01       | 1.392       | 4.44E-02       | 1.757       |
| CLCA2   | chloride channel accessory 2                     | 3.87E-01     | -1.357      | 1.00E00      | -2.046      | 7.82E-01       | -1.084      | 1.99E-02       | 2.104       |
| CYR61   | cysteine-rich, angiogenic inducer, 61            | 1.00E00      | 0.000       | 1.00E00      | 0.000       | 4.67E-01       | -1.418      | 9.40E-03       | -2.249      |
| DAPK3   | death-associated protein kinase 3                | 1.00E00      | 0.000       | 1.00E00      | 0.000       | 2.18E-01       | 1.285       | 4.16E-02       | -1.518      |
| DHCR24  | 24-dehydrocholesterol reductase                  | 1.00E00      | 0.000       | 1.00E00      | 0.000       | 2.07E-01       | 1.410       | 7.50E-03       | -1.884      |
| DUT     | deoxyuridine triphosphatase                      | 2.13E-01     | -1.391      | 5.59E-01     | -1.146      | 8.93E-02       | -1.673      | 3.18E-03       | -1.737      |
| EI24    | etoposide induced 2.4                            | 1.00E00      | -3.013      | 1.00E00      | 0.000       | 9.20E-01       | 1.041       | 4.92E-02       | -2.038      |
| ENO1    | enolase 1, (alpha)                               | 3.39E-01     | 1.109       | 1.62E-01     | 1.484       | 6.46E-03       | -2.532      | 8.54E-03       | -2.414      |

|          |                                                                        |          |        |          |        |          |        |          |         |
|----------|------------------------------------------------------------------------|----------|--------|----------|--------|----------|--------|----------|---------|
| FAS      | Fas cell surface death receptor                                        | 1.00E00  | -1.102 | 1.00E00  | 0.000  | 1.24E-01 | -1.230 | 3.08E-03 | -1.720  |
| GBE1     | glucan (1,4-alpha-), branching enzyme 1                                | 9.21E-01 | 1.035  | 2.90E-01 | 1.178  | 9.30E-03 | -1.472 | 1.42E-02 | -1.254  |
| H2AFX    | H2A histone family, member X                                           | 8.16E-01 | -1.078 | 9.95E-01 | 1.009  | 8.35E-01 | 1.046  | 4.72E-02 | 1.489   |
| HMMR     | hyaluronan-mediated motility receptor (RHAMM)                          | 1.00E00  | 0.000  | 1.00E00  | 0.000  | 1.00E00  | -3.729 | 2.60E-02 | -3.481  |
| IL18     | interleukin 18                                                         | 3.74E-01 | -1.508 | 6.32E-01 | -1.222 | 5.63E-03 | 1.981  | 1.43E-03 | 1.372   |
| ITGA5    | integrin, alpha 5 (fibronectin receptor, alpha polypeptide)            | 3.64E-01 | -2.172 | 1.00E00  | -3.726 | 4.33E-02 | -2.098 | 2.27E-02 | -2.119  |
| KANK2    | KN motif and ankyrin repeat domains 2                                  | 1.00E00  | 0.000  | 1.00E00  | 0.000  | 8.80E-02 | -1.928 | 6.18E-03 | -2.708  |
| LAMA5    | laminin, alpha 5                                                       | 2.69E-01 | -2.706 | 1.00E00  | -3.277 | 1.45E-02 | -1.401 | 4.71E-02 | -2.294  |
| MAN2C1   | mannosidase, alpha, class 2C, member 1                                 | 1.00E00  | 0.000  | 1.00E00  | 0.000  | 2.67E-01 | -1.161 | 3.69E-02 | -2.514  |
| MBD1     | methyl-CpG binding domain protein 1                                    | 1.00E00  | 0.000  | 1.00E00  | 0.000  | 3.34E-01 | -1.117 | 2.46E-03 | -1.734  |
| MCM7     | minichromosome maintenance complex component 7                         | 2.36E-01 | -1.658 | 1.82E-01 | -1.311 | 1.73E-01 | -1.253 | 4.74E-02 | -1.355  |
| MSI2     | musashi RNA-binding protein 2                                          | 1.00E00  | 1.317  | 1.00E00  | 1.552  | 1.00E00  | -1.322 | 1.95E-02 | -1.841  |
| MT1X     | metallothionein 1X                                                     |          |        |          |        | 6.06E-01 | 1.160  | 9.25E-03 | 2.307   |
| NFKB1    | nuclear factor of kappa light polypeptide gene enhancer in B-cells 1   | 7.54E-01 | -1.280 | 8.35E-01 | 1.177  | 9.42E-02 | 1.205  | 1.63E-02 | 1.226   |
| NPM1     | nucleophosmin (nucleolar phosphoprotein B23, numatrin)                 | 3.04E-01 | -1.476 | 1.10E-01 | -1.239 | 2.68E-01 | -1.670 | 1.58E-02 | 1.215   |
| OGT      | O-linked N-acetylglucosamine (GlcNAc) transferase                      | 4.88E-01 | 1.135  | 9.90E-01 | 1.007  | 9.40E-01 | 1.015  | 2.70E-02 | -1.424  |
| PDCD6IP  | programmed cell death 6 interacting protein                            | 1.16E-01 | 1.678  | 5.08E-01 | 1.196  | 1.39E-01 | -1.067 | 2.27E-02 | -1.149  |
| PDLIM7   | PDZ and LIM domain 7 (enigma)                                          | 2.42E-01 | 1.589  | 4.20E-01 | -1.346 | 7.52E-01 | -1.132 | 5.62E-03 | -1.875  |
| PGRMC1   | progesterone receptor membrane component 1                             | 8.46E-01 | 1.168  | 3.56E-01 | -2.648 | 1.94E-02 | -1.380 | 4.82E-02 | -1.261  |
| PIAS3    | protein inhibitor of activated STAT, 3                                 |          |        |          |        | 9.02E-02 | 4.761  | 1.35E-02 | 6.194   |
| PML      | promyelocytic leukemia                                                 | 4.01E-01 | -1.174 | 2.33E-02 | -2.367 | 7.11E-01 | 1.114  | 4.66E-02 | -1.449  |
| PPP1R13L | protein phosphatase 1, regulatory subunit 13 like                      | 4.18E-01 | 1.766  | 3.18E-01 | -1.383 | 3.89E-01 | 1.170  | 4.07E-02 | -1.352  |
| PPP2R2A  | protein phosphatase 2, regulatory subunit B, alpha                     | 4.81E-01 | 1.459  | 8.73E-01 | 1.147  | 2.85E-01 | -1.232 | 7.48E-03 | -1.358  |
| PSIP1    | PC4 and SFRS1 interacting protein 1                                    | 4.98E-01 | -1.186 | 1.00E00  | 1.241  | 1.30E-01 | -1.136 | 4.78E-03 | -1.159  |
| PSMD2    | proteasome (prosome, macropain) 26S subunit, non-ATPase, 2             | 5.38E-03 | 1.171  | 1.21E-01 | 1.472  | 2.87E-01 | -1.067 | 2.70E-02 | -1.227  |
| RAD9A    | RAD9 homolog A (S. pombe)                                              | 1.00E00  | 0.000  | 1.00E00  | 0.000  | 3.19E-01 | -1.244 | 3.39E-02 | -1.702  |
| RAP1GDS1 | RAP1, GTP-GDP dissociation stimulator 1                                | 7.18E-01 | -1.186 | 8.78E-01 | -1.036 | 1.16E-03 | -2.307 | 2.87E-02 | -2.073  |
| RIPK1    | receptor (TNFRSF)-interacting serine-threonine kinase 1                | 1.00E00  | 0.000  | 1.00E00  | 0.000  | 3.61E-01 | 1.444  | 3.39E-03 | -1.610  |
| RPS6KB1  | ribosomal protein S6 kinase, 70kDa, polypeptide 1                      | 1.00E00  | 1.861  | 1.00E00  | 1.983  | 1.04E-01 | -1.675 | 3.62E-02 | -1.878  |
| RTN4     | reticulon 4                                                            | 7.07E-01 | -1.774 | 1.00E00  | -1.053 | 6.29E-02 | 1.171  | 8.41E-03 | -1.397  |
| SLC3A2   | solute carrier family 3 (amino acid transporter heavy chain), member 2 | 1.88E-01 | -1.396 | 9.50E-01 | -1.051 | 3.39E-01 | -1.430 | 3.13E-02 | 1.445   |
| SMAD2    | SMAD family member 2                                                   | 9.07E-01 | -1.022 | 1.00E00  | -1.036 | 3.94E-01 | 1.118  | 3.74E-02 | -1.304  |
| STIM1    | stromal interaction molecule 1                                         | 1.00E00  | 0.000  | 1.00E00  | 0.000  | 4.59E-01 | 1.167  | 3.48E-02 | -1.984  |
| TGM2     | transglutaminase 2                                                     | 1.00E00  | 1.933  | 1.00E00  | 0.000  | 5.35E-01 | 1.128  | 1.79E-03 | -3.500  |
| TLR3     | toll-like receptor 3                                                   |          |        |          |        | 4.57E-02 | -1.300 | 4.35E-02 | -2.468  |
| TPX2     | TPX2, microtubule-associated                                           |          |        |          |        | 7.32E-02 | -7.719 | 3.53E-02 | -19.498 |
| TRAF6    | TNF receptor-associated factor 6, E3 ubiquitin protein ligase          | 1.00E00  | 0.000  | 1.00E00  | 0.000  | 1.29E-01 | -1.539 | 5.71E-03 | -1.943  |
| TRAP1    | TNF receptor-associated protein 1                                      | 3.42E-01 | -1.458 | 8.55E-01 | -1.022 | 2.57E-01 | -1.143 | 2.79E-02 | 1.389   |
| UBE2C    | ubiquitin-conjugating enzyme E2C                                       | 1.00E00  | 0.000  | 1.00E00  | 0.000  | 1.91E-01 | -1.937 | 1.21E-02 | -5.242  |

|        |                                                       | LMP1 no Inhs |             | LMP2 no Inhs |             | LMP1 with Inhs |             | LMP2 with Inhs |             |
|--------|-------------------------------------------------------|--------------|-------------|--------------|-------------|----------------|-------------|----------------|-------------|
| Symbol | Entrez Gene Name                                      | p-value      | Fold Change | p-value      | Fold Change | p-value        | Fold Change | p-value        | Fold Change |
| EIF3L  | eukaryotic translation initiation factor 3, subunit L | 7.50E-04     | -1.578      | 3.03E-01     | -1.421      | 1.52E-01       | -1.223      | 1.01E-01       | -1.191      |
| EIF4A1 | eukaryotic translation initiation factor 4A1          | 2.22E-02     | -1.494      | 6.00E-01     | -1.108      | 5.36E-03       | -1.474      | 2.21E-03       | -1.518      |

|        |                       | LMP1 no Inhs |             | LMP2 no Inhs |             | LMP1 with Inhs |             | LMP2 with Inhs |             |
|--------|-----------------------|--------------|-------------|--------------|-------------|----------------|-------------|----------------|-------------|
| Symbol | Entrez Gene Name      | p-value      | Fold Change | p-value      | Fold Change | p-value        | Fold Change | p-value        | Fold Change |
| RPS25  | ribosomal protein S25 | 1.52E-01     | 1.14        | 3.99E-02     | 1.423       | 8.54E-01       | -1.043      | 4.58E-01       | -1.207      |

|         |                                                       | LMP1 no Inhs |             | LMP2 no Inhs |             | LMP1 with Inhs |             | LMP2 with Inhs |             |
|---------|-------------------------------------------------------|--------------|-------------|--------------|-------------|----------------|-------------|----------------|-------------|
| Symbol  | Entrez Gene Name                                      | p-value      | Fold Change | p-value      | Fold Change | p-value        | Fold Change | p-value        | Fold Change |
| EIF3B   | eukaryotic translation initiation factor 3, subunit B | 3.42E-01     | -1.386      | 8.48E-01     | 1.074       | 1.02E-02       | -1.676      | 2.12E-03       | -1.435      |
| EIF3C   | eukaryotic translation initiation factor 3, subunit C | 5.73E-01     | -1.271      | 7.02E-01     | -1.177      | 9.18E-03       | -1.354      | 1.15E-01       | -1.17       |
| EIF3E   | eukaryotic translation initiation factor 3, subunit E | 2.79E-01     | 1.27        | 5.54E-01     | -1.191      | 4.88E-02       | -1.981      | 2.96E-02       | -1.483      |
| EIF4A1  | eukaryotic translation initiation factor 4A1          | 2.22E-02     | -1.494      | 6.00E-01     | -1.108      | 5.36E-03       | -1.474      | 2.21E-03       | -1.518      |
| EIF4G3  | eukaryotic translation initiation factor 4 gamma, 3   | 1.00E+00     | -1.319      | 1.00E+00     | 1.355       | 2.49E-02       | 1.703       | 1.09E-01       | -1.517      |
| RHOT1   | ras homolog family member T1                          | 1.00E+00     | 1.452       | 1.00E+00     | -1.341      | 4.97E-02       | 2.05        | 6.21E-01       | 1.195       |
| RPS6KA4 | ribosomal protein S6 kinase, 90kDa, polypeptide 4     | 1.00E+00     | -1.026      | 1.00E+00     | -1.418      | 2.13E-02       | -1.624      | 1.13E-01       | -1.257      |

|         |                                                       | LMP1 no Inhs |             | LMP2 no Inhs |             | LMP1 with Inhs |             | LMP2 with Inhs |             |
|---------|-------------------------------------------------------|--------------|-------------|--------------|-------------|----------------|-------------|----------------|-------------|
| Symbol  | Entrez Gene Name                                      | p-value      | Fold Change | p-value      | Fold Change | p-value        | Fold Change | p-value        | Fold Change |
| EIF3B   | eukaryotic translation initiation factor 3, subunit B | 3.42E-01     | -1.386      | 8.48E-01     | 1.074       | 1.02E-02       | -1.676      | 2.12E-03       | -1.435      |
| EIF3E   | eukaryotic translation initiation factor 3, subunit E | 2.79E-01     | 1.27        | 5.54E-01     | -1.191      | 4.88E-02       | -1.981      | 2.96E-02       | -1.483      |
| EIF3K   | eukaryotic translation initiation factor 3, subunit K | 4.74E-01     | -1.416      | 6.92E-01     | -1.129      | 3.06E-01       | -1.21       | 4.08E-02       | -1.481      |
| EIF3M   | eukaryotic translation initiation factor 3, subunit M | 8.12E-01     | -1.073      | 1.13E-01     | -1.587      | 2.70E-01       | -1.202      | 4.54E-02       | -1.495      |
| EIF4A1  | eukaryotic translation initiation factor 4A1          | 2.22E-02     | -1.494      | 6.00E-01     | -1.108      | 5.36E-03       | -1.474      | 2.21E-03       | -1.518      |
| EIF4A2  | eukaryotic translation initiation factor 4A2          | 1.00E+00     | 0           | 1.00E+00     | 0           | 5.80E-01       | 1.224       | 4.97E-02       | -2.874      |
| PPP2R2A | protein phosphatase 2, regulatory subunit B, alpha    | 4.81E-01     | 1.459       | 8.73E-01     | 1.147       | 2.85E-01       | -1.232      | 7.48E-03       | -1.358      |
| RHEB    | Ras homolog enriched in brain                         | 1.00E+00     | 0           | 1.00E+00     | 0           | 4.60E-01       | -1.64       | 3.30E-02       | -1.975      |
| RPS27   | ribosomal protein S27                                 | 8.41E-01     | 1.058       | 2.67E-01     | -2.025      | 4.95E-01       | 1.154       | 3.28E-02       | 1.64        |
| RPS15A  | ribosomal protein S15a                                | 6.98E-02     | -1.702      | 3.15E-01     | -1.182      | 9.19E-01       | -1.093      | 2.40E-03       | 1.238       |
| RPS6KB1 | ribosomal protein S6 kinase, 70kDa, polypeptide 1     | 1.00E+00     | 1.861       | 1.00E+00     | 1.983       | 1.04E-01       | -1.675      | 3.62E-02       | -1.878      |

| <b>LMP1-no Inhibitors: PI3K/AKT signaling (P = 0.523)</b> |                         | <b>LMP1 no Inhs</b> |                    | <b>LMP2 no Inhs</b> |                    | <b>LMP1 with Inhs</b> |                    | <b>LMP2 with Inhs</b> |                    |
|-----------------------------------------------------------|-------------------------|---------------------|--------------------|---------------------|--------------------|-----------------------|--------------------|-----------------------|--------------------|
| <b>Symbol</b>                                             | <b>Entrez Gene Name</b> | <b>p-value</b>      | <b>Fold Change</b> | <b>p-value</b>      | <b>Fold Change</b> | <b>p-value</b>        | <b>Fold Change</b> | <b>p-value</b>        | <b>Fold Change</b> |
| SFN                                                       | stratifin               | 3.53E-02            | 2.029              | 2.01E-01            | 1.754              | 2.44E-01              | -1.2               | 6.46E-01              | -1.123             |

none

| <b>LMP1 with Inhibitors: PI3K/AKT signaling (P = 0.264)</b> |                                                                             | <b>LMP1 no Inhs</b> |                    | <b>LMP2 no Inhs</b> |                    | <b>LMP1 with Inhs</b> |                    | <b>LMP2 with Inhs</b> |                    |
|-------------------------------------------------------------|-----------------------------------------------------------------------------|---------------------|--------------------|---------------------|--------------------|-----------------------|--------------------|-----------------------|--------------------|
| <b>Symbol</b>                                               | <b>Entrez Gene Name</b>                                                     | <b>p-value</b>      | <b>Fold Change</b> | <b>p-value</b>      | <b>Fold Change</b> | <b>p-value</b>        | <b>Fold Change</b> | <b>p-value</b>        | <b>Fold Change</b> |
| HSP90AA1                                                    | heat shock protein 90kDa alpha (cytosolic), class A member 1                | 6.54E-01            | -1.196             | 9.28E-01            | -1.024             | 3.43E-02              | -1.335             | 1.36E-01              | -1.143             |
| IKBKG                                                       | inhibitor of kappa light polypeptide gene enhancer in B-cells, kinase gamma | 1.00E+00            | 1.673              | 1.00E+00            | 1.769              | 5.03E-03              | 1.742              | 2.19E-01              | 1.327              |
| ITGA5                                                       | integrin, alpha 5 (fibronectin receptor, alpha polypeptide)                 | 3.64E-01            | -2.172             | 1.00E+00            | -3.726             | 4.33E-02              | -2.098             | 2.27E-02              | -2.119             |
| MAP2K2                                                      | mitogen-activated protein kinase kinase 2                                   | 1.00E+00            | -1.03              | 1.00E+00            | 1.079              | 2.57E-02              | -1.397             | 2.02E-02              | -1.306             |
| THEM4                                                       | thioesterase superfamily member 4                                           | 1.00E+00            | -1.251             | 1.00E+00            | 1.066              | 5.45E-03              | -1.605             | 6.83E-01              | -1.141             |

| <b>LMP2 with Inhibitors: PI3K/AKT signaling (P = 0.003)</b> |                                                                      | <b>LMP1 no Inhs</b> |                    | <b>LMP2 no Inhs</b> |                    | <b>LMP1 with Inhs</b> |                    | <b>LMP2 with Inhs</b> |                    |
|-------------------------------------------------------------|----------------------------------------------------------------------|---------------------|--------------------|---------------------|--------------------|-----------------------|--------------------|-----------------------|--------------------|
| <b>Symbol</b>                                               | <b>Entrez Gene Name</b>                                              | <b>p-value</b>      | <b>Fold Change</b> | <b>p-value</b>      | <b>Fold Change</b> | <b>p-value</b>        | <b>Fold Change</b> | <b>p-value</b>        | <b>Fold Change</b> |
| INPP5K                                                      | inositol polyphosphate-5-phosphatase K                               |                     |                    |                     |                    | 3.88E-01              | 1.251              | 3.46E-02              | -1.27              |
| ITGA5                                                       | integrin, alpha 5 (fibronectin receptor, alpha polypeptide)          | 3.64E-01            | -2.172             | 1.00E+00            | -3.726             | 4.33E-02              | -2.098             | 2.27E-02              | -2.119             |
| MAP2K2                                                      | mitogen-activated protein kinase kinase 2                            | 1.00E+00            | -1.03              | 1.00E+00            | 1.079              | 2.57E-02              | -1.397             | 2.02E-02              | -1.306             |
| NFKB1                                                       | nuclear factor of kappa light polypeptide gene enhancer in B-cells 1 | 7.54E-01            | -1.28              | 8.35E-01            | 1.177              | 9.42E-02              | 1.205              | 1.63E-02              | 1.226              |
| PPP2R2A                                                     | protein phosphatase 2, regulatory subunit B, alpha                   | 4.81E-01            | 1.459              | 8.73E-01            | 1.147              | 2.85E-01              | -1.232             | 7.48E-03              | -1.358             |
| RHEB                                                        | Ras homolog enriched in brain                                        | 1.00E+00            | 0                  | 1.00E+00            | 0                  | 4.60E-01              | -1.64              | 3.30E-02              | -1.975             |
| RPS6KB1                                                     | ribosomal protein S6 kinase, 70kDa, polypeptide 1                    | 1.00E+00            | 1.861              | 1.00E+00            | 1.983              | 1.04E-01              | -1.675             | 3.62E-02              | -1.878             |
| SYNJ2                                                       | synaptojanin 2                                                       | 1.00E+00            | 0                  | 1.00E+00            | 0                  | 2.15E-01              | 1.608              | 4.39E-02              | 1.937              |

**LMP1-no Inhibitors: PTEN signaling (P = 1)**

none LMP1 no Inhs LMP2 no Inhs LMP1 with Inhs LMP2 with Inhs

**LMP2-no Inhibitors: PTEN signaling (P = 1)**

none LMP1 no Inhs LMP2 no Inhs LMP1 with Inhs LMP2 with Inhs

**LMP1-with Inhibitors: PTEN signaling (P = 0.407)**

| Symbol | Entrez Gene Name                                                                        | LMP1 no Inhs |             | LMP2 no Inhs |             | LMP1 with Inhs |             | LMP2 with Inhs |             |
|--------|-----------------------------------------------------------------------------------------|--------------|-------------|--------------|-------------|----------------|-------------|----------------|-------------|
|        |                                                                                         | p-value      | Fold Change | p-value      | Fold Change | p-value        | Fold Change | p-value        | Fold Change |
| IKBKG  | inhibitor of kappa light polypeptide gene enhancer in B-cells, kinase gamma             | 1.00E+00     | 1.673       | 1.00E+00     | 1.769       | 5.03E-03       | 1.742       | 2.19E-01       | 1.327       |
| ITGA5  | integrin, alpha 5 (fibronectin receptor, alpha polypeptide)                             | 3.64E-01     | -2.172      | 1.00E+00     | -3.726      | 4.33E-02       | -2.098      | 2.27E-02       | -2.119      |
| MAP2K2 | mitogen-activated protein kinase kinase 2                                               | 1.00E+00     | -1.03       | 1.00E+00     | 1.079       | 2.57E-02       | -1.397      | 2.02E-02       | -1.306      |
| RAC2   | ras-related C3 botulinum toxin substrate 2 (rho family, small GTP binding protein Rac2) | 1.00E+00     | 0           | 1.00E+00     | 0           | 1.04E-03       | 1.399       | 7.67E-02       | -1.21       |

**LMP2-with Inhibitors: PTEN signaling (P = 0.008)**

| Symbol  | Entrez Gene Name                                                     | LMP1 no Inhs |             | LMP2 no Inhs |             | LMP1 with Inhs |             | LMP2 with Inhs |             |
|---------|----------------------------------------------------------------------|--------------|-------------|--------------|-------------|----------------|-------------|----------------|-------------|
|         |                                                                      | p-value      | Fold Change | p-value      | Fold Change | p-value        | Fold Change | p-value        | Fold Change |
| BCL2L11 | BCL2-like 11 (apoptosis facilitator)                                 |              |             |              |             | 2.64E-01       | -2.048      | 3.15E-02       | -1.593      |
| INPP5K  | inositol polyphosphate-5-phosphatase K                               |              |             |              |             | 3.88E-01       | 1.251       | 3.46E-02       | -1.27       |
| ITGA5   | integrin, alpha 5 (fibronectin receptor, alpha polypeptide)          | 3.64E-01     | -2.172      | 1.00E+00     | -3.726      | 4.33E-02       | -2.098      | 2.27E-02       | -2.119      |
| MAP2K2  | mitogen-activated protein kinase kinase 2                            | 1.00E+00     | -1.03       | 1.00E+00     | 1.079       | 2.57E-02       | -1.397      | 2.02E-02       | -1.306      |
| NFKB1   | nuclear factor of kappa light polypeptide gene enhancer in B-cells 1 | 7.54E-01     | -1.28       | 8.35E-01     | 1.177       | 9.42E-02       | 1.205       | 1.63E-02       | 1.226       |
| RPS6KB1 | ribosomal protein S6 kinase, 70kDa, polypeptide 1                    | 1.00E+00     | 1.861       | 1.00E+00     | 1.983       | 1.04E-01       | -1.675      | 3.62E-02       | -1.878      |
| SYNJ2   | synaptojanin 2                                                       | 1.00E+00     | 0           | 1.00E+00     | 0           | 2.15E-01       | 1.608       | 4.39E-02       | 1.937       |



**LMP1-no Inhibitors: NFkB signaling (P = 1)**

| Symbol  | Entrez Gene Name                                          |
|---------|-----------------------------------------------------------|
| EIF2AK2 | eukaryotic translation initiation factor 2-alpha kinase 2 |
| UBE2V1  | ubiquitin-conjugating enzyme E2 variant 1                 |

| LMP1 no Inhs |             | LMP2 no Inhs |             | LMP1 with Inhs |             | LMP2 with Inhs |             |
|--------------|-------------|--------------|-------------|----------------|-------------|----------------|-------------|
| p-value      | Fold Change | p-value      | Fold Change | p-value        | Fold Change | p-value        | Fold Change |
| 3.04E-02     | -1.756      |              |             |                |             |                |             |
| 1.10E-03     | 1.739       |              |             |                |             |                |             |

none

**LMP2-no Inhibitors: NFkB signaling (P = 1)**

| LMP1 no Inhs |  | LMP2 no Inhs |  | LMP1 with Inhs |  | LMP2 with Inhs |  |
|--------------|--|--------------|--|----------------|--|----------------|--|
|--------------|--|--------------|--|----------------|--|----------------|--|

**LMP1-with Inhibitors: NFkB signaling (P = 4.27 x 10<sup>-4</sup>)**

| Symbol | Entrez Gene Name                                                            |
|--------|-----------------------------------------------------------------------------|
| HDAC2  | histone deacetylase 2                                                       |
| IKBKG  | inhibitor of kappa light polypeptide gene enhancer in B-cells, kinase gamma |
| IL18   | interleukin 18                                                              |
| TAB3   | TGF-beta activated kinase 1/MAP3K7 binding protein 3                        |
| TBK1   | TANK-binding kinase 1                                                       |
| TLR3   | toll-like receptor 3                                                        |

| LMP1 no Inhs |             | LMP2 no Inhs |             | LMP1 with Inhs |             | LMP2 with Inhs |             |
|--------------|-------------|--------------|-------------|----------------|-------------|----------------|-------------|
| p-value      | Fold Change | p-value      | Fold Change | p-value        | Fold Change | p-value        | Fold Change |
|              |             |              |             | 4.63E-02       | -1.22       |                |             |
|              |             |              |             | 5.03E-03       | 1.742       |                |             |
|              |             |              |             | 5.63E-03       | 1.981       | 1.43E-03       | 1.372       |
|              |             |              |             | 4.07E-02       | -2.665      |                |             |
|              |             |              |             | 4.25E-02       | -1.305      |                |             |
|              |             |              |             | 4.57E-02       | -1.3        | 4.35E-02       | -2.468      |

**LMP2-with Inhibitors: NFkB signaling (P = 1.48 x 10<sup>-4</sup>)**

| Symbol | Entrez Gene Name                                                     |
|--------|----------------------------------------------------------------------|
| ITGA5  | integrin, alpha 5 (fibronectin receptor, alpha polypeptide)          |
| NFKB1  | nuclear factor of kappa light polypeptide gene enhancer in B-cells 1 |
| RIPK1  | receptor (TNFRSF)-interacting serine-threonine kinase 1              |

| LMP1 no Inhs |             | LMP2 no Inhs |             | LMP1 with Inhs |             | LMP2 with Inhs |             |
|--------------|-------------|--------------|-------------|----------------|-------------|----------------|-------------|
| p-value      | Fold Change | p-value      | Fold Change | p-value        | Fold Change | p-value        | Fold Change |
|              |             |              |             | 4.33E-02       | -2.098      | 2.27E-02       | -2.119      |
|              |             |              |             |                |             | 1.63E-02       | 1.226       |
|              |             |              |             |                |             | 3.39E-03       | -1.61       |

**LMP2-with Inhibitors: NFkB signaling (Manual curation)**

| Symbol | Entrez Gene Name        |
|--------|-------------------------|
| NKAP   | NFkB activating protein |

| LMP1 no Inhs |             | LMP2 no Inhs |             | LMP1 with Inhs |             | LMP2 with Inhs |             |
|--------------|-------------|--------------|-------------|----------------|-------------|----------------|-------------|
| p-value      | Fold Change | p-value      | Fold Change | p-value        | Fold Change | p-value        | Fold Change |
|              |             |              |             |                |             | 3.79E-02       | 1.52        |

**LMP1-no Inhibitors: NFkB Activation by Viruses (P = 1)**

**Symbol** **Entrez Gene Name**  
EIF2AK2 eukaryotic translation initiation factor 2-alpha kinase 2

**LMP2-no Inhibitors: NFkB Activation by Viruses (P = 1)**

none

**LMP1-with Inhibitors: NFkB Activation by Viruses (P = 4.95 x 10<sup>-8</sup>)**

**Symbol** **Entrez Gene Name**  
IKBKG inhibitor of kappa light polypeptide gene enhancer in B-cells, kinase gamma  
ITGA5 integrin, alpha 5 (fibronectin receptor, alpha polypeptide)

**LMP2-with Inhibitors: NFkB Activation by Viruses (P = 1.69 x 10<sup>-8</sup>)**

**Symbol** **Entrez Gene Name**  
ITGA5 integrin, alpha 5 (fibronectin receptor, alpha polypeptide)  
NFKB1 nuclear factor of kappa light polypeptide gene enhancer in B-cells 1  
RIPK1 receptor (TNFRSF)-interacting serine-threonine kinase 1

| LMP1 no Inhs |             | LMP2 no Inhs |             | LMP1 with Inhs |             | LMP2 with Inhs |             |
|--------------|-------------|--------------|-------------|----------------|-------------|----------------|-------------|
| p-value      | Fold Change | p-value      | Fold Change | p-value        | Fold Change | p-value        | Fold Change |
| 3.04E-02     | -1.756      |              |             |                |             |                |             |

| LMP1 no Inhs |             | LMP2 no Inhs |             | LMP1 with Inhs |             | LMP2 with Inhs |             |
|--------------|-------------|--------------|-------------|----------------|-------------|----------------|-------------|
| p-value      | Fold Change | p-value      | Fold Change | p-value        | Fold Change | p-value        | Fold Change |
|              |             |              |             | 5.03E-03       | 1.742       |                |             |
|              |             |              |             | 4.33E-02       | -2.098      | 2.27E-02       | -2.119      |

| LMP1 no Inhs |             | LMP2 no Inhs |             | LMP1 with Inhs |             | LMP2 with Inhs |             |
|--------------|-------------|--------------|-------------|----------------|-------------|----------------|-------------|
| p-value      | Fold Change | p-value      | Fold Change | p-value        | Fold Change | p-value        | Fold Change |
|              |             |              |             | 4.33E-02       | -2.098      | 2.27E-02       | -2.119      |
|              |             |              |             |                |             | 1.63E-02       | 1.226       |
|              |             |              |             |                |             | 3.39E-03       | -1.61       |

**LMP1-no Inhibitors: p53 signaling (P = 0.0184)**

| Symbol   | Entrez Gene Name                                          |
|----------|-----------------------------------------------------------|
| PCNA     | proliferating cell nuclear antigen                        |
| SERPINB5 | serpin peptidase inhibitor, clade B (ovalbumin), member 5 |
| SFN      | stratifin                                                 |

| LMP1 no Inhs |             | LMP2 no Inhs |             | LMP1 with Inhs |             | LMP2 with Inhs |             |
|--------------|-------------|--------------|-------------|----------------|-------------|----------------|-------------|
| p-value      | Fold Change | p-value      | Fold Change | p-value        | Fold Change | p-value        | Fold Change |
| 1.39E-02     | -1.567      | 8.60E-01     | -1.042      | 1.07E-01       | -1.523      | 8.93E-02       | -1.434      |
| 1.15E-02     | 1.984       | 9.97E-02     | 1.719       | 5.35E-01       | 1.261       | 5.81E-01       | 1.299       |
| 3.53E-02     | 2.029       | 2.01E-01     | 1.754       | 2.44E-01       | -1.2        | 6.46E-01       | -1.123      |

**LMP2-no Inhibitors: p53 signaling (P = 0.1956)**

| Symbol | Entrez Gene Name       |
|--------|------------------------|
| PML    | promyelocytic leukemia |

| LMP1 no Inhs |             | LMP2 no Inhs |             | LMP1 with Inhs |             | LMP2 with Inhs |             |
|--------------|-------------|--------------|-------------|----------------|-------------|----------------|-------------|
| p-value      | Fold Change | p-value      | Fold Change | p-value        | Fold Change | p-value        | Fold Change |
| 4.01E-01     | -1.174      | 2.33E-02     | -2.367      | 7.11E-01       | 1.114       | 4.66E-02       | -1.449      |

**LMP1-with Inhibitors: p53 signaling (P = 0.4955)**

| Symbol | Entrez Gene Name                      |
|--------|---------------------------------------|
| CSNK1D | casein kinase 1, delta                |
| PERP   | PERP, TP53 apoptosis effector         |
| TP53I3 | tumor protein p53 inducible protein 3 |

| LMP1 no Inhs |             | LMP2 no Inhs |             | LMP1 with Inhs |             | LMP2 with Inhs |             |
|--------------|-------------|--------------|-------------|----------------|-------------|----------------|-------------|
| p-value      | Fold Change | p-value      | Fold Change | p-value        | Fold Change | p-value        | Fold Change |
| 1.00E+00     | 0           | 1.00E+00     | 0           | 2.53E-02       | -1.754      | 4.94E-02       | -1.485      |
|              |             |              |             | 4.94E-02       | -7.403      | 1.00E+00       |             |
| 2.06E-01     | 1.219       | 1.08E-01     | -1.341      | 9.11E-04       | 3.243       | 9.31E-01       | -1.022      |

**LMP2-with Inhibitors: p53 signaling (P = 0.2889)**

| Symbol | Entrez Gene Name                |
|--------|---------------------------------|
| CSNK1D | casein kinase 1, delta          |
| FAS    | Fas cell surface death receptor |
| PML    | promyelocytic leukemia          |

| LMP1 no Inhs |             | LMP2 no Inhs |             | LMP1 with Inhs |             | LMP2 with Inhs |             |
|--------------|-------------|--------------|-------------|----------------|-------------|----------------|-------------|
| p-value      | Fold Change | p-value      | Fold Change | p-value        | Fold Change | p-value        | Fold Change |
| 1.00E+00     | 0           | 1.00E+00     | 0           | 2.53E-02       | -1.754      | 4.94E-02       | -1.485      |
| 1.00E+00     | -1.102      | 1.00E+00     | 0           | 1.24E-01       | -1.23       | 3.08E-03       | -1.72       |
| 4.01E-01     | -1.174      | 2.33E-02     | -2.367      | 7.11E-01       | 1.114       | 4.66E-02       | -1.449      |

**LMP1-noInhs\_CDC42 signaling (P = 0.6239)**

| Symbol | Entrez Gene Name                                    |
|--------|-----------------------------------------------------|
| ARPC4  | actin related protein 2/3 complex, subunit 4, 20kDa |

| LMP1 no Inhs |             | LMP2 no Inhs |             | LMP1 with Inhs |             | LMP2 with Inhs |             |
|--------------|-------------|--------------|-------------|----------------|-------------|----------------|-------------|
| p-value      | Fold Change | p-value      | Fold Change | p-value        | Fold Change | p-value        | Fold Change |
| 1.11E-02     | -1.511      | 9.32E-01     | -1.01       | 5.30E-01       | -1.042      | 2.83E-01       | 1.177       |

**LMP2-noInhs\_CDC42 signaling (P = 0.3135)**

| Symbol | Entrez Gene Name          |
|--------|---------------------------|
| BAIAP2 | BAI1-associated protein 2 |

| LMP1 no Inhs |             | LMP2 no Inhs |             | LMP1 with Inhs |             | LMP2 with Inhs |             |
|--------------|-------------|--------------|-------------|----------------|-------------|----------------|-------------|
| p-value      | Fold Change | p-value      | Fold Change | p-value        | Fold Change | p-value        | Fold Change |
| 9.89E-01     | -1.006      | 3.81E-02     | -1.488      | 1.71E-01       | 1.399       | 7.03E-01       | -1.09       |

**LMP1 with Inhs\_CDC42 signaling (P = 0.0167)**

| Symbol | Entrez Gene Name                                            |
|--------|-------------------------------------------------------------|
| ARPC1A | actin related protein 2/3 complex, subunit 1A, 41kDa        |
| CLIP1  | CAP-GLY domain containing linker protein 1                  |
| EXOC3  | exocyst complex component 3                                 |
| FGD1   | FYVE, RhoGEF and PH domain containing 1                     |
| HLA-B  | major histocompatibility complex, class I, B                |
| IQGAP3 | IQ motif containing GTPase activating protein 3             |
| ITGA5  | integrin, alpha 5 (fibronectin receptor, alpha polypeptide) |
| MYL6   | myosin, light chain 6, alkali, smooth muscle and non-muscle |
| MYL9   | myosin, light chain 9, regulatory                           |
| PAK1   | p21 protein (Cdc42/Rac)-activated kinase 1                  |

| LMP1 no Inhs |             | LMP2 no Inhs |             | LMP1 with Inhs |             | LMP2 with Inhs |             |
|--------------|-------------|--------------|-------------|----------------|-------------|----------------|-------------|
| p-value      | Fold Change | p-value      | Fold Change | p-value        | Fold Change | p-value        | Fold Change |
| 3.33E-01     | 1.922       | 7.89E-01     | 1.212       | 3.81E-02       | 1.382       | 2.37E-01       | -1.175      |
| 7.27E-01     | 1.138       | 8.90E-02     | -2.449      | 4.59E-03       | 1.901       | 5.89E-01       | 1.072       |
| 1.00E+00     | 0           | 1.00E+00     | 0           | 1.28E-02       | 1.561       | 3.09E-02       | -1.456      |
| 1.00E+00     | 0           | 1.00E+00     | 0           | 1.73E-02       | 1.362       | 1.00E+00       | -1.038      |
| 1.00E+00     | -2.445      | 1.00E+00     | -1.504      | 2.06E-02       | 4.993       | 1.00E+00       | 1.329       |
| 1.00E+00     | 0           | 1.00E+00     | 0           | 8.66E-03       | 2.33        | 3.17E-01       | -1.12       |
| 3.64E-01     | -2.172      | 1.00E+00     | -3.726      | 4.33E-02       | -2.098      | 2.27E-02       | -2.119      |
| 5.11E-02     | 1.436       | 4.10E-01     | 1.254       | 1.40E-02       | 1.973       | 9.73E-03       | 1.755       |
| 1.00E+00     | 0           | 1.00E+00     | 0           | 4.54E-02       | 3.181       | 1.00E+00       | -1.094      |
|              |             |              |             | 3.34E-02       | -1.594      | 1.00E+00       |             |

**LMP2 with Inhs\_CDC42 signaling (P = 0.2233)**

| Symbol | Entrez Gene Name                                            |
|--------|-------------------------------------------------------------|
| ACTR2  | ARP2 actin-related protein 2 homolog (yeast)                |
| EXOC3  | exocyst complex component 3                                 |
| EXOC5  | exocyst complex component 5                                 |
| ITGA5  | integrin, alpha 5 (fibronectin receptor, alpha polypeptide) |
| MYL6   | myosin, light chain 6, alkali, smooth muscle and non-muscle |

| LMP1 no Inhs |             | LMP2 no Inhs |             | LMP1 with Inhs |             | LMP2 with Inhs |             |
|--------------|-------------|--------------|-------------|----------------|-------------|----------------|-------------|
| p-value      | Fold Change | p-value      | Fold Change | p-value        | Fold Change | p-value        | Fold Change |
| 3.55E-01     | 1.594       | 9.05E-01     | -1.028      | 8.73E-01       | -1.01       | 4.13E-02       | -1.124      |
| 1.00E+00     | 0           | 1.00E+00     | 0           | 1.28E-02       | 1.561       | 3.09E-02       | -1.456      |
| 1.00E+00     | 0           | 1.00E+00     | 0           | 1.52E-01       | -1.403      | 1.07E-02       | -2.131      |
| 3.64E-01     | -2.172      | 1.00E+00     | -3.726      | 4.33E-02       | -2.098      | 2.27E-02       | -2.119      |
| 5.11E-02     | 1.436       | 4.10E-01     | 1.254       | 1.40E-02       | 1.973       | 9.73E-03       | 1.755       |
